# Supplementary material
Source: PubMed Central journal article supplement (PMC7512009)
Supplement: NIHMS1627063-supplement-Supplemental_figures_tables.pdf [file NIHMS1627063-supplement-Supplemental_figures_tables.pdf]

## **Supplementary Information:**

### **Whole-genome and exome sequencing of bladder cancer identifies frequent alterations in genes involved in sister chromatid cohesion and segregation**

Guangwu Guo<sup>\*</sup>, Xiaojuan Sun<sup>\*</sup>, Chao Chen<sup>\*</sup>, Song Wu<sup>\*</sup>, Peide Huang<sup>\*</sup>, Zesong Li<sup>\*</sup>, Michael Dean<sup>\*</sup>, Yi Huang, Wenlong Jia, Quan Zhou, Aifa Tang, Zuoquan Yang, Xianxin Li, Pengfei Song, Xiaokun Zhao, Rui Ye, Shiqiang Zhang, Zhao Lin, Mingfu Qi, Shengqing Wan, Liangfu Xie, Fan Fan, Michael L Nickerson, Xiangjun Zou, Xueda Hu, Li Xing, Zhaojie Lv, Hongbin Mei, Shengjie Gao, Chaozhao Liang, Zhibo Gao, Jingxiao Lu, Yuan Yu, Chunxiao Liu, Lin Li, Xiaodong Fang, Zhimao Jiang, Jie Yang, Cailing Li, Xin Zhao, Jing Chen, Fang Zhang, Yongqi Lai, Zheguang Lin, Fangjian Zhou, Hao Chen, Hsiao Chang Chan, Shirley Tsang, Dan Theodorescu, Yingrui Li, Xiuqing Zhang, Jian Wang, Huanming Yang, Yaoting Gui, Jun Wang, & Zhiming Cai

\* These authors contributed equally to this work.

Correspondence should be addressed to Z.C. ([caizhiming2000@163.com](mailto:caizhiming2000@163.com)), Jun Wang ([wangj@genomics.org.cn](mailto:wangj@genomics.org.cn)), or Y.G. ([guiyaoting@hotmail.com](mailto:guiyaoting@hotmail.com)).

## Supplementary Note

### Novel significantly mutated genes in TCC

In our study we detected 13 novel significantly mutated genes that have not been reported in TCC (**Fig. 1**). These genes included *STAG2*, *ERCC2*, *SYNE2*, *ELF3*, *ESPL1*, *CSMD3*, *TRAK1*, *PDZD2*, *TRRAP*, *PIK3R4*, *KALRN*, *ATM* and *FAT4*.

To our knowledge, mutations in the well-known cancer gene *ATM* were not reported in bladder cancer previously, and it harbored mutations in 5% of the tumors in this study. Additionally, several of these mutated genes detected in present study are not well-established cancer genes, but corroborating evidences from recent studies points to their potential roles in cancer. *STAG2* and *ESPL1*, two genes involved in sister chromatid cohesion and segregation, were fully discussed in main text. *ERCC2*, encoding a component of the core-TFIIH basal transcription factor, is a major player in the nucleotide excision repair pathway and is also involved in transcription initiation and in the control of the cell cycle and apoptosis<sup>1</sup>. Defects in this gene can result in cancer-prone syndrome xeroderma pigmentosum complementation group D<sup>2</sup> and polymorphisms in *ERCC2* were reported to be associated with risk of head and neck cancer<sup>3</sup>. In our study, we detected somatic mutations in *ERCC2* in seven (7%) TCCs and as expected, the mutation rates in *ERCC2*-mutated tumors were significantly higher than *ERCC2*-wild-type tumors (**Supplementary Figure 8**;  $P=0.003$ ). *FAT4*, belonging to the E-cadherin family, demonstrated tumor-suppressor activity in gastric adenocarcinoma<sup>4</sup> and were found mutated in 5% of tumors in our cohort. *TRRAP* (mutated in 5% of the tumors) functions as part of a multiprotein coactivator complex possessing histone acetyltransferase activity and was identified as candidate oncogene in melanoma<sup>5</sup>.

In addition to well-known and candidate cancer genes, our study also revealed several genes with poorly characterized functional roles in cancer but sufficient mutational evidence to warrant experiment investigation. The protein encoded by *SYNE2* is structural nuclear envelope protein that tethers nuclei to the cytoskeleton and aids in the maintenance of the structural integrity of the nucleus<sup>6</sup>. Somatic mutations in *SYNE2* were

reported in genomic analyses of ovarian carcinoma<sup>7</sup>. Mutations in *SYNE1*, a paralog of *SYNE2* and also a nuclear envelope protein, were detected in our previous bladder cancer genome study<sup>8</sup>. Here, *SYNE1* and *SYNE2* were altered by 15 somatic no-silent mutations and both qualified as a significantly mutated gene (**Fig. 1**). Alterations included 7 nonsynonymous and 1 bp insertion in *SYNE1*, and 6 missense changes and a C>T causing a Q3171\* in *SYNE2*. *EFL3* is transcriptional activator that binds and transactivates ETS sequences, and may play a critical regulator of epithelial cell differentiation<sup>9</sup>. Six mutations, including three frame-shift indels and one splice site change, were detected in *EFL3*, suggesting that *EFL3* might function as a tumor suppressor. *CSMD3*, a significantly mutated gene in ovarian carcinoma<sup>7</sup>, was frequently mutated with six mutations (6%). *PIK3R4*, a subunit of the PI3K complex, was altered in five tumors (5%).

### **Frequent amplification of *DHFR* in TCC**

In our study, we detected a frequently amplified region containing *DHFR* gene in 5q (a frequent loss in our dataset) in 14 (14%) tumors (**Supplementary Figure 16**). Further fluorescence in situ hybridization (FISH) and Real time quantitative PCR experiments confirmed the *DHFR* amplification in our cohort (**Supplementary Figure 17**). In addition, a moderately strong correlation coefficient ( $R^2=0.60$ ,  $P = 0.018$ ) was observed between changes in copy number and in gene expression level for *DHFR*. Five tumors with *DHFR* amplification had matched normal RNA-Seq data and we found expression levels of *DHFR* were up-regulated in all of them. *DHFR*, encoding dihydrofolate reductase, has a critical role in regulating the amount of tetrahydrofolate, which is essential for *de novo* purine and thymidylate synthesis<sup>10</sup>. Hence *DHFR* has a critical role in cell growth and proliferation, and *DHFR* is the target of many anticancer agents including methotrexate<sup>11</sup> and pemetrexed<sup>12</sup>. Methotrexate is also a component of the neoadjuvant MVAC (methotrexate, vinblastine, Adriamycin, and cisplatin) chemotherapy before radical cystectomy, which was used for treatment of muscle-invasive bladder cancer with pathologic stage T3, T4, or node-positive tumors to eradicate micrometastases, downstage tumor, reduce implantation of circulating tumor cells during surgery, and ultimately improve survival<sup>13</sup>. Previous studies showed *DHFR* amplification

is a frequent mechanism of methotrexate resistance<sup>14</sup>. Certainly, frequent amplification of *DHFR* in TCC suggests its utility as a biomarker for contraindicating the use of methotrexate for TCC.

### Supplementary References

1. Benhamou, S. & Sarasin, A. ERCC2/XPD gene polymorphisms and cancer risk. *Mutagenesis* **17**, 463-9 (2002).
2. Takayama, K. *et al.* Defects in the DNA repair and transcription gene ERCC2 in the cancer-prone disorder xeroderma pigmentosum group D. *Cancer Res* **55**, 5656-63 (1995).
3. Sturgis, E.M. *et al.* XPD/ERCC2 polymorphisms and risk of head and neck cancer: a case-control analysis. *Carcinogenesis* **21**, 2219-23 (2000).
4. Zang, Z.J. *et al.* Exome sequencing of gastric adenocarcinoma identifies recurrent somatic mutations in cell adhesion and chromatin remodeling genes. *Nat Genet* (2012).
5. Wei, X. *et al.* Exome sequencing identifies GRIN2A as frequently mutated in melanoma. *Nat Genet* **43**, 442-6 (2011).
6. Neumann, S. *et al.* Nesprin-2 interacts with {alpha}-catenin and regulates Wnt signaling at the nuclear envelope. *J Biol Chem* **285**, 34932-8 (2010).
7. The Cancer Genome Atlas Research Network. Integrated genomic analyses of ovarian carcinoma. *Nature* **474**, 609-15 (2011).
8. Gui, Y. *et al.* Frequent mutations of chromatin remodeling genes in transitional cell carcinoma of the bladder. *Nat Genet* **43**, 875-8 (2011).
9. Oettgen, P. *et al.* Isolation and characterization of a novel epithelium-specific transcription factor, ESE-1, a member of the ets family. *Mol Cell Biol* **17**, 4419-33 (1997).
10. Schnell, J.R., Dyson, H.J. & Wright, P.E. Structure, dynamics, and catalytic function of dihydrofolate reductase. *Annu Rev Biophys Biomol Struct* **33**, 119-40 (2004).
11. Schweitzer, B.I., Dicker, A.P. & Bertino, J.R. Dihydrofolate reductase as a therapeutic target. *FASEB J* **4**, 2441-52 (1990).
12. Cohen, M.H., Justice, R. & Pazdur, R. Approval summary: pemetrexed in the initial treatment of advanced/metastatic non-small cell lung cancer. *Oncologist* **14**, 930-5 (2009).
13. Jacobs, B.L., Lee, C.T. & Montie, J.E. Bladder cancer in 2010: how far have we come? *CA Cancer J Clin* **60**, 244-72 (2010).
14. Bertino, J.R., Goker, E., Gorlick, R., Li, W.W. & Banerjee, D. Resistance Mechanisms to Methotrexate in Tumors. *Oncologist* **1**, 223-226 (1996).

## Supplementary Figures

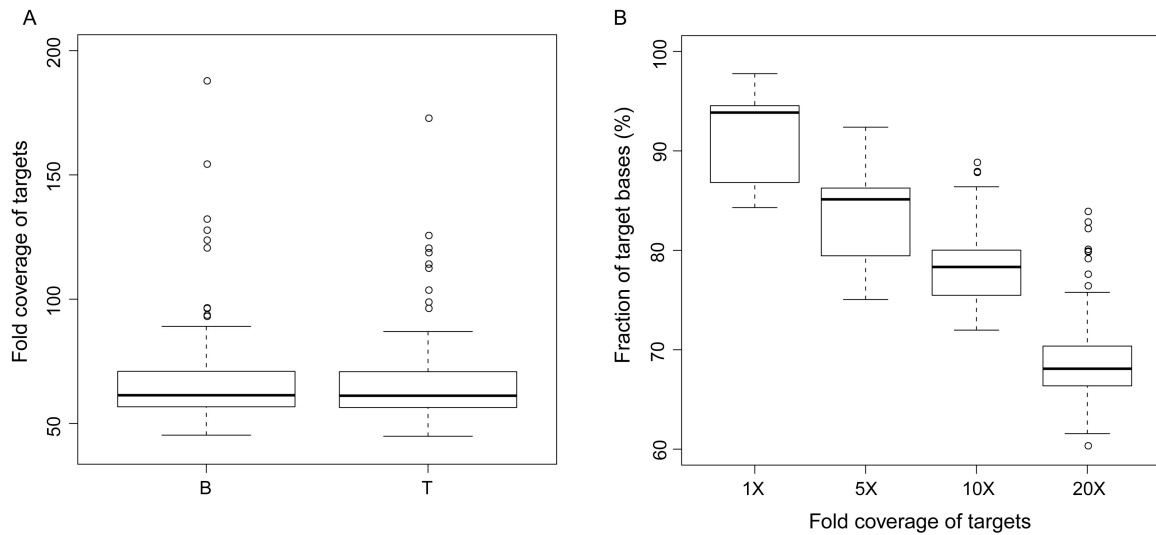

**Supplementary Figure 1. Fold coverage of targeted regions for the peripheral blood (B) and tumor (T) samples from 99 TCC patients analyzed by WES. (a)** The box plot depicts the distribution of mean coverage of all tumor and blood samples sequenced. Lines in the two central boxes show the medians, and lines outside the two central boxes show the first and the third quartiles of the mean depths. **(b)** The box plot depicts the distribution of fraction of targeted bases covered by at least 1 $\times$ , 5 $\times$ , 10 $\times$  and 20 $\times$  across the 99 pairs of samples. Lines in the inner four boxes show the medians, and lines outside the four boxes show the first and the third quartiles.

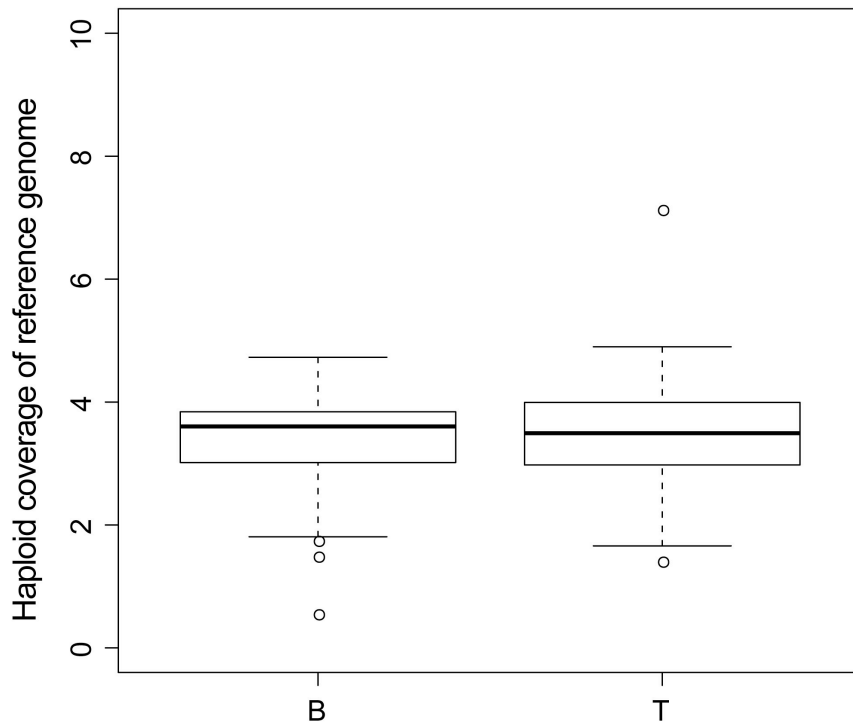

**Supplementary Figure 2. Haploid coverage of reference genome sequence for the peripheral blood (B) and tumor (T) samples from 99 TCC patients analyzed by whole genome sequencing.**

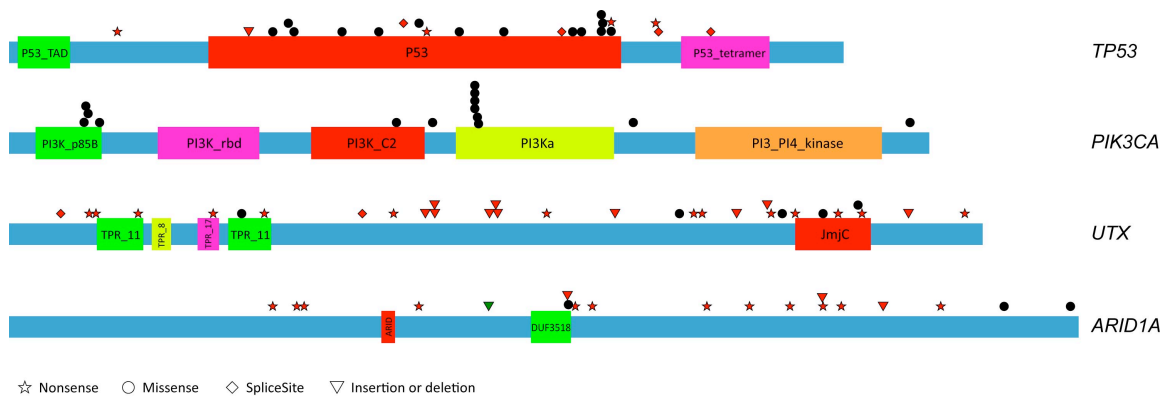

**Supplementary Figure 3. Somatic mutations in *TP53*, *PIK3CA*, *KDM6A/UTX* and *ARID1A*.** The types and relative positions of confirmed somatic mutations are shown in the transcripts using the following symbols: red stars, nonsense mutations; bullets, missense mutations; red triangles, frame-shift indels; green triangles, in-frame indels; and diamond, mutations at splice sites. Domains and motifs in each encoded protein product are also indicated: P53\_TAD, p53 transactivation domain; P53, p53 DNA-binding; P53\_tetramer, p53 tetramerisation; PI3K\_p85B, phosphatidylinositol 3-kinase adaptor-binding (PI3K ABD) domain; PI3K\_rbd, phosphatidylinositol 3-kinase Ras-binding (PI3K RBD) domain; PI3K\_C2, phosphatidylinositol 3-kinase C2 (PI3K C2) domain; PI3Ka, phosphoinositide 3-kinase, accessory (PIK) domain; PI3\_PI4\_kinase, phosphatidylinositol 3-/4-kinase, catalytic domain; TPR, tetratricopeptide repeat; JmjC, JmjC domain; ARID, ARID/BRIGHT DNA-binding domain; DUF3518, domain of unknown function DUF3518.

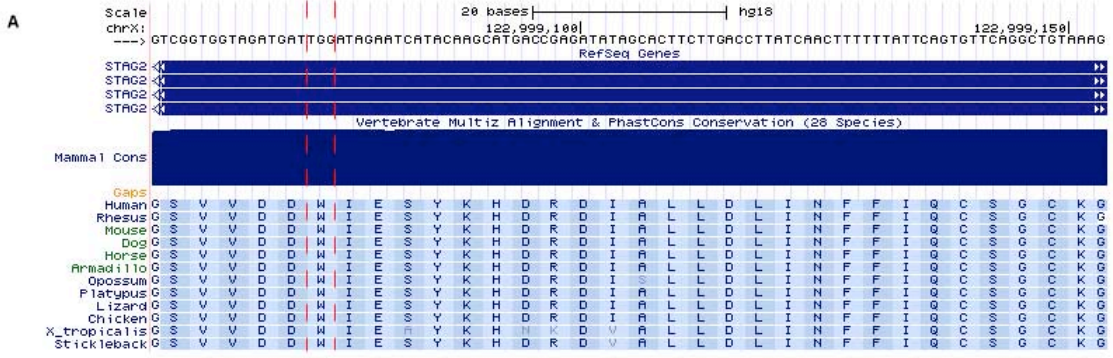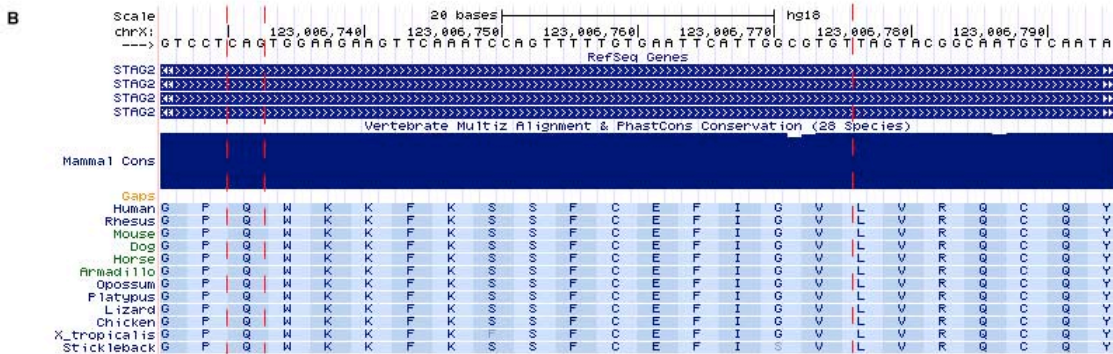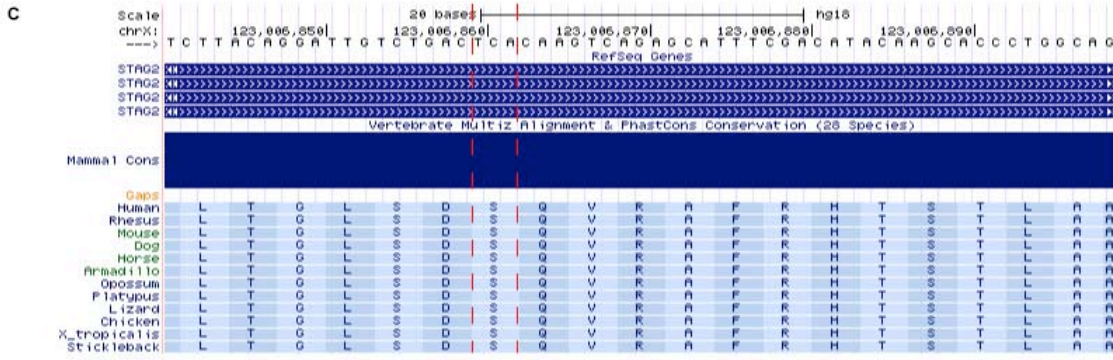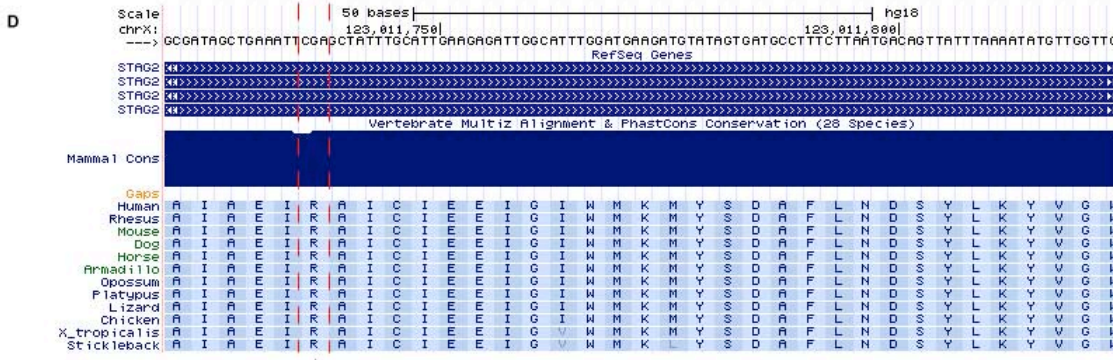



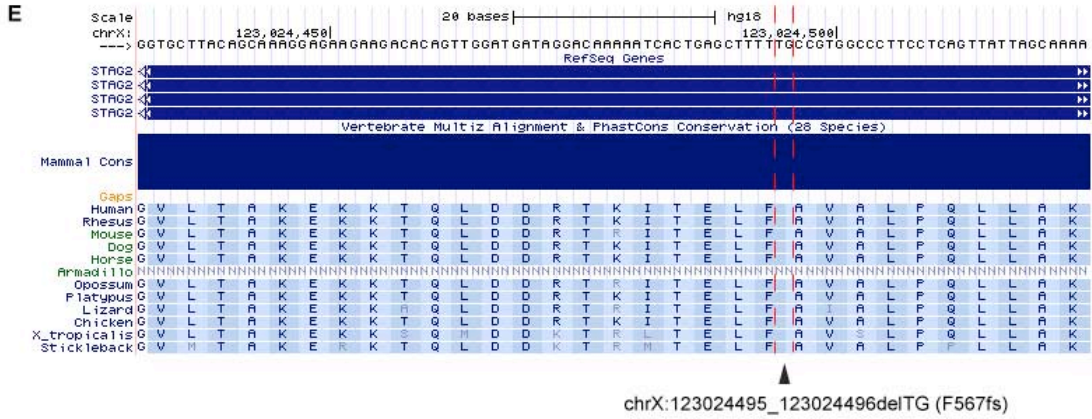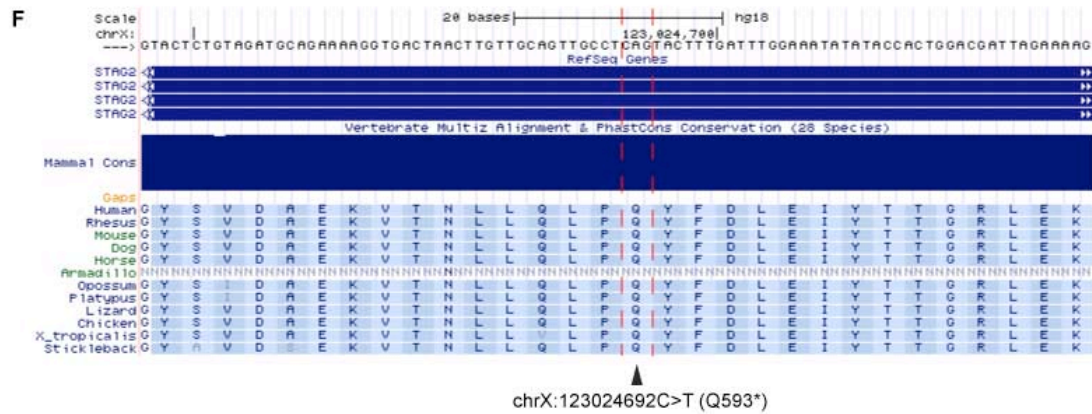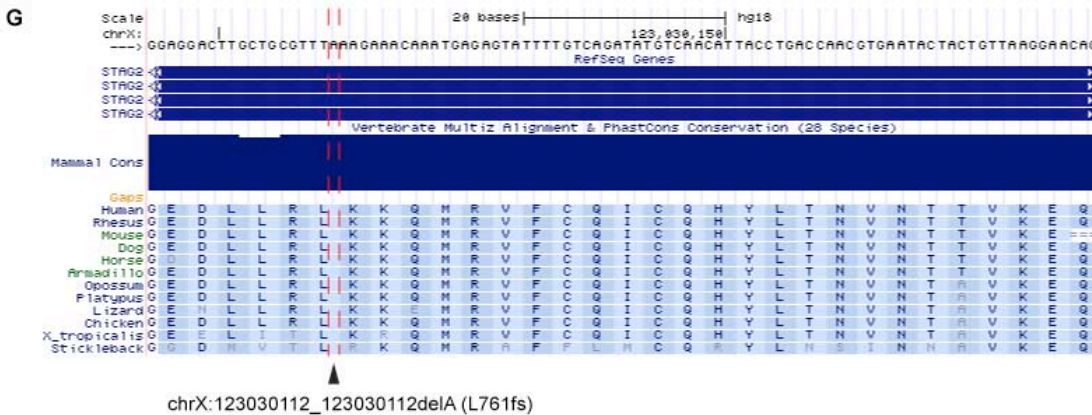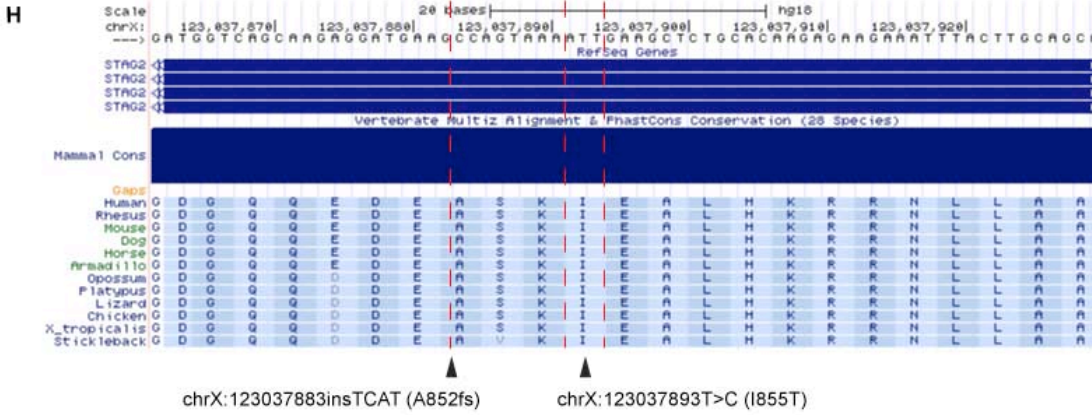

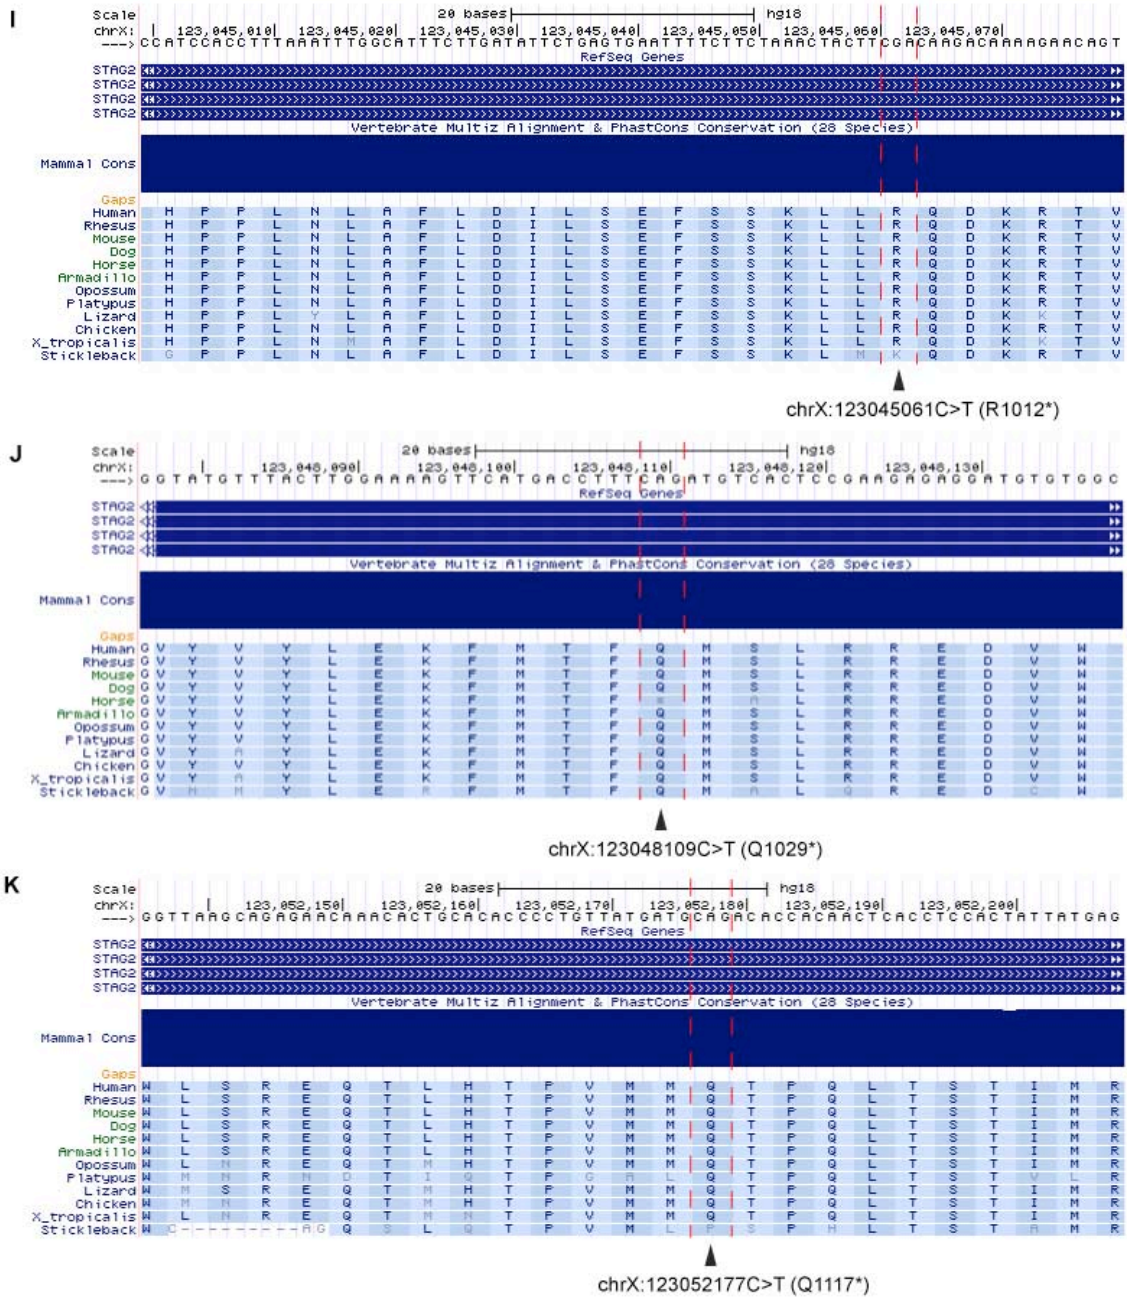

**Supplementary Figure 4. Alignment of STAG2 amino acid sequences from different species. Mutations in *STAG2* detected in 99 tumors and consequence amino acids changes are shown.**

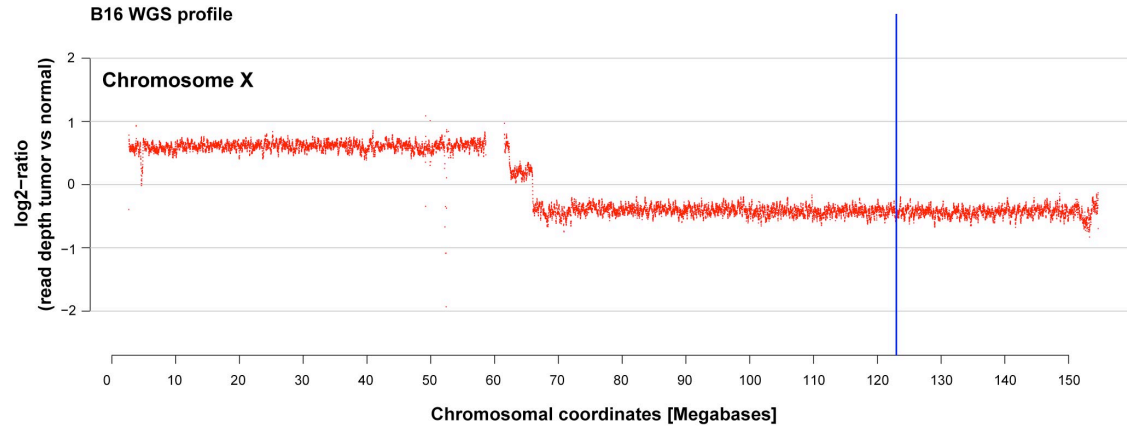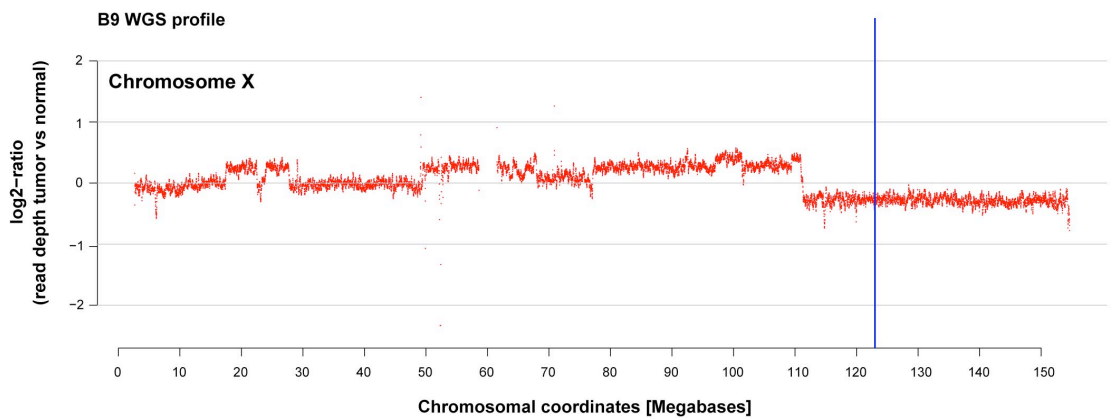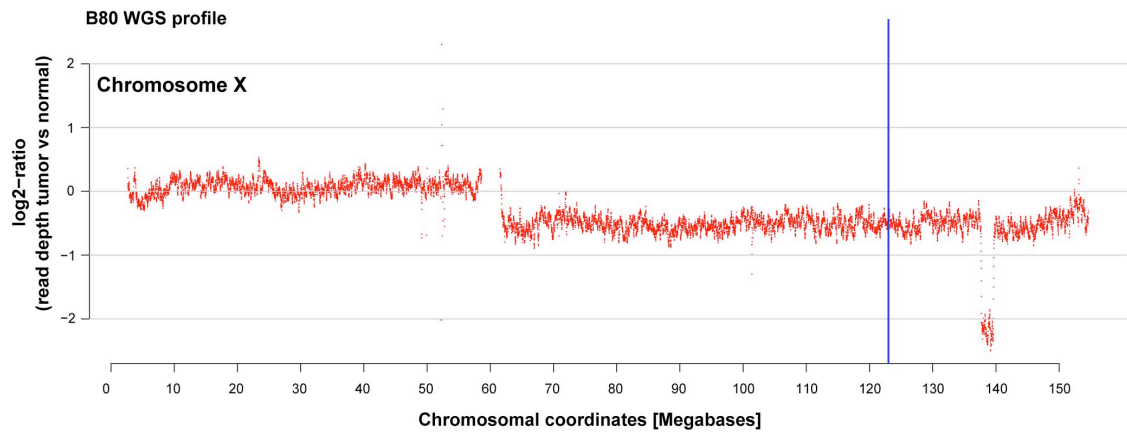

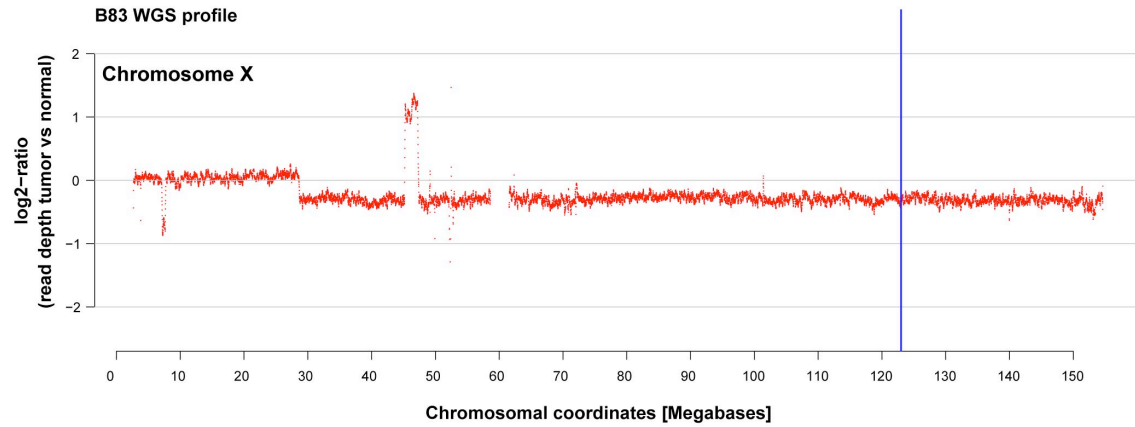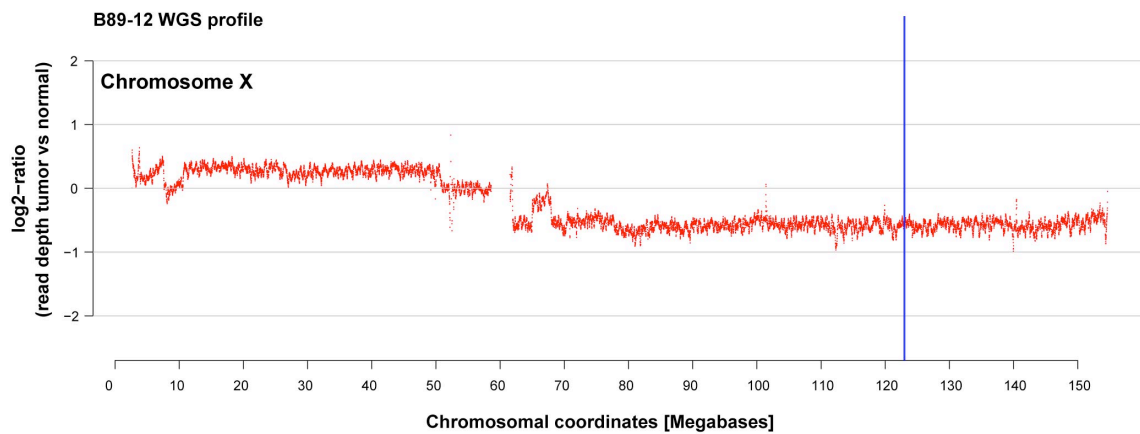

**Supplementary Figure 5. Genomic deletions of *STAG2* in five of the 99 tumors.** Chromosome X copy number plots as estimated by read depth of tumors vs. blood samples. The blue lines indicated the location of *STAG2* on chromosome X.

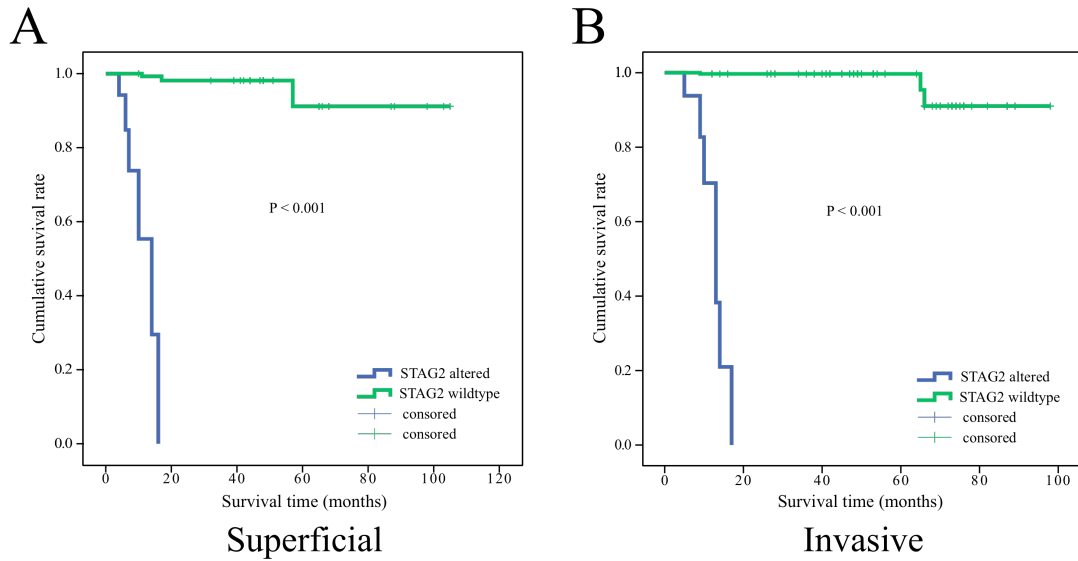

**Supplementary Figure 6. Kaplan-Meier survival analysis of TCC patients with superficial (a) and invasive disease (b).** In both subtypes of TCC, the survival rate for individuals with *STAG2* alterations is significantly lower (log-rank test,  $P < 0.001$ ) than that for patients with wild-type *STAG2* tumors.

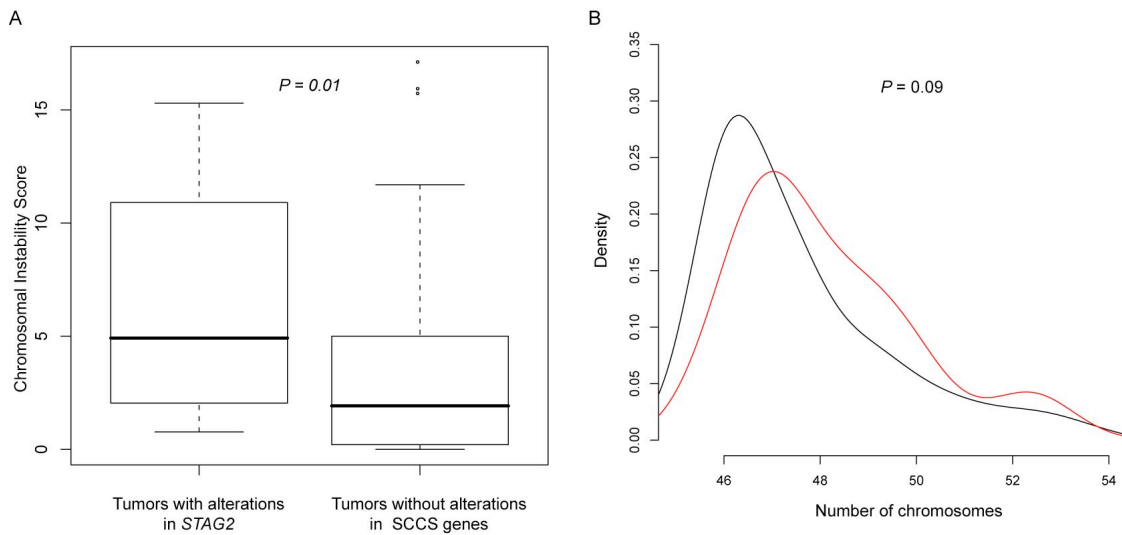

**Supplementary Figure 7. *STAG2* alterations were significantly associated with aneuploidy in TCC. (a)** The aneuploidy in tumor was estimated by chromosome instability (CIN) score. The CINs were evaluated basing on the copy number of chromosome arms and were calculated with formula  $CIN = 100 \left( \sum_{i=1}^n |C_i - 2| L_i / 2 \sum_{i=1}^n L_i \right)$  where  $C$  is the copy number value of chromosome arms,  $L$  is the length of the chromosome arms and  $n$  is the number of chromosome arms. Tumors with alterations in *STAG2* show significantly more aneuploidy than tumors with wild-type *SCCS* genes. **(b)** Kernel density estimation of chromosome counts in tumors with *STAG2* alterations (red line) and in tumors with wild-type *SCCS* genes (black line). The  $P$  values in **(a)** and **(b)** were determined by Wilcoxon test.

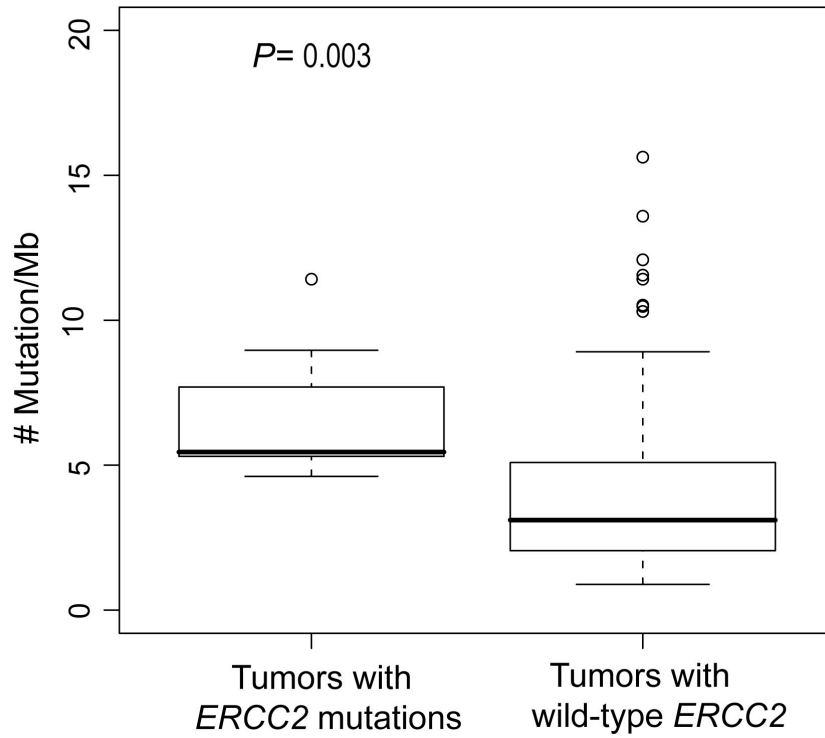

**Supplementary Figure 8.** The mutation rates in *ERCC2*-mutated tumors are significantly higher than *ERCC2*-wild-type tumors. *ERCC2* is a gene involved in transcription-coupled nucleotide excision repair.

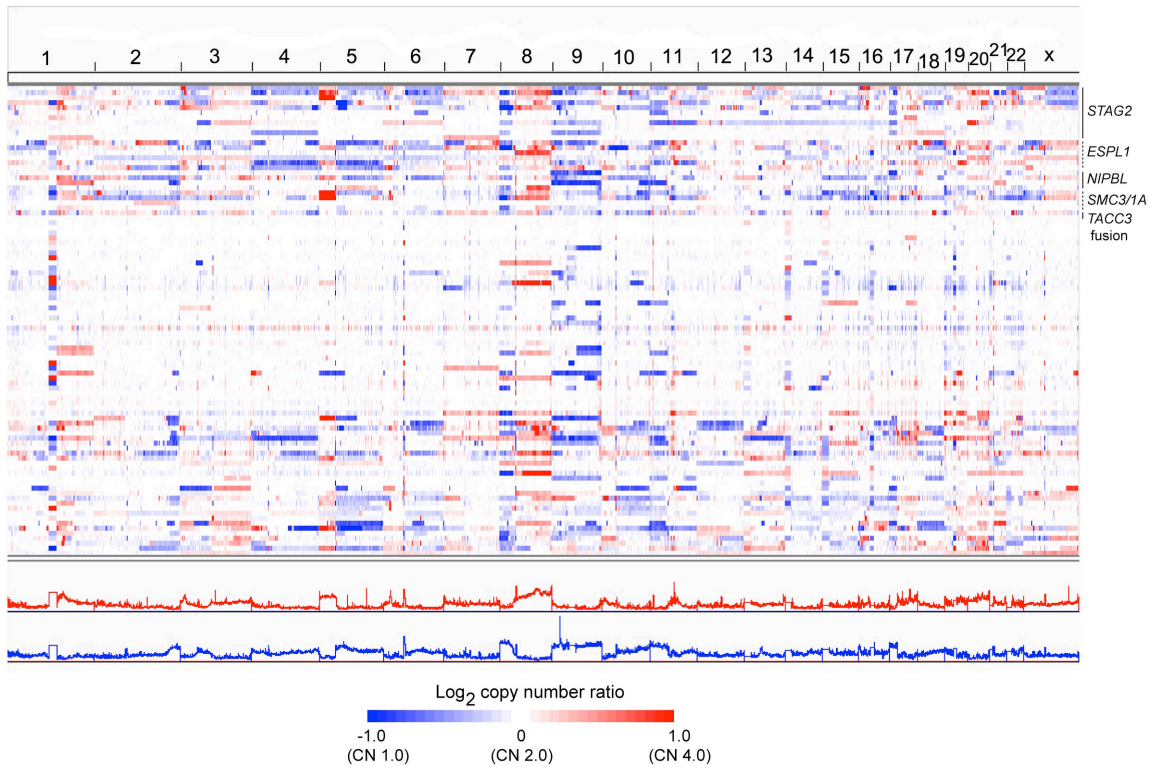

**Supplementary Figure 9. Copy number alteration profiles of 99 bladder tumors rendered by Integrative Genomics Viewer (IGV).** The tracks in the upper panel are tumor samples and the lower panels represent the amplification (red line) and deletion (blue line) G-score profiles across the tumor genomes. The lines and dotted lines in the right panel indicate the tumor samples with alteration in genes involved in sister chromatid cohesion and segregation.



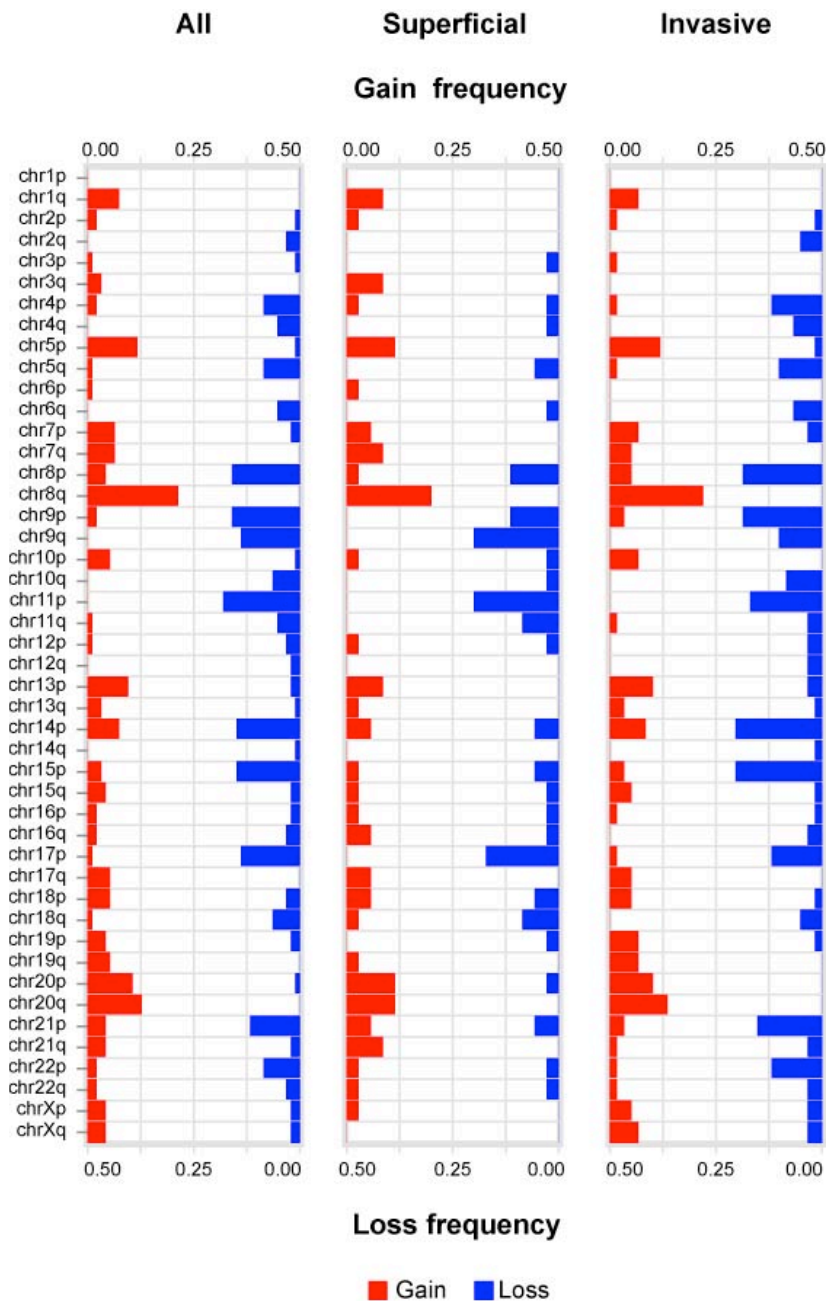

**Supplementary Figure 10. Frequency of broad cytogenetic events across 99 TCCs and in the different subgroups of TCC.** Each chromosomal arm region in each tumor sample is classified as copy gain ( $\geq 2.5$ ) or loss ( $\leq 1.5$ ) if  $>60\%$  of the region consists of CNA segments.

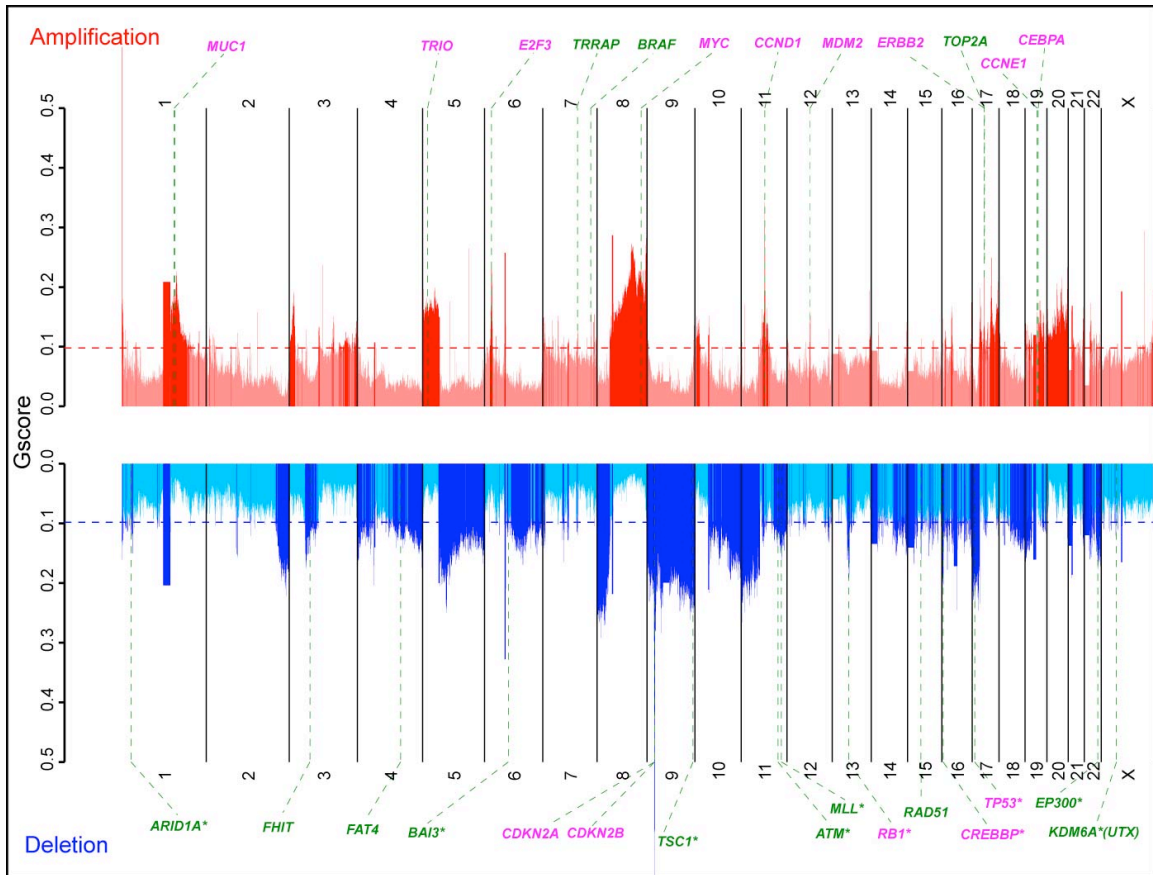

**Supplementary Figure 11. Chromosomal overviews of amplification and deletion peaks with locations of putative cancer driver genes.** The genes in pink indicate focal copy number alterations and \* shows the genes with truncating mutations. The horizontal dotted red and blue lines indicate the G-Score value of 0.098, corresponding to  $P < 0.001$  level of significance.

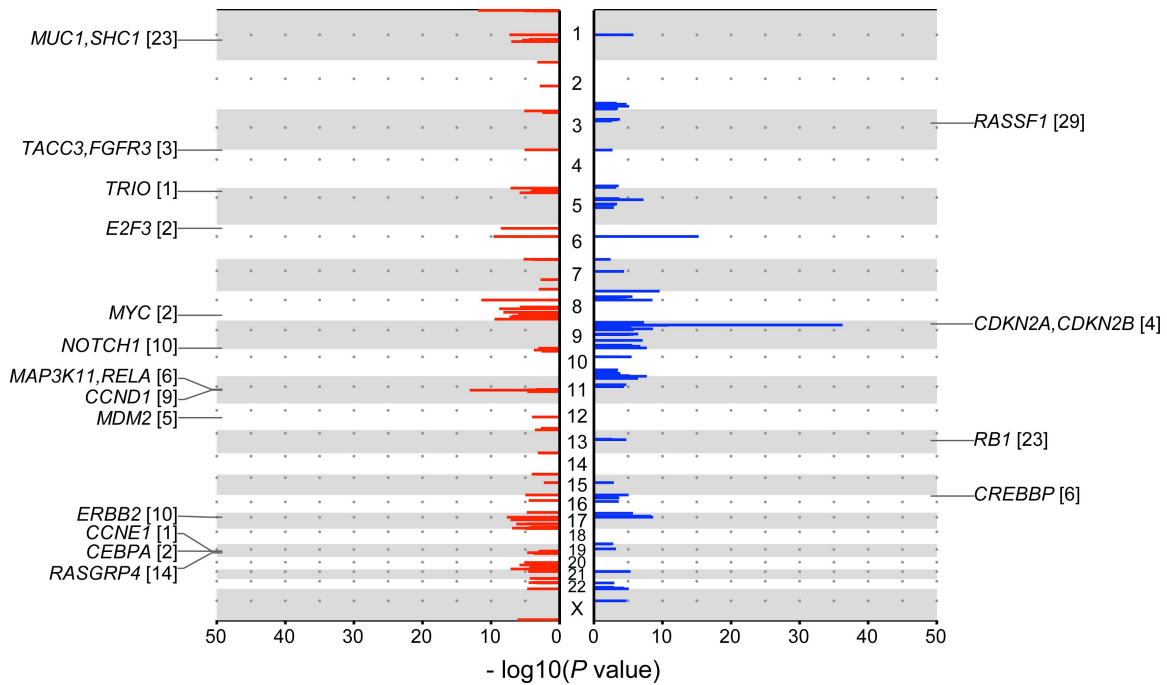

**Supplementary Figure 12. GISTIC significant, recurrent focal amplifications (red) and deletions (blue) are plotted along the genome. Chromosomes are indicated in a vertical column between amplified (left) or deleted (right) regions. Genes of interest are indicated and the number of genes mapping to each region of amplifications or deletions are included in brackets.**

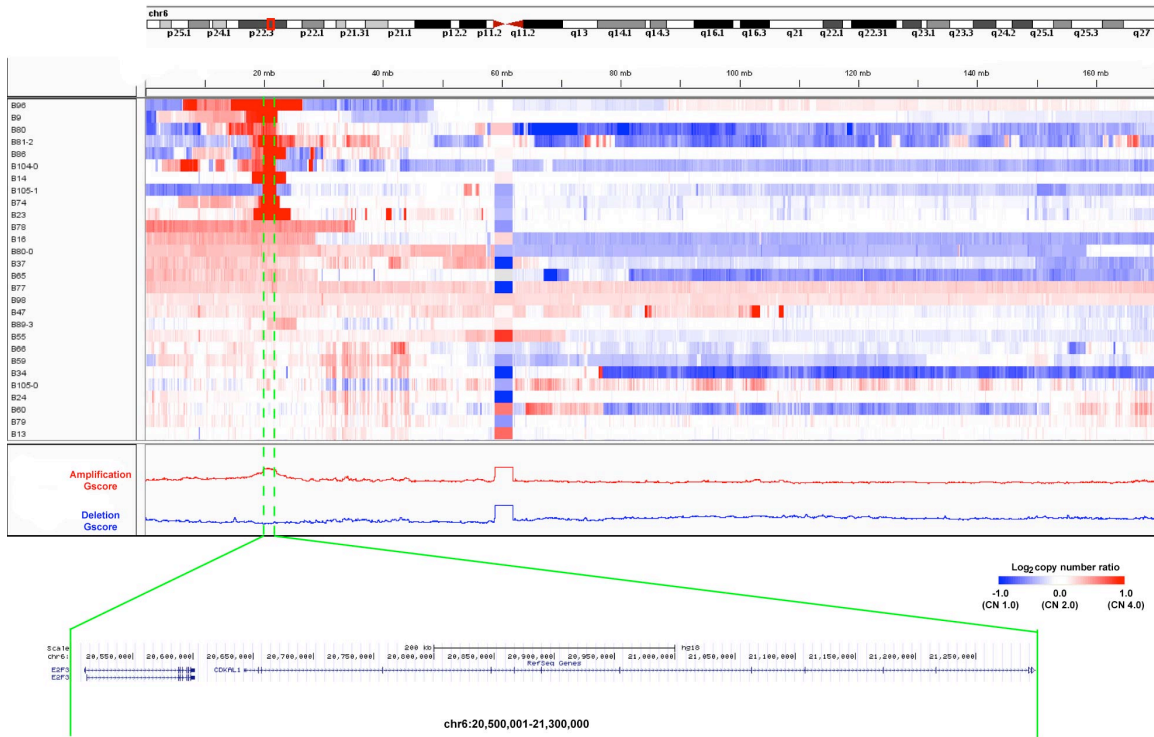

**Supplementary Figure 13. A significant region of focal amplification in chromosome 6 encompassing *E2F3* in TCCs. G-Score values from GISTIC analysis are shown below the copy number profiles. Output is rendered by the Integrative Genomics Viewer (IGV). RefSeq genes mapping to the amplification region are shown below the IGV output.**

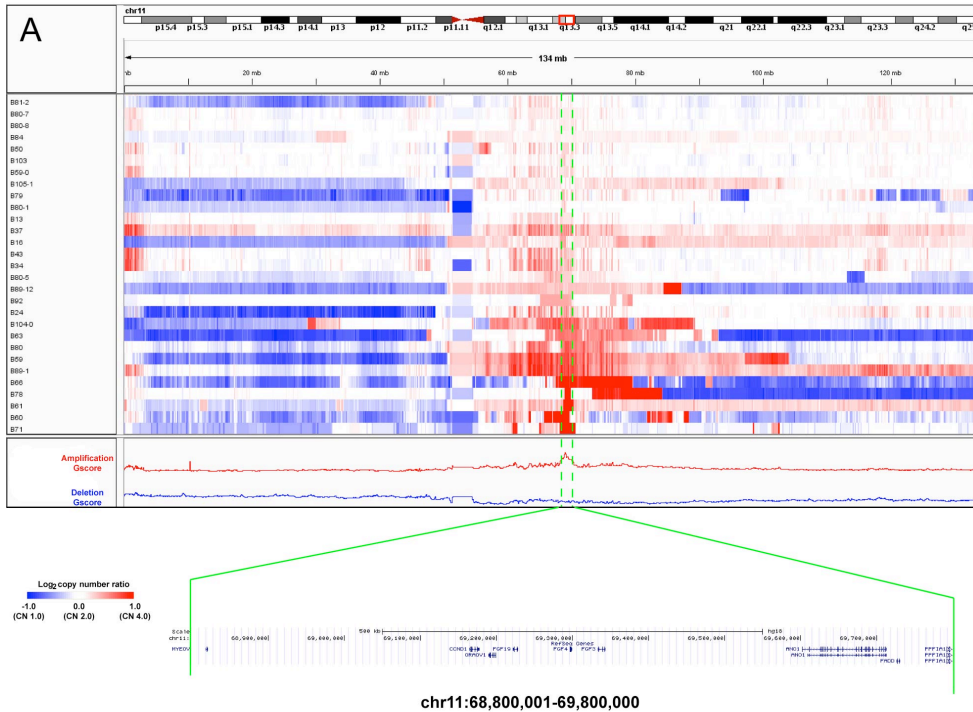

**B**

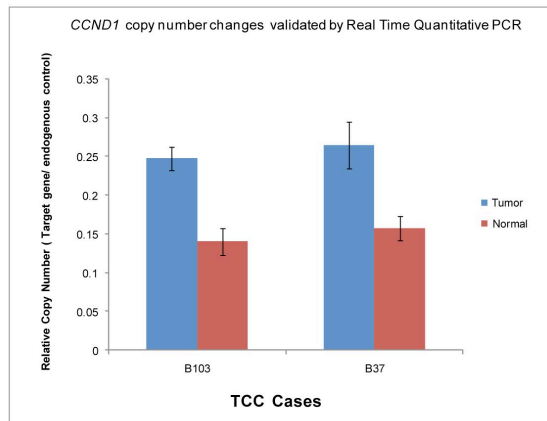

**Supplementary Figure 14. A significant region of focal amplification in chromosome 11 encompassing *CCND1* in TCCs. (a)** G-Score values from GISTIC analysis are shown below the copy number profiles. Output is rendered by the IGV. RefSeq genes mapping to the amplification region are shown below the IGV output. **(b)** Representative examples of validation of recurrent *CCND1* amplification in TCC samples of B103 and B37 by Real time Quantitative PCR.

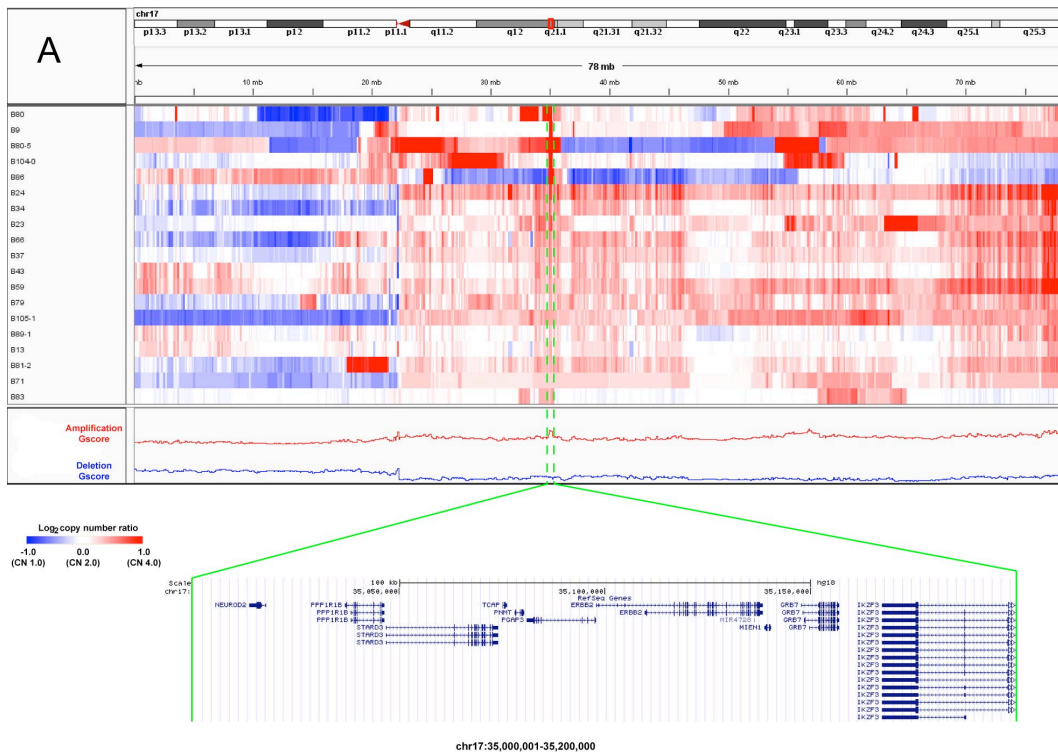

**B**

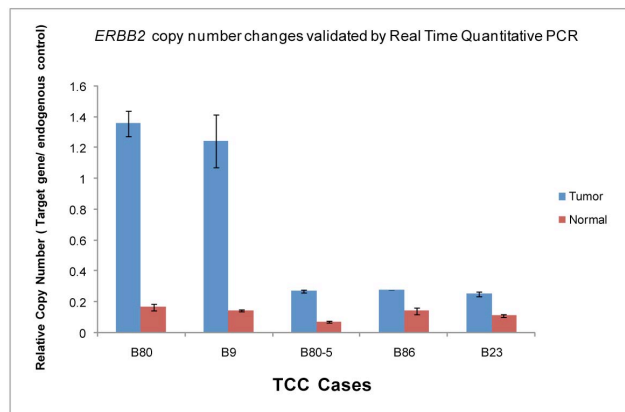

**Supplementary Figure 15. A significant region of focal amplification in chromosome 17 encompassing *ERBB2* in TCCs. (a)** G-Score values from GISTIC analysis are shown below the copy number profiles. Output is rendered by the IGV. RefSeq genes mapping to the amplification region are shown below the IGV output. **(b)** Representative examples of validation of recurrent *ERBB2* amplification in TCC samples of B80, B9, B80-5, B86, and B23 by Real time Quantitative PCR.

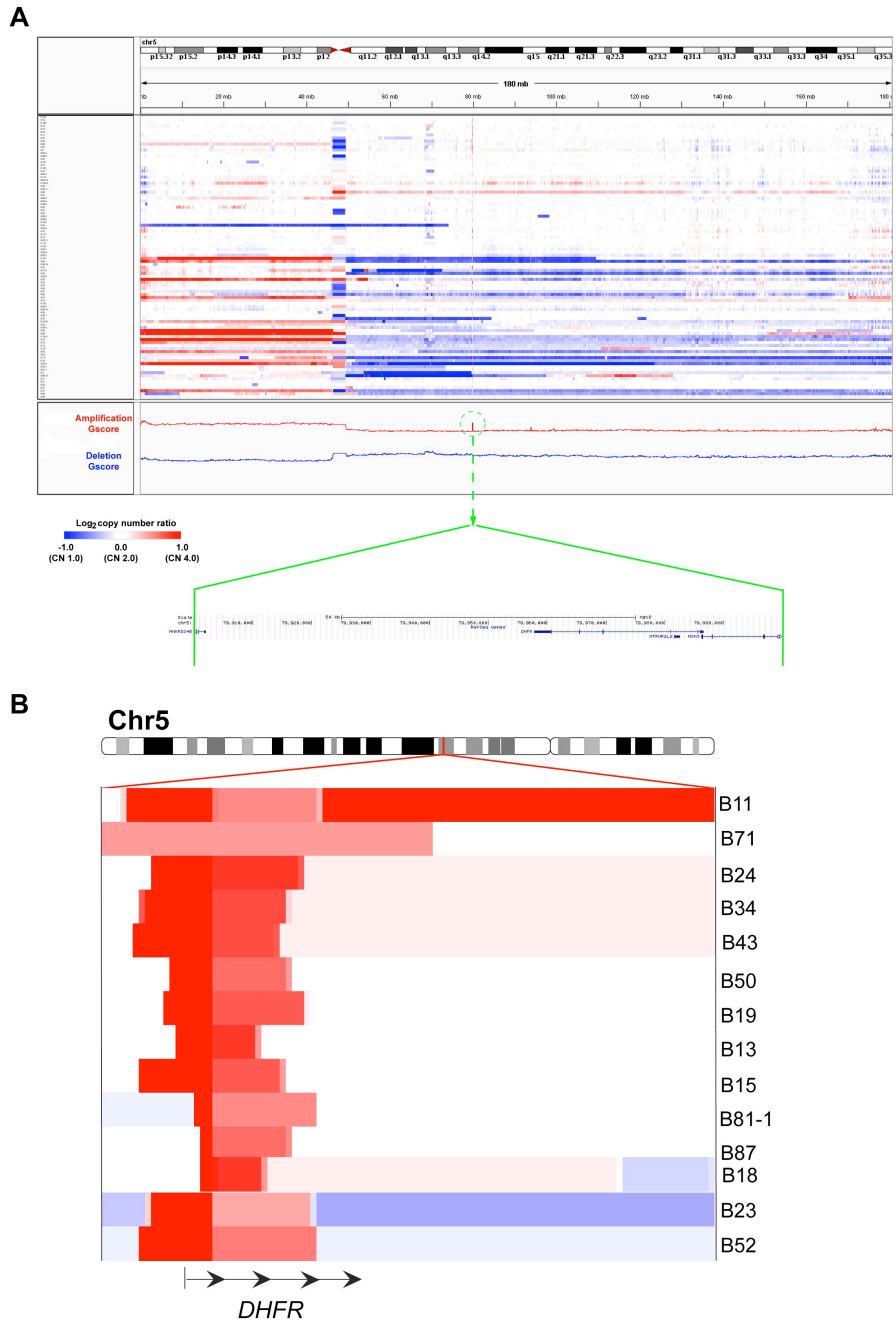

**Supplementary Figure 16. (a)** Frequent amplifications of a region containing *DHFR* in 5q, a frequent loss in TCCs. Output is rendered by the IGV. RefSeq genes mapping to the significant region are shown below the IGV output. **(b)** The relative position of *DHFR* locus and the TCC cases with copy number alterations in *DHFR* are shown at bottom and right of the figure, respectively.

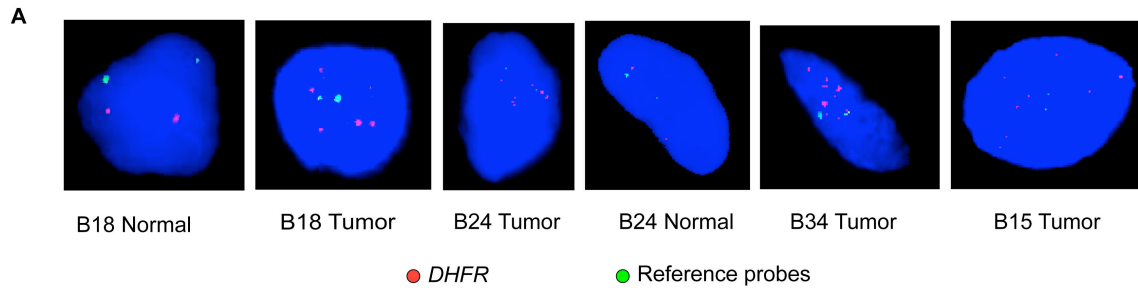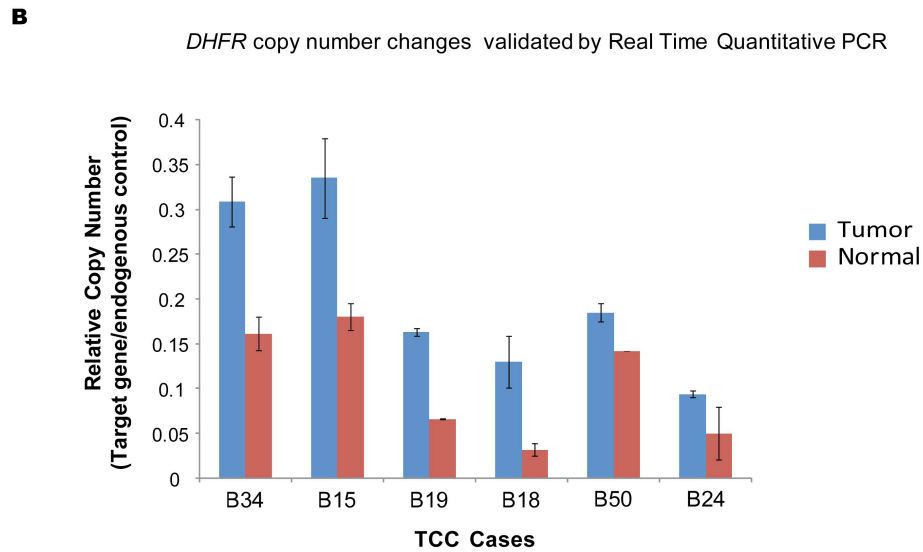

**Supplementary Figure 17. Representative examples of validation of *DHFR* amplification in TCCs by Fluorescence in situ hybridization (a) and Real time quantitative PCR (b).**



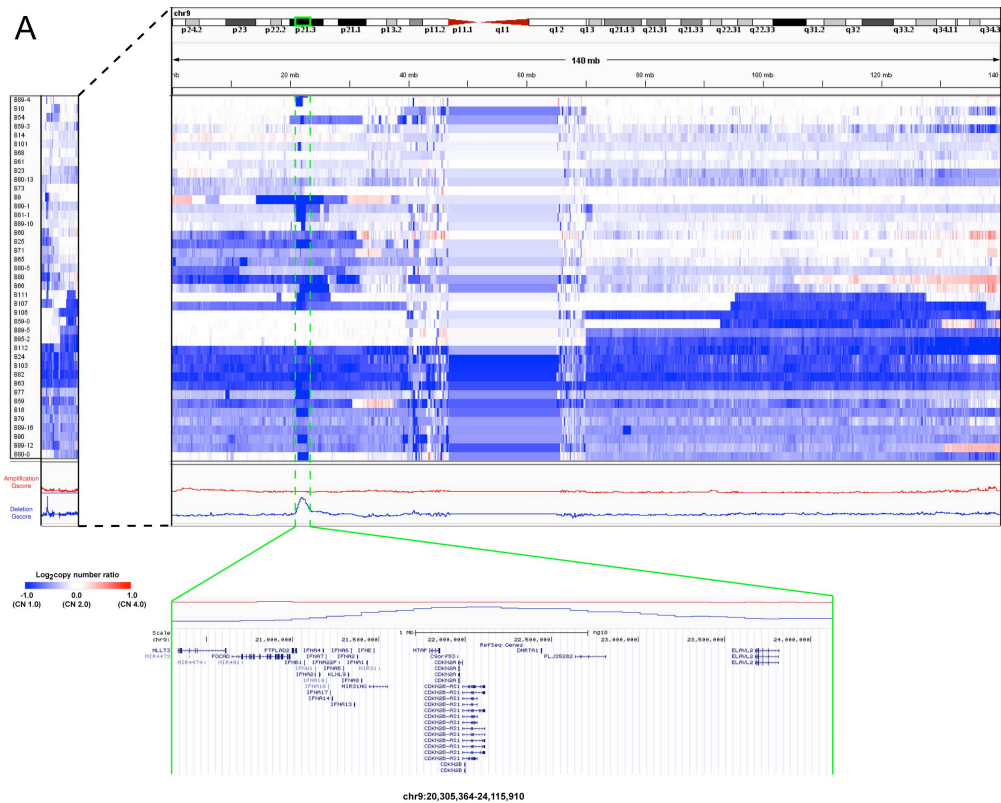

**B**

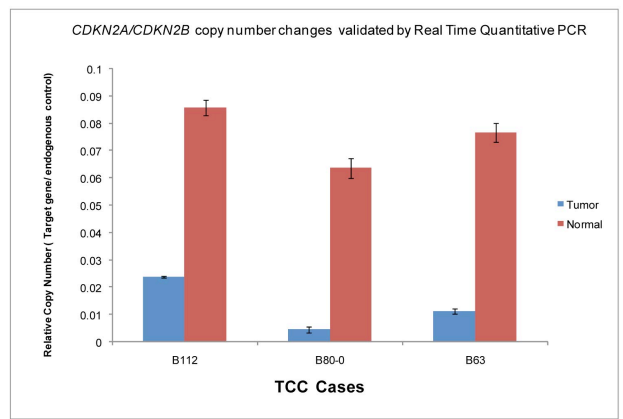

**Supplementary Figure 18. A significant region of focal deletion in chromosome 9 containing *CDKN2A/B* in TCCs. (a)** G-Score values from GISTIC analysis are shown below the copy number profiles. Output is rendered by the IGV. RefSeq genes mapping to the deleted region are shown below the IGV output. **(b)** Representative examples of validation of recurrent *CDKN2A/B* deletion in DNA from TCC samples of B112, B80-0, and B63 by Real time Quantitative PCR.

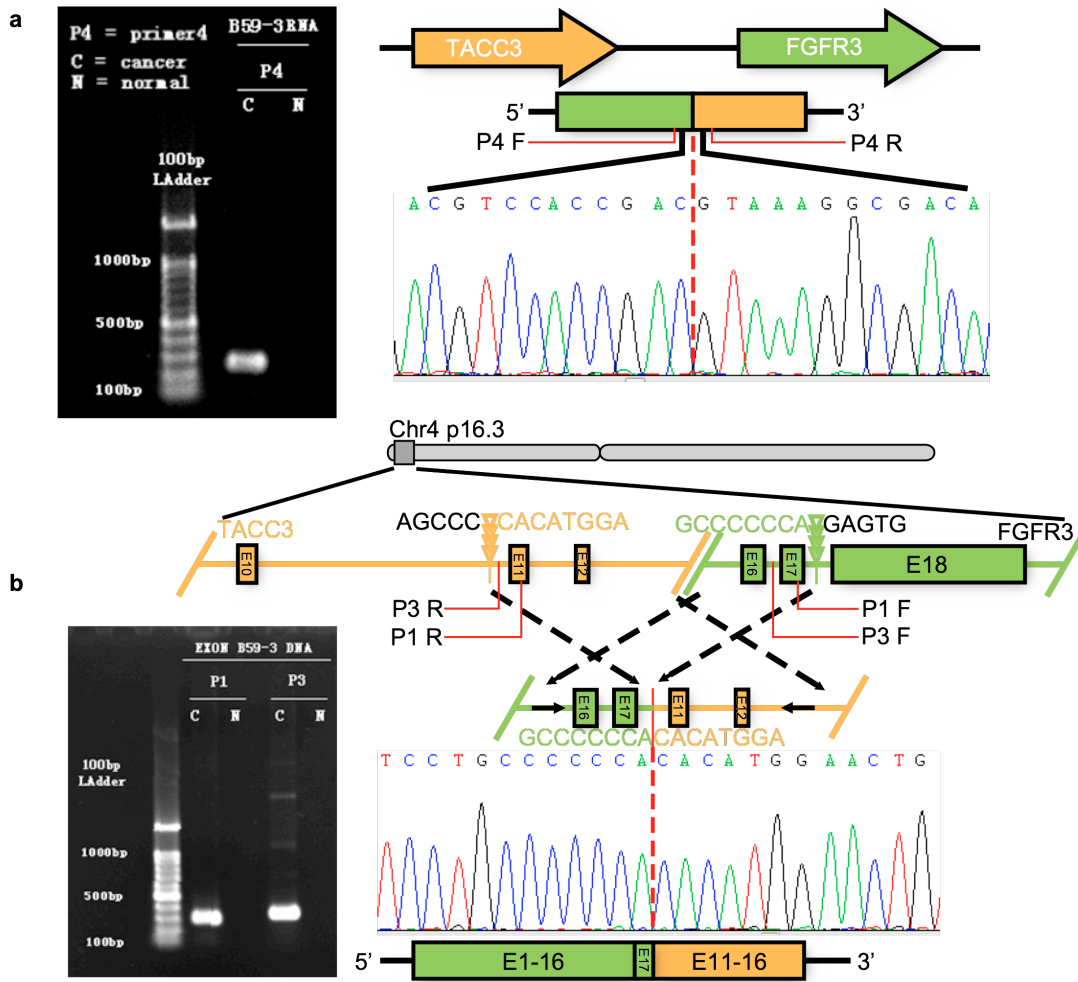

**Supplementary Figure 19. *FGFR3-TACC3* fusion identified in B59-3 tumor. (a)** Left, *FGFR3-TACC3* RT-PCR product from B59-3 tumor and normal cDNA. Right, Sanger sequencing of the RT-PCR product. **(b)** Genomic fusion of *FGFR3* intron 17 with intron 10 of *TACC3* resulting in exon 17 of *FGFR3* being spliced 5' to exon 11 of *TACC3* in the fused mRNA. Triangles indicate the genomic positions of the breakpoints. The detail information on positions and sequences of primers, P1, P3 and P4, was provided in the Supplementary Table 12.



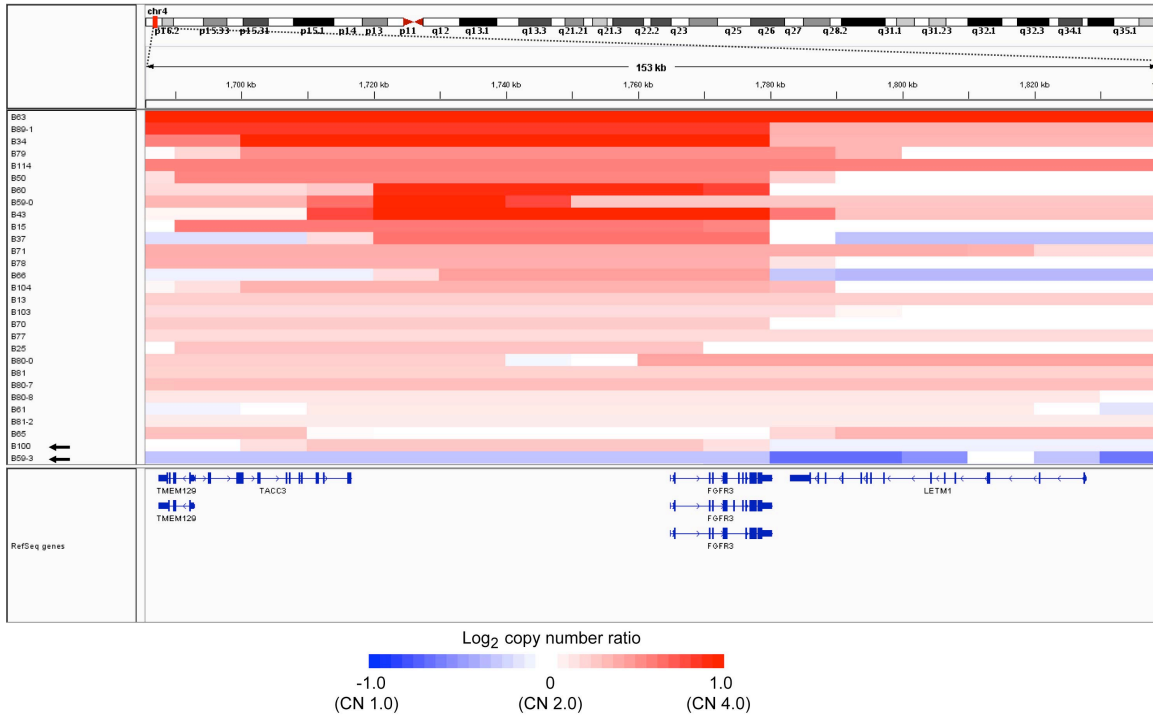

**Supplementary Figure 21. Copy number alterations at *TACC3/FGFR3* locus across samples rendered by the IGV.** RefSeq genes mapping to this region are shown below the IGV output. TCC case IDs are shown to the left of the figure. The arrows indicate the two tumor samples harboring *FGFR3-TACC3* fusion.

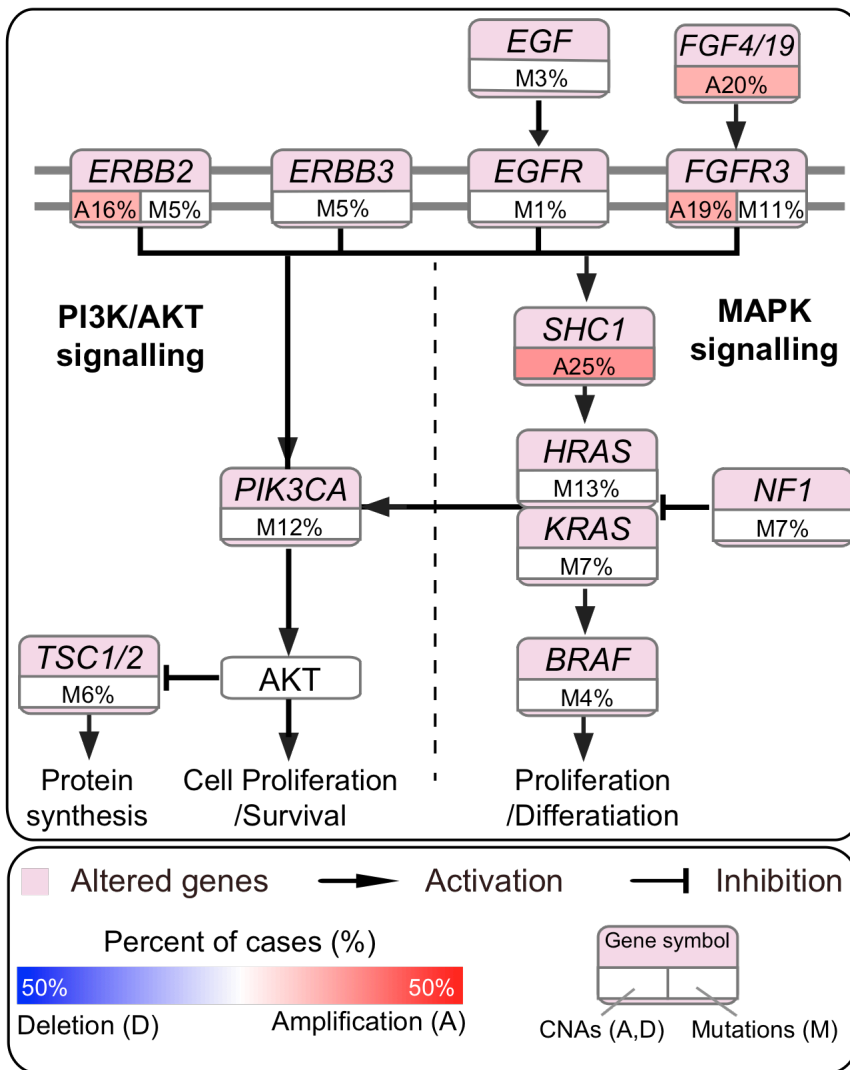

**Supplementary Figure 22. Genetic alterations in TCC frequently occur in genes of PI3K/AKT signaling and Ras-MAPK signaling pathways.** Alterations are defined by somatic mutations, focal amplifications and deletions. Alteration frequencies are expressed as a percentage of all cases. Red denotes amplified genes and blue denotes deleted genes

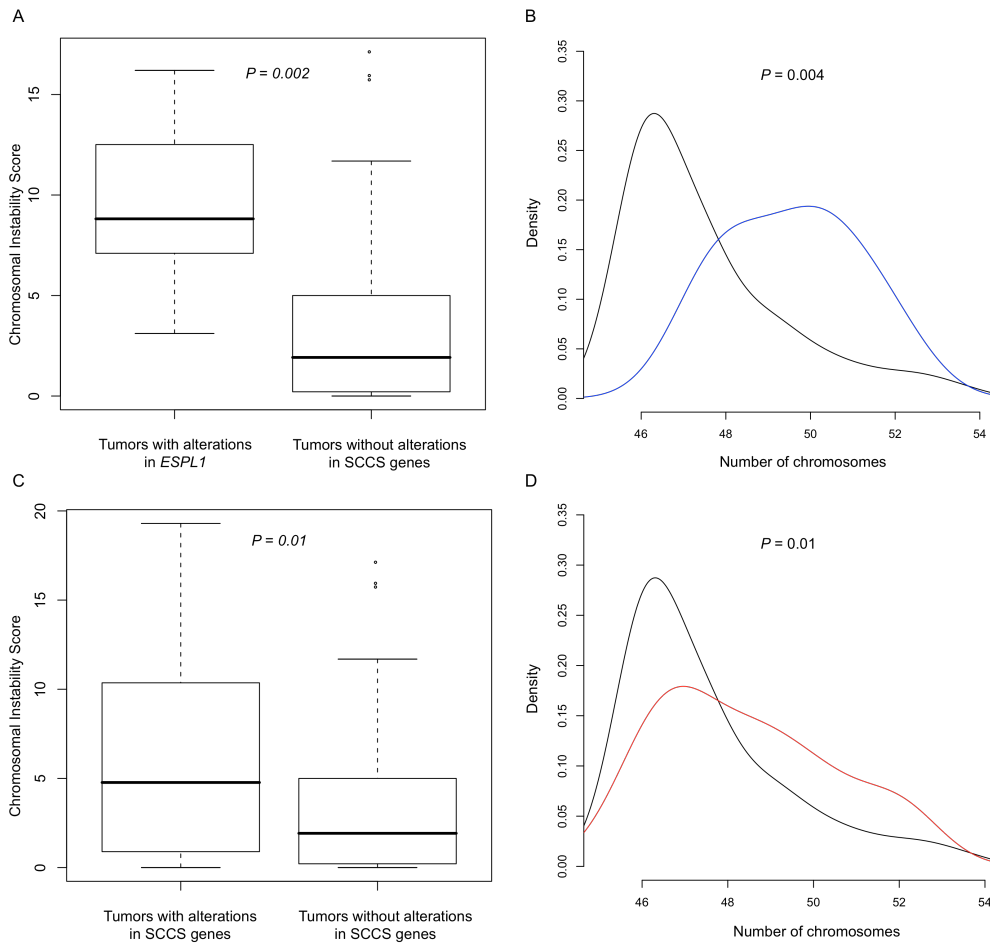

**Supplementary Figure 23. Tumors with alterations in *ESPL1* (a and b) and SCCS genes (c and d) show significantly more aneuploidy than tumors with wild-type SCCS genes.** Chromosome instability is calculated as described in Supplementary Figure 7. Panels c and d showed the kernel density estimation of chromosome counts in tumors with *ESPL1* alterations (blue line), tumors with alterations in SCCS genes (red) and tumors with wild-type SCCS genes (black line). The *P* values were determined by Wilcoxon test.

## Supplementary Tables

**Supplementary Table 1. Clinical characteristics of the 99 TCC patients.**

| Case ID | Sex | Age (year) | TNM     | Grade | Superficial/<br>Invasive | Primary/Relapsed | Analyzed by<br>WES | Analyzed by<br>WGS | Analyzed by<br>RNA-Seq |
|---------|-----|------------|---------|-------|--------------------------|------------------|--------------------|--------------------|------------------------|
| B10     | M   | 52         | T2N0M0  | 2     | Invasive                 | Primary          | Yes                | Yes                | Yes                    |
| B100    | M   | 25         | T1N0M0  | 1     | Superficial              | Primary          | Yes                | Yes                | Yes                    |
| B101    | F   | 69         | T1N0M0  | 1     | Superficial              | Primary          | Yes                | Yes                | Yes                    |
| B102    | M   | 45         | T1N0M0  | 1     | Superficial              | Primary          | Yes                | Yes                | No                     |
| B103    | M   | 54         | T1N0M0  | 1     | Superficial              | Primary          | Yes                | Yes                | No                     |
| B104    | M   | 52         | T2N0M0  | 1     | Invasive                 | Primary          | Yes                | Yes                | No                     |
| B104-0  | M   | 72         | T1N0M0  | 1     | Superficial              | Primary          | Yes                | Yes                | No                     |
| B105    | M   | 62         | T2NxMx  | 1     | Invasive                 | Relapsed         | Yes                | Yes                | No                     |
| B105-0  | M   | 60         | T2NxMx  | 1     | Invasive                 | Primary          | Yes                | Yes                | Yes                    |
| B105-1  | M   | 64         | T2NxMx  | 2     | Invasive                 | Primary          | Yes                | Yes                | Yes                    |
| B106    | M   | 56         | T2NxMx  | 1     | Invasive                 | Primary          | Yes                | Yes                | No                     |
| B107    | M   | 68         | T2NxMx  | 3     | Invasive                 | Primary          | Yes                | Yes                | No                     |
| B109    | M   | 46         | T1N0M0  | 1     | Superficial              | Relapsed         | Yes                | Yes                | No                     |
| B11     | M   | 80         | T4N0M0  | 3     | Invasive                 | Relapsed         | Yes                | Yes                | No                     |
| B110    | M   | 54         | T1N0M0  | 1     | Superficial              | Primary          | Yes                | Yes                | No                     |
| B111    | M   | 45         | T1N0M0  | 1     | Superficial              | Primary          | Yes                | Yes                | No                     |
| B112    | M   | 62         | T3N1M0  | 1     | Invasive                 | Relapsed         | Yes                | Yes                | No                     |
| B114    | M   | 73         | T1bN0M0 | 1     | Superficial              | Primary          | Yes                | Yes                | No                     |
| B13     | M   | 64         | T2N0M0  | 2     | Invasive                 | Primary          | Yes                | Yes                | Yes                    |
| B14     | M   | 57         | T2N0M0  | 2     | Invasive                 | Primary          | Yes                | Yes                | No                     |
| B15     | M   | 40         | T4N0M0  | 2     | Invasive                 | Primary          | Yes                | Yes                | Yes                    |
| B16     | M   | 72         | T1N0M0  | 3     | Superficial              | Primary          | Yes                | Yes                | No                     |
| B18     | M   | 66         | T1N0M0  | 2     | Superficial              | Primary          | Yes                | Yes                | Yes*                   |
| B19     | M   | 69         | T4NXMX  | 3     | Invasive                 | Relapsed         | Yes                | Yes                | No                     |
| B21     | M   | 61         | T2N0M0  | 1     | Invasive                 | Primary          | Yes                | Yes                | No                     |
| B22     | M   | 79         | T4N0M0  | 2     | Invasive                 | Primary          | Yes                | Yes                | Yes                    |
| B23     | M   | 85         | T1N0M0  | 3     | Superficial              | Primary          | Yes                | Yes                | Yes*                   |
| B24     | M   | 53         | T4N0M0  | 1     | Invasive                 | Primary          | Yes                | Yes                | No                     |
| B25     | M   | 65         | T4aN0M0 | 3     | Invasive                 | Relapsed         | Yes                | Yes                | Yes*                   |
| B34     | M   | 66         | T3aN0M0 | 3     | Invasive                 | Primary          | Yes                | Yes                | Yes*                   |
| B35     | M   | 80         | T1N0M0  | 2     | Superficial              | Primary          | Yes                | Yes                | No                     |
| B37     | M   | 71         | T4N0M0  | 3     | Invasive                 | Primary          | Yes                | Yes                | No                     |
| B41     | M   | 69         | T3bN0M0 | 2     | Invasive                 | Primary          | Yes                | Yes                | No                     |
| B43     | M   | 43         | T3aN1M0 | 3     | Invasive                 | Primary          | Yes                | Yes                | No                     |

|        |   |    |         |   |             |          |     |     |      |
|--------|---|----|---------|---|-------------|----------|-----|-----|------|
| B45    | M | 82 | T1bN0M0 | 1 | Superficial | Primary  | Yes | Yes | Yes* |
| B47    | M | 84 | T3aN0M0 | 3 | Invasive    | Primary  | Yes | Yes | No   |
| B5     | M | 53 | T4N0M0  | 2 | Invasive    | Primary  | Yes | Yes | No   |
| B50    | M | 73 | T2bNXMX | 2 | Invasive    | Primary  | Yes | Yes | No   |
| B52    | M | 57 | T3N0M0  | 1 | Invasive    | Primary  | Yes | Yes | Yes* |
| B54    | M | 49 | T4N1M0  | 2 | Invasive    | Primary  | Yes | Yes | Yes* |
| B55    | M | 41 | T3N0M0  | 2 | Invasive    | Primary  | Yes | Yes | No   |
| B56    | M | 41 | T1NxMx  | 2 | Superficial | Primary  | Yes | Yes | Yes* |
| B57    | F | 72 | T2aNxMx | 1 | Invasive    | Primary  | Yes | Yes | Yes* |
| B58    | M | 62 | T2aNxMx | 1 | Invasive    | Primary  | Yes | Yes | No   |
| B59    | F | 67 | T3NxMx  | 2 | Invasive    | Primary  | Yes | Yes | Yes* |
| B59-0  | M | 50 | T2NxMx  | 2 | Invasive    | Primary  | Yes | Yes | Yes  |
| B59-1  | M | 43 | T1N0M0  | 1 | Invasive    | Primary  | Yes | Yes | Yes  |
| B59-3  | M | 65 | T2N0M0  | 2 | Invasive    | Primary  | Yes | Yes | No   |
| B60    | F | 80 | T4N0M0  | 3 | Invasive    | Primary  | Yes | Yes | No   |
| B61    | F | 53 | T3N0M0  | 3 | Invasive    | Primary  | Yes | Yes | No   |
| B62-0  | M | 58 | T1N0M0  | 1 | Superficial | Primary  | Yes | Yes | No   |
| B63    | M | 70 | T2aN0M0 | 3 | Invasive    | Primary  | Yes | Yes | Yes* |
| B64    | M | 66 | T1N0M0  | 1 | Superficial | Primary  | Yes | Yes | Yes* |
| B65    | M | 87 | T3aN0M0 | 2 | Invasive    | Relapsed | Yes | Yes | Yes  |
| B66    | M | 54 | T2N0M0  | 2 | Invasive    | Primary  | Yes | Yes | Yes  |
| B66-0  | F | 50 | TaN0M0  | 3 | Superficial | Primary  | Yes | Yes | Yes  |
| B68    | M | 85 | T2N0M0  | 2 | Invasive    | Primary  | Yes | Yes | Yes* |
| B70    | M | 65 | T2N0M0  | 2 | Invasive    | Primary  | Yes | Yes | Yes  |
| B71    | M | 65 | T2N0M0  | 3 | Invasive    | Relapsed | Yes | Yes | Yes* |
| B73    | M | 44 | T1N0M0  | 1 | Superficial | Relapsed | Yes | Yes | Yes* |
| B74    | M | 60 | T3aN0M0 | 3 | Invasive    | Primary  | Yes | Yes | Yes  |
| B77    | M | 75 | T1N0M0  | 2 | Superficial | Primary  | Yes | Yes | Yes* |
| B78    | M | 80 | TaN0M0  | 2 | Superficial | Primary  | Yes | Yes | No   |
| B79    | M | 63 | T3N0M0  | 2 | Invasive    | Primary  | Yes | Yes | No   |
| B80    | M | 76 | T4aN0M0 | 3 | Invasive    | Primary  | Yes | Yes | No   |
| B80-0  | M | 82 | T1N0M0  | 2 | Superficial | Primary  | Yes | Yes | Yes  |
| B80-1  | M | 58 | T2N0M0  | 2 | Invasive    | Relapsed | Yes | Yes | No   |
| B80-11 | M | 28 | T1N0M0  | 1 | Superficial | Primary  | Yes | Yes | Yes  |
| B80-13 | M | 63 | TaN0M0  | 1 | Superficial | Primary  | Yes | Yes | Yes  |
| B80-3  | M | 51 | T4N0M0  | 2 | Invasive    | Primary  | Yes | Yes | No   |
| B80-4  | M | 54 | T1N0M0  | 1 | Superficial | Primary  | Yes | Yes | Yes  |
| B80-5  | M | 73 | TaN0M0  | 2 | Superficial | Relapsed | Yes | Yes | No   |
| B80-7  | M | 58 | T3N0M0  | 2 | Invasive    | Primary  | Yes | Yes | Yes  |
| B80-8  | F | 63 | T2N0M0  | 3 | Invasive    | Primary  | Yes | Yes | Yes  |
| B81    | M | 63 | T2N0M0  | 3 | Invasive    | Primary  | Yes | Yes | No   |
| B81-1  | M | 62 | T2N0M0  | 1 | Invasive    | Primary  | Yes | Yes | No   |
| B81-2  | M | 61 | T2N0M0  | 2 | Invasive    | Primary  | Yes | Yes | No   |
| B82    | M | 56 | T3N0M0  | 2 | Invasive    | Primary  | Yes | Yes | No   |
| B83    | F | 84 | T3N0M0  | 1 | Invasive    | Primary  | Yes | Yes | No   |



|        |   |    |         |   |             |          |     |     |     |
|--------|---|----|---------|---|-------------|----------|-----|-----|-----|
| B84    | M | 64 | T1N0M0  | 1 | Superficial | Primary  | Yes | Yes | No  |
| B85-0  | M | 76 | TaN0M0  | 1 | Superficial | Primary  | Yes | Yes | Yes |
| B85-2  | M | 74 | TaN0M0  | 1 | Superficial | Primary  | Yes | Yes | No  |
| B86    | M | 48 | T2N0M0  | 1 | Invasive    | Primary  | Yes | Yes | No  |
| B87    | M | 57 | T1N0M0  | 2 | Superficial | Primary  | Yes | Yes | No  |
| B88    | M | 56 | T3N0M0  | 2 | Invasive    | Primary  | Yes | Yes | No  |
| B89-1  | M | 65 | T2N0M0  | 2 | Invasive    | Primary  | Yes | Yes | No  |
| B89-10 | M | 65 | T1N0M0  | 1 | Superficial | Primary  | Yes | Yes | No  |
| B89-11 | F | 38 | T1N0M0  | 1 | Superficial | Primary  | Yes | Yes | No  |
| B89-12 | F | 72 | T2N0M0  | 3 | Invasive    | Primary  | Yes | Yes | Yes |
| B89-16 | M | 68 | T1N0M0  | 1 | Superficial | Primary  | Yes | Yes | No  |
| B89-3  | M | 65 | T3N0M0  | 1 | Invasive    | Primary  | Yes | Yes | No  |
| B89-4  | M | 71 | T1N0M0  | 1 | Superficial | Primary  | Yes | Yes | Yes |
| B89-5  | M | 50 | T1N0M0  | 1 | Superficial | Primary  | Yes | Yes | Yes |
| B9     | M | 81 | T3N0M0  | 3 | Invasive    | Primary  | Yes | Yes | Yes |
| B90    | M | 84 | T1N0M0  | 1 | Superficial | Primary  | Yes | Yes | No  |
| B92    | M | 53 | T3bN1Mx | 3 | Invasive    | Primary  | Yes | Yes | No  |
| B96    | M | 69 | T3N0M0  | 2 | Invasive    | Relapsed | Yes | Yes | No  |
| B98    | M | 63 | T3N1MX  | 3 | Invasive    | Relapsed | Yes | Yes | No  |
| B99    | F | 37 | T1N0M0  | 1 | Superficial | Primary  | Yes | Yes | No  |

\* 16 tumors for which their matched, morphologically normal bladder tissues were analyzed by RNA-Seq

**Supplementary Table 2. Summary statistics of exome sequencing data obtained from 99 TCC tumor-blood pairs.**

| Case   | Sample | Total reads | No. of uniquely mapping reads | % of uniquely mapping reads | No. of reads overlapping targets | % of reads overlapping targets | No. of non-duplicated reads | % of non-duplicated reads | Mean fold coverage | % of targets covered by at least 1x | % of targets covered by at least 8x |
|--------|--------|-------------|-------------------------------|-----------------------------|----------------------------------|--------------------------------|-----------------------------|---------------------------|--------------------|-------------------------------------|-------------------------------------|
| B100   | Blood  | 45,617,985  | 40,496,989                    | 88.77%                      | 34,032,102                       | 74.60%                         | 34,005,589                  | 74.54%                    | 57.48              | 94.26%                              | 81.20%                              |
|        | Tumor  | 51,124,567  | 45,293,589                    | 88.59%                      | 39,293,178                       | 76.86%                         | 39,248,344                  | 76.77%                    | 67.71              | 94.62%                              | 82.48%                              |
| B101   | Blood  | 44,138,427  | 39,322,008                    | 89.09%                      | 31,864,931                       | 72.19%                         | 31,851,613                  | 72.16%                    | 53.70              | 94.29%                              | 80.79%                              |
|        | Tumor  | 50,410,636  | 44,882,254                    | 89.03%                      | 37,312,202                       | 74.02%                         | 37,292,515                  | 73.98%                    | 63.31              | 94.69%                              | 82.19%                              |
| B102   | Blood  | 45,263,458  | 40,323,145                    | 89.09%                      | 32,116,663                       | 70.95%                         | 32,105,997                  | 70.93%                    | 53.56              | 94.08%                              | 80.59%                              |
|        | Tumor  | 41,545,900  | 36,749,548                    | 88.46%                      | 31,268,302                       | 75.26%                         | 31,250,722                  | 75.22%                    | 53.43              | 94.04%                              | 80.57%                              |
| B103   | Blood  | 46,267,339  | 41,172,099                    | 88.99%                      | 34,283,583                       | 74.10%                         | 34,266,234                  | 74.06%                    | 57.73              | 94.07%                              | 80.79%                              |
|        | Tumor  | 43,732,676  | 38,926,751                    | 89.01%                      | 33,278,547                       | 76.10%                         | 33,258,709                  | 76.05%                    | 56.74              | 93.95%                              | 80.58%                              |
| B104-0 | Blood  | 52,154,612  | 46,425,313                    | 89.01%                      | 39,449,141                       | 75.64%                         | 39,422,416                  | 75.59%                    | 67.72              | 94.65%                              | 82.24%                              |
|        | Tumor  | 44,804,931  | 39,723,409                    | 88.66%                      | 34,524,966                       | 77.06%                         | 34,502,803                  | 77.01%                    | 59.23              | 93.68%                              | 80.17%                              |
| B104   | Blood  | 52,699,043  | 46,711,670                    | 88.64%                      | 38,563,344                       | 73.18%                         | 38,544,516                  | 73.14%                    | 65.27              | 94.94%                              | 82.82%                              |
|        | Tumor  | 42,113,127  | 37,346,769                    | 88.68%                      | 32,024,012                       | 76.04%                         | 32,008,020                  | 76.00%                    | 54.46              | 93.99%                              | 80.76%                              |
| B105-0 | Blood  | 45,063,552  | 39,938,424                    | 88.63%                      | 33,189,037                       | 73.65%                         | 33,161,788                  | 73.59%                    | 56.43              | 94.58%                              | 81.69%                              |
|        | Tumor  | 41,380,554  | 36,587,329                    | 88.42%                      | 31,661,597                       | 76.51%                         | 31,624,318                  | 76.42%                    | 54.42              | 93.89%                              | 80.70%                              |
| B105-1 | Blood  | 35,911,495  | 31,769,381                    | 88.47%                      | 27,408,490                       | 76.32%                         | 27,395,371                  | 76.29%                    | 46.94              | 93.48%                              | 78.99%                              |
|        | Tumor  | 34,820,140  | 30,867,364                    | 88.65%                      | 26,983,420                       | 77.49%                         | 26,970,747                  | 77.46%                    | 46.21              | 93.12%                              | 78.28%                              |
| B105   | Blood  | 37,500,548  | 33,275,151                    | 88.73%                      | 28,613,977                       | 76.30%                         | 28,602,095                  | 76.27%                    | 49.14              | 93.60%                              | 79.42%                              |
|        | Tumor  | 34,163,495  | 30,270,455                    | 88.60%                      | 26,458,671                       | 77.45%                         | 26,445,635                  | 77.41%                    | 45.73              | 93.26%                              | 78.50%                              |
| B106   | Blood  | 58,894,536  | 52,249,872                    | 88.72%                      | 42,879,705                       | 72.81%                         | 42,841,712                  | 72.74%                    | 72.71              | 95.59%                              | 84.20%                              |
|        | Tumor  | 43,624,709  | 38,572,318                    | 88.42%                      | 32,710,378                       | 74.98%                         | 32,677,187                  | 74.91%                    | 55.59              | 94.24%                              | 81.37%                              |
| B107   | Blood  | 70,952,075  | 62,915,487                    | 88.67%                      | 51,791,304                       | 72.99%                         | 51,763,063                  | 72.95%                    | 87.81              | 95.92%                              | 85.32%                              |
|        | Tumor  | 52,162,313  | 45,949,891                    | 88.09%                      | 39,083,100                       | 74.93%                         | 39,063,690                  | 74.89%                    | 65.97              | 94.48%                              | 82.45%                              |
| B109   | Blood  | 47,181,321  | 41,732,855                    | 88.45%                      | 35,924,422                       | 76.14%                         | 35,906,525                  | 76.10%                    | 61.90              | 94.50%                              | 82.04%                              |
|        | Tumor  | 60,487,207  | 53,450,846                    | 88.37%                      | 45,124,465                       | 74.60%                         | 45,105,293                  | 74.57%                    | 75.88              | 95.35%                              | 84.40%                              |
| B10    | Blood  | 229,631,568 | 148,875,857                   | 64.83%                      | 92,507,046                       | 40.28%                         | 91,205,579                  | 39.72%                    | 120.57             | 91.61%                              | 74.18%                              |
|        | Tumor  | 226,986,829 | 144,608,247                   | 63.71%                      | 97,098,763                       | 42.78%                         | 95,090,707                  | 41.89%                    | 125.58             | 89.80%                              | 73.54%                              |
| B110   | Blood  | 47,508,793  | 41,953,678                    | 88.31%                      | 36,366,444                       | 76.55%                         | 36,339,092                  | 76.49%                    | 62.91              | 94.55%                              | 82.16%                              |
|        | Tumor  | 44,354,130  | 39,120,994                    | 88.20%                      | 34,152,216                       | 77.00%                         | 34,133,498                  | 76.96%                    | 58.32              | 94.28%                              | 81.93%                              |
| B111   | Blood  | 61,273,322  | 54,419,544                    | 88.81%                      | 45,421,471                       | 74.13%                         | 45,399,250                  | 74.09%                    | 76.86              | 95.46%                              | 84.52%                              |
|        | Tumor  | 53,683,861  | 47,209,498                    | 87.94%                      | 41,008,656                       | 76.39%                         | 40,985,037                  | 76.35%                    | 69.62              | 94.74%                              | 83.02%                              |
| B112   | Blood  | 52,343,024  | 46,403,424                    | 88.65%                      | 37,752,261                       | 72.12%                         | 37,736,477                  | 72.09%                    | 63.24              | 94.97%                              | 82.90%                              |
|        | Tumor  | 54,983,654  | 48,674,405                    | 88.53%                      | 41,169,246                       | 74.88%                         | 41,148,521                  | 74.84%                    | 69.54              | 95.11%                              | 83.68%                              |

|      |       |             |            |        |            |        |            |        |        |        |        |
|------|-------|-------------|------------|--------|------------|--------|------------|--------|--------|--------|--------|
| B114 | Blood | 47,420,568  | 41,882,314 | 88.32% | 36,255,251 | 76.45% | 36,238,049 | 76.42% | 61.70  | 94.49% | 82.21% |
|      | Tumor | 57,644,816  | 50,982,194 | 88.44% | 43,853,397 | 76.08% | 43,834,003 | 76.04% | 73.89  | 94.93% | 83.77% |
| B11  | Blood | 46,665,643  | 41,349,540 | 88.61% | 34,647,057 | 74.25% | 34,630,336 | 74.21% | 58.53  | 94.26% | 81.27% |
|      | Tumor | 46,430,687  | 41,021,602 | 88.35% | 35,181,858 | 75.77% | 35,158,843 | 75.72% | 59.25  | 93.79% | 80.63% |
| B13  | Blood | 46,546,564  | 41,375,612 | 88.89% | 34,662,785 | 74.47% | 34,648,336 | 74.44% | 58.58  | 94.36% | 81.47% |
|      | Tumor | 47,167,148  | 41,928,540 | 88.89% | 35,650,339 | 75.58% | 35,636,195 | 75.55% | 59.95  | 94.02% | 81.27% |
| B14  | Blood | 54,220,107  | 48,201,520 | 88.90% | 40,055,782 | 73.88% | 40,038,534 | 73.84% | 66.96  | 94.66% | 82.77% |
|      | Tumor | 42,665,048  | 37,779,980 | 88.55% | 33,143,006 | 77.68% | 33,127,601 | 77.65% | 56.43  | 93.69% | 80.73% |
| B15  | Blood | 49,014,746  | 43,664,246 | 89.08% | 36,129,533 | 73.71% | 36,108,612 | 73.67% | 60.49  | 94.40% | 81.86% |
|      | Tumor | 45,124,837  | 40,144,798 | 88.96% | 34,666,423 | 76.82% | 34,641,595 | 76.77% | 58.93  | 94.17% | 81.76% |
| B16  | Blood | 46,993,567  | 41,750,046 | 88.84% | 35,204,326 | 74.91% | 35,182,316 | 74.87% | 59.42  | 94.41% | 81.98% |
|      | Tumor | 56,941,058  | 50,260,508 | 88.27% | 43,945,226 | 77.18% | 43,908,471 | 77.11% | 74.41  | 94.77% | 83.45% |
| B18  | Blood | 100,749,288 | 89,541,155 | 88.88% | 75,729,809 | 75.17% | 75,602,936 | 75.04% | 127.72 | 96.48% | 87.87% |
|      | Tumor | 42,016,338  | 37,110,380 | 88.32% | 34,012,790 | 80.95% | 33,938,770 | 80.78% | 59.53  | 93.56% | 81.00% |
| B19  | Blood | 48,606,291  | 43,218,017 | 88.91% | 36,853,459 | 75.82% | 36,826,599 | 75.77% | 62.36  | 94.38% | 82.30% |
|      | Tumor | 43,549,716  | 38,603,105 | 88.64% | 33,223,489 | 76.29% | 33,201,417 | 76.24% | 56.20  | 93.94% | 80.98% |
| B21  | Blood | 48,690,545  | 42,871,015 | 88.05% | 37,439,786 | 76.89% | 37,385,383 | 76.78% | 64.46  | 94.75% | 82.89% |
|      | Tumor | 59,487,105  | 52,526,094 | 88.30% | 43,220,295 | 72.65% | 43,177,925 | 72.58% | 71.82  | 94.65% | 83.20% |
| B22  | Blood | 48,511,146  | 42,825,915 | 88.28% | 36,358,321 | 74.95% | 36,330,588 | 74.89% | 61.04  | 94.23% | 81.71% |
|      | Tumor | 46,441,414  | 41,048,961 | 88.39% | 36,294,365 | 78.15% | 36,263,535 | 78.08% | 61.57  | 93.76% | 81.31% |
| B23  | Blood | 66,279,539  | 58,629,547 | 88.46% | 49,139,325 | 74.14% | 49,095,720 | 74.07% | 82.21  | 95.14% | 84.46% |
|      | Tumor | 43,142,095  | 38,148,487 | 88.43% | 33,988,425 | 78.78% | 33,946,498 | 78.69% | 58.29  | 93.47% | 80.36% |
| B24  | Blood | 55,517,532  | 49,035,505 | 88.32% | 41,731,649 | 75.17% | 41,682,965 | 75.08% | 70.21  | 94.67% | 83.34% |
|      | Tumor | 44,227,141  | 38,881,680 | 87.91% | 34,614,180 | 78.26% | 34,557,885 | 78.14% | 59.33  | 93.53% | 80.61% |
| B25  | Blood | 58,633,085  | 51,581,352 | 87.97% | 42,860,658 | 73.10% | 42,809,834 | 73.01% | 71.50  | 94.72% | 83.20% |
|      | Tumor | 51,593,229  | 45,328,260 | 87.86% | 39,423,086 | 76.41% | 39,358,114 | 76.29% | 66.83  | 94.40% | 82.69% |
| B34  | Blood | 66,839,880  | 58,798,829 | 87.97% | 49,245,308 | 73.68% | 49,194,401 | 73.60% | 82.82  | 95.25% | 84.36% |
|      | Tumor | 55,645,505  | 48,291,248 | 86.78% | 43,176,055 | 77.59% | 43,117,951 | 77.49% | 73.72  | 94.58% | 83.22% |
| B35  | Blood | 43,491,937  | 38,228,772 | 87.90% | 34,207,951 | 78.65% | 34,154,882 | 78.53% | 58.90  | 93.83% | 81.16% |
|      | Tumor | 53,759,172  | 47,446,247 | 88.26% | 41,908,383 | 77.96% | 41,855,879 | 77.86% | 71.33  | 94.47% | 83.09% |
| B37  | Blood | 61,848,069  | 54,716,513 | 88.47% | 45,962,891 | 74.32% | 45,921,956 | 74.25% | 77.27  | 95.22% | 84.33% |
|      | Tumor | 44,818,501  | 39,503,157 | 88.14% | 35,585,399 | 79.40% | 35,530,801 | 79.28% | 61.68  | 93.74% | 81.22% |
| B41  | Blood | 50,957,146  | 45,067,578 | 88.44% | 37,133,765 | 72.87% | 37,109,470 | 72.82% | 62.21  | 94.55% | 81.94% |
|      | Tumor | 44,391,297  | 38,850,982 | 87.52% | 34,420,392 | 77.54% | 34,383,381 | 77.46% | 59.20  | 94.01% | 81.31% |
| B43  | Blood | 49,259,758  | 43,609,248 | 88.53% | 37,812,973 | 76.76% | 37,778,315 | 76.69% | 63.98  | 93.75% | 81.56% |
|      | Tumor | 42,083,008  | 37,115,188 | 88.20% | 32,570,488 | 77.40% | 32,542,273 | 77.33% | 55.18  | 93.68% | 80.64% |
| B45  | Blood | 58,777,387  | 52,025,900 | 88.51% | 44,717,528 | 76.08% | 44,677,411 | 76.01% | 75.54  | 94.60% | 83.61% |
|      | Tumor | 45,046,526  | 39,831,899 | 88.42% | 34,915,185 | 77.51% | 34,884,810 | 77.44% | 59.31  | 94.06% | 81.57% |
| B47  | Blood | 48,657,208  | 43,283,896 | 88.96% | 36,316,088 | 74.64% | 36,291,456 | 74.59% | 60.86  | 93.92% | 81.38% |
|      |       |             |            | 88.95% | 34,360,576 | 75.54% | 34,339,721 | 75.49% | 57.56  | 93.50% | 80.45% |

|       |       |             |             |        |             |        |             |        |        |        |        |
|-------|-------|-------------|-------------|--------|-------------|--------|-------------|--------|--------|--------|--------|
| B50   | Blood | 49,374,135  | 44,440,762  | 90.01% | 35,776,889  | 72.46% | 35,763,412  | 72.43% | 59.60  | 85.68% | 75.97% |
|       | Tumor | 41,330,797  | 37,130,481  | 89.84% | 31,440,333  | 76.07% | 31,425,674  | 76.03% | 52.94  | 84.35% | 74.63% |
| B52   | Blood | 68,791,077  | 61,872,496  | 89.94% | 52,691,505  | 76.60% | 52,637,692  | 76.52% | 89.05  | 86.58% | 78.17% |
|       | Tumor | 43,643,559  | 39,337,523  | 90.13% | 34,255,807  | 78.49% | 34,219,457  | 78.41% | 58.20  | 84.30% | 75.38% |
| B54   | Blood | 76,449,440  | 68,738,910  | 89.91% | 57,305,436  | 74.96% | 57,264,297  | 74.90% | 96.47  | 87.58% | 78.83% |
|       | Tumor | 47,223,820  | 42,339,739  | 89.66% | 36,158,383  | 76.57% | 36,132,740  | 76.51% | 61.18  | 85.46% | 76.67% |
| B55   | Blood | 44,824,273  | 40,151,167  | 89.57% | 33,645,417  | 75.06% | 33,614,730  | 74.99% | 56.20  | 84.66% | 75.56% |
|       | Tumor | 39,554,480  | 35,286,746  | 89.21% | 30,774,069  | 77.80% | 30,739,454  | 77.71% | 52.02  | 84.37% | 75.42% |
| B56   | Blood | 46,989,685  | 41,661,154  | 88.66% | 34,748,836  | 73.95% | 34,737,947  | 73.93% | 58.63  | 94.29% | 81.90% |
|       | Tumor | 46,650,304  | 41,357,090  | 88.65% | 36,132,719  | 77.45% | 36,115,906  | 77.42% | 61.59  | 94.09% | 81.70% |
| B57   | Blood | 64,667,175  | 57,809,318  | 89.40% | 44,017,356  | 68.07% | 44,005,616  | 68.05% | 72.25  | 94.69% | 82.72% |
|       | Tumor | 72,098,051  | 64,335,091  | 89.23% | 51,937,822  | 72.04% | 51,917,135  | 72.01% | 87.01  | 95.41% | 84.63% |
| B58   | Blood | 49,652,614  | 44,664,546  | 89.95% | 33,500,946  | 67.47% | 33,489,619  | 67.45% | 56.62  | 87.48% | 76.17% |
|       | Tumor | 58,125,899  | 52,304,209  | 89.98% | 39,048,495  | 67.18% | 39,033,250  | 67.15% | 65.97  | 88.23% | 77.06% |
| B59-0 | Blood | 167,080,953 | 149,547,513 | 89.51% | 113,349,553 | 67.84% | 113,271,393 | 67.79% | 187.79 | 97.77% | 90.05% |
|       | Tumor | 49,125,439  | 43,472,530  | 88.49% | 37,187,412  | 75.70% | 37,164,910  | 75.65% | 63.52  | 94.62% | 82.46% |
| B59-1 | Blood | 137,649,299 | 123,185,036 | 89.49% | 93,517,884  | 67.94% | 93,456,579  | 67.89% | 154.29 | 97.35% | 89.17% |
|       | Tumor | 44,183,802  | 39,259,877  | 88.86% | 32,869,941  | 74.39% | 32,856,148  | 74.36% | 54.89  | 93.91% | 81.04% |
| B59-3 | Blood | 49,031,727  | 43,202,843  | 88.11% | 37,548,743  | 76.58% | 37,527,080  | 76.54% | 64.04  | 94.44% | 82.46% |
|       | Tumor | 76,507,731  | 67,485,052  | 88.21% | 58,015,306  | 75.83% | 57,969,450  | 75.77% | 98.79  | 95.83% | 85.79% |
| B59   | Blood | 111,176,027 | 99,277,954  | 89.30% | 79,247,134  | 71.28% | 79,198,191  | 71.24% | 132.17 | 96.46% | 87.58% |
|       | Tumor | 49,150,881  | 43,690,877  | 88.89% | 37,766,092  | 76.84% | 37,744,592  | 76.79% | 64.41  | 94.05% | 81.66% |
| B5    | Blood | 48,811,053  | 43,382,960  | 88.88% | 35,534,224  | 72.80% | 35,520,497  | 72.77% | 59.65  | 94.55% | 82.12% |
|       | Tumor | 43,936,513  | 39,143,033  | 89.09% | 32,905,219  | 74.89% | 32,890,032  | 74.86% | 55.62  | 93.32% | 79.80% |
| B60   | Blood | 80,248,373  | 71,502,639  | 89.10% | 56,222,354  | 70.06% | 56,189,983  | 70.02% | 93.55  | 95.79% | 85.67% |
|       | Tumor | 42,814,091  | 38,002,718  | 88.76% | 32,155,352  | 75.10% | 32,138,765  | 75.07% | 54.16  | 93.47% | 80.11% |
| B61   | Blood | 46,303,733  | 41,165,887  | 88.90% | 32,857,706  | 70.96% | 32,835,077  | 70.91% | 53.92  | 93.62% | 79.98% |
|       | Tumor | 95,398,474  | 85,263,403  | 89.38% | 71,355,210  | 74.80% | 71,293,146  | 74.73% | 120.48 | 96.09% | 87.12% |
| B62-0 | Blood | 44,384,037  | 39,027,182  | 87.93% | 33,997,333  | 76.60% | 33,975,303  | 76.55% | 57.54  | 93.97% | 81.44% |
|       | Tumor | 40,626,585  | 35,735,130  | 87.96% | 32,033,281  | 78.85% | 32,012,141  | 78.80% | 54.91  | 93.71% | 80.91% |
| B63   | Blood | 51,875,901  | 46,180,626  | 89.02% | 35,815,977  | 69.04% | 35,800,566  | 69.01% | 59.78  | 94.60% | 81.64% |
|       | Tumor | 65,200,088  | 57,893,496  | 88.79% | 45,438,709  | 69.69% | 45,416,048  | 69.66% | 75.82  | 95.05% | 83.30% |
| B64   | Blood | 52,803,660  | 47,168,486  | 89.33% | 35,414,529  | 67.07% | 35,402,991  | 67.05% | 58.72  | 94.49% | 81.10% |
|       | Tumor | 59,111,245  | 52,792,786  | 89.31% | 41,410,464  | 70.06% | 41,393,102  | 70.03% | 69.58  | 94.83% | 82.67% |
| B65   | Blood | 47,674,102  | 42,537,638  | 89.23% | 33,139,874  | 69.51% | 33,129,044  | 69.49% | 54.58  | 94.47% | 81.14% |
|       | Tumor | 50,599,805  | 45,186,876  | 89.30% | 35,760,281  | 70.67% | 35,747,928  | 70.65% | 59.10  | 94.47% | 81.20% |
| B66-0 | Blood | 57,736,322  | 51,378,470  | 88.99% | 42,532,843  | 73.67% | 42,511,993  | 73.63% | 71.36  | 94.84% | 83.29% |
|       | Tumor | 43,046,702  | 38,361,170  | 89.12% | 32,254,784  | 74.93% | 32,240,370  | 74.90% | 54.20  | 93.51% | 80.25% |
| B66   | Blood | 57,579,002  | 51,165,953  | 88.86% | 41,093,677  | 71.37% | 41,075,861  | 71.34% | 68.28  | 94.68% | 82.53% |
|       | Tumor | 46,757,595  | 41,486,539  | 88.73% | 34,906,578  | 74.65% | 34,894,479  | 74.63% | 58.50  | 94.03% | 81.04% |

|        |       |            |            |        |            |        |            |        |        |        |        |
|--------|-------|------------|------------|--------|------------|--------|------------|--------|--------|--------|--------|
| B68    | Blood | 49,754,669 | 44,002,011 | 88.44% | 37,266,518 | 74.90% | 37,250,511 | 74.87% | 62.79  | 94.44% | 82.39% |
|        | Tumor | 50,945,337 | 45,315,819 | 88.95% | 39,067,520 | 76.69% | 39,047,111 | 76.65% | 66.07  | 94.13% | 82.07% |
| B70    | Blood | 42,232,983 | 37,389,630 | 88.53% | 32,049,110 | 75.89% | 32,036,603 | 75.86% | 54.19  | 94.38% | 81.61% |
|        | Tumor | 99,480,442 | 88,649,068 | 89.11% | 71,259,056 | 71.63% | 71,224,108 | 71.60% | 118.68 | 96.73% | 87.89% |
| B71    | Blood | 53,324,333 | 47,541,007 | 89.15% | 38,993,264 | 73.12% | 38,981,421 | 73.10% | 64.98  | 94.46% | 81.94% |
|        | Tumor | 93,956,748 | 83,795,096 | 89.18% | 68,324,649 | 72.72% | 68,290,593 | 72.68% | 114.07 | 96.09% | 86.50% |
| B73    | Blood | 56,788,999 | 50,365,739 | 88.69% | 42,012,047 | 73.98% | 41,991,665 | 73.94% | 70.59  | 94.93% | 83.35% |
|        | Tumor | 42,550,519 | 37,685,591 | 88.57% | 32,655,630 | 76.75% | 32,640,529 | 76.71% | 55.17  | 93.83% | 80.80% |
| B74    | Blood | 47,108,015 | 41,692,624 | 88.50% | 36,200,647 | 76.85% | 36,183,149 | 76.81% | 61.03  | 93.89% | 81.39% |
|        | Tumor | 42,878,186 | 37,888,642 | 88.36% | 33,530,275 | 78.20% | 33,513,007 | 78.16% | 57.01  | 93.58% | 80.49% |
| B77    | Blood | 37,458,705 | 33,247,122 | 88.76% | 28,287,865 | 75.52% | 28,278,892 | 75.49% | 47.30  | 93.03% | 78.23% |
|        | Tumor | 34,070,890 | 30,246,295 | 88.77% | 26,534,101 | 77.88% | 26,524,182 | 77.85% | 44.84  | 92.62% | 77.08% |
| B78    | Blood | 47,592,512 | 42,451,404 | 89.20% | 34,445,131 | 72.38% | 34,435,251 | 72.35% | 57.88  | 94.72% | 81.65% |
|        | Tumor | 61,619,658 | 55,300,355 | 89.74% | 44,514,899 | 72.24% | 44,497,727 | 72.21% | 74.60  | 95.35% | 83.57% |
| B79    | Blood | 48,181,622 | 43,365,266 | 90.00% | 35,344,134 | 73.36% | 35,327,711 | 73.32% | 59.72  | 86.61% | 76.76% |
|        | Tumor | 67,388,031 | 60,610,312 | 89.94% | 48,508,822 | 71.98% | 48,488,839 | 71.95% | 80.81  | 87.52% | 78.04% |
| B80-0  | Blood | 47,754,749 | 42,286,920 | 88.55% | 36,089,699 | 75.57% | 36,072,069 | 75.54% | 61.35  | 94.66% | 82.45% |
|        | Tumor | 52,649,903 | 46,224,412 | 87.80% | 40,178,117 | 76.31% | 40,151,099 | 76.26% | 68.86  | 94.46% | 82.27% |
| B80-11 | Blood | 54,957,784 | 49,367,950 | 89.83% | 41,333,136 | 75.21% | 41,314,816 | 75.18% | 70.04  | 86.75% | 77.64% |
|        | Tumor | 43,149,143 | 38,741,707 | 89.79% | 33,111,771 | 76.74% | 33,098,262 | 76.71% | 56.40  | 85.88% | 76.57% |
| B80-13 | Blood | 46,716,227 | 42,031,132 | 89.97% | 34,086,150 | 72.96% | 34,074,349 | 72.94% | 57.14  | 86.13% | 76.35% |
|        | Tumor | 43,464,970 | 39,111,213 | 89.98% | 32,681,825 | 75.19% | 32,668,975 | 75.16% | 55.36  | 86.01% | 76.36% |
| B80-1  | Blood | 51,366,325 | 46,248,876 | 90.04% | 37,019,911 | 72.07% | 37,001,671 | 72.03% | 62.36  | 87.10% | 77.22% |
|        | Tumor | 77,700,562 | 69,656,632 | 89.65% | 59,387,746 | 76.43% | 59,291,998 | 76.31% | 103.60 | 89.27% | 79.52% |
| B80-3  | Blood | 52,900,369 | 47,707,993 | 90.18% | 39,527,588 | 74.72% | 39,508,896 | 74.69% | 66.62  | 86.34% | 77.14% |
|        | Tumor | 47,580,024 | 42,747,958 | 89.84% | 37,241,920 | 78.27% | 37,218,337 | 78.22% | 64.14  | 86.00% | 77.00% |
| B80-4  | Blood | 72,059,203 | 64,646,618 | 89.71% | 54,710,786 | 75.92% | 54,672,965 | 75.87% | 93.04  | 87.89% | 78.94% |
|        | Tumor | 43,080,107 | 38,376,526 | 89.08% | 34,067,348 | 79.08% | 34,034,576 | 79.00% | 59.19  | 85.78% | 76.35% |
| B80-5  | Blood | 40,539,502 | 36,231,560 | 89.37% | 30,950,258 | 76.35% | 30,935,602 | 76.31% | 53.04  | 86.11% | 76.34% |
|        | Tumor | 43,622,631 | 38,856,682 | 89.07% | 33,715,224 | 77.29% | 33,694,960 | 77.24% | 57.63  | 85.85% | 76.37% |
| B80-7  | Blood | 46,955,908 | 41,660,525 | 88.72% | 33,856,054 | 72.10% | 33,844,276 | 72.08% | 56.68  | 94.54% | 81.71% |
|        | Tumor | 46,002,639 | 40,708,101 | 88.49% | 33,918,835 | 73.73% | 33,905,013 | 73.70% | 56.84  | 94.40% | 81.70% |
| B80-8  | Blood | 41,165,810 | 36,666,755 | 89.07% | 32,716,876 | 79.48% | 32,685,268 | 79.40% | 56.76  | 85.37% | 76.07% |
|        | Tumor | 59,154,275 | 52,961,585 | 89.53% | 44,904,109 | 75.91% | 44,876,163 | 75.86% | 75.62  | 86.36% | 77.63% |
| B80    | Blood | 61,184,451 | 54,594,265 | 89.23% | 44,686,046 | 73.03% | 44,660,658 | 72.99% | 75.02  | 87.15% | 77.63% |
|        | Tumor | 43,229,595 | 38,688,321 | 89.49% | 33,162,462 | 76.71% | 33,141,004 | 76.66% | 56.41  | 85.80% | 75.93% |
| B81-1  | Blood | 56,554,773 | 50,837,069 | 89.89% | 42,193,903 | 74.61% | 42,165,274 | 74.56% | 71.40  | 87.00% | 77.59% |
|        | Tumor | 40,868,414 | 36,597,935 | 89.55% | 32,075,954 | 78.49% | 32,040,109 | 78.40% | 55.36  | 85.65% | 75.75% |
| B81-2  | Blood | 36,913,695 | 32,487,150 | 88.01% | 28,983,222 | 78.52% | 28,948,992 | 78.42% | 47.56  | 85.45% | 75.22% |
|        | Tumor | 53,226,251 | 46,604,084 | 87.56% | 40,605,308 | 76.29% | 40,548,256 | 76.18% | 65.60  | 86.82% | 77.26% |

|        |       |            |            |        |            |        |            |        |       |        |        |
|--------|-------|------------|------------|--------|------------|--------|------------|--------|-------|--------|--------|
| B81    | Blood | 45,223,712 | 40,893,009 | 90.42% | 32,352,278 | 71.54% | 32,338,910 | 71.51% | 53.88 | 85.57% | 75.11% |
|        | Tumor | 51,725,700 | 46,536,914 | 89.97% | 40,533,216 | 78.36% | 40,493,870 | 78.29% | 69.89 | 86.24% | 77.27% |
| B82    | Blood | 43,219,455 | 38,790,632 | 89.75% | 32,688,652 | 75.63% | 32,672,045 | 75.60% | 55.34 | 85.55% | 75.91% |
|        | Tumor | 54,231,825 | 48,351,469 | 89.16% | 42,066,143 | 77.57% | 42,026,790 | 77.49% | 72.85 | 87.02% | 77.44% |
| B83    | Blood | 42,524,603 | 38,144,439 | 89.70% | 31,709,663 | 74.57% | 31,700,417 | 74.55% | 53.19 | 85.16% | 75.08% |
|        | Tumor | 46,340,605 | 41,386,217 | 89.31% | 35,012,201 | 75.55% | 34,997,919 | 75.52% | 59.23 | 85.80% | 76.14% |
| B84    | Blood | 51,466,199 | 45,692,836 | 88.78% | 38,374,584 | 74.56% | 38,354,538 | 74.52% | 65.14 | 94.93% | 83.05% |
|        | Tumor | 41,980,471 | 37,165,967 | 88.53% | 32,132,654 | 76.54% | 32,115,215 | 76.50% | 54.82 | 94.07% | 81.05% |
| B85-0  | Blood | 43,727,077 | 39,351,213 | 89.99% | 31,496,885 | 72.03% | 31,484,085 | 72.00% | 53.01 | 86.43% | 76.30% |
|        | Tumor | 65,156,567 | 58,588,691 | 89.92% | 48,507,649 | 74.45% | 48,483,632 | 74.41% | 81.96 | 87.87% | 78.64% |
| B85-2  | Blood | 43,680,383 | 39,185,687 | 89.71% | 32,384,072 | 74.14% | 32,372,214 | 74.11% | 54.49 | 85.74% | 76.13% |
|        | Tumor | 75,794,724 | 67,953,085 | 89.65% | 57,012,635 | 75.22% | 56,982,348 | 75.18% | 96.26 | 88.11% | 78.98% |
| B86    | Blood | 48,517,271 | 43,150,618 | 88.94% | 36,480,290 | 75.19% | 36,434,565 | 75.10% | 61.78 | 85.26% | 75.66% |
|        | Tumor | 39,939,558 | 35,764,275 | 89.55% | 31,534,428 | 78.96% | 31,459,140 | 78.77% | 55.33 | 84.62% | 74.31% |
| B87    | Blood | 48,233,225 | 43,410,182 | 90.00% | 34,563,251 | 71.66% | 34,551,293 | 71.63% | 57.82 | 85.99% | 75.90% |
|        | Tumor | 56,078,166 | 50,364,900 | 89.81% | 41,761,862 | 74.47% | 41,744,193 | 74.44% | 70.36 | 86.73% | 77.67% |
| B88    | Blood | 45,446,225 | 40,336,917 | 88.76% | 33,155,079 | 72.95% | 33,141,679 | 72.93% | 55.66 | 94.28% | 81.36% |
|        | Tumor | 51,901,684 | 46,022,290 | 88.67% | 38,685,408 | 74.54% | 38,664,809 | 74.50% | 65.20 | 94.62% | 82.83% |
| B89-10 | Blood | 42,737,041 | 38,427,418 | 89.92% | 31,909,494 | 74.66% | 31,888,474 | 74.62% | 53.78 | 85.28% | 75.63% |
|        | Tumor | 52,939,875 | 47,612,645 | 89.94% | 40,913,711 | 77.28% | 40,873,397 | 77.21% | 70.27 | 86.66% | 77.62% |
| B89-11 | Blood | 43,145,083 | 38,577,278 | 89.41% | 34,115,952 | 79.07% | 34,090,341 | 79.01% | 58.99 | 85.43% | 76.10% |
|        | Tumor | 63,317,759 | 56,762,216 | 89.65% | 48,251,018 | 76.20% | 48,222,537 | 76.16% | 81.61 | 86.91% | 78.12% |
| B89-12 | Blood | 44,789,466 | 39,821,330 | 88.91% | 33,274,727 | 74.29% | 33,260,599 | 74.26% | 56.19 | 86.07% | 76.47% |
|        | Tumor | 46,075,309 | 40,727,044 | 88.39% | 34,358,188 | 74.57% | 34,340,828 | 74.53% | 57.77 | 85.81% | 76.02% |
| B89-16 | Blood | 37,064,434 | 32,786,731 | 88.46% | 27,068,507 | 73.03% | 27,057,814 | 73.00% | 45.30 | 92.79% | 77.80% |
|        | Tumor | 36,707,003 | 32,584,873 | 88.77% | 27,573,570 | 75.12% | 27,563,693 | 75.09% | 46.24 | 92.81% | 77.81% |
| B89-1  | Blood | 44,672,292 | 39,991,565 | 89.52% | 33,118,493 | 74.14% | 33,104,677 | 74.11% | 55.29 | 85.38% | 76.48% |
|        | Tumor | 47,984,607 | 42,981,923 | 89.57% | 37,367,938 | 77.87% | 37,342,283 | 77.82% | 64.01 | 85.86% | 76.91% |
| B89-3  | Blood | 44,269,288 | 39,825,062 | 89.96% | 34,704,291 | 78.39% | 34,680,718 | 78.34% | 59.85 | 85.94% | 76.74% |
|        | Tumor | 64,427,056 | 58,222,691 | 90.37% | 48,883,491 | 75.87% | 48,857,031 | 75.83% | 82.51 | 86.93% | 78.24% |
| B89-4  | Blood | 64,268,656 | 57,876,221 | 90.05% | 47,353,581 | 73.68% | 47,326,394 | 73.64% | 79.49 | 87.28% | 78.00% |
|        | Tumor | 43,563,415 | 38,924,441 | 89.35% | 33,928,370 | 77.88% | 33,904,517 | 77.83% | 58.16 | 85.80% | 76.27% |
| B89-5  | Blood | 45,711,335 | 41,238,505 | 90.22% | 32,903,604 | 71.98% | 32,892,719 | 71.96% | 55.25 | 85.87% | 75.30% |
|        | Tumor | 51,071,723 | 45,884,850 | 89.84% | 37,998,968 | 74.40% | 37,981,924 | 74.37% | 64.16 | 86.01% | 76.19% |
| B90    | Blood | 45,657,227 | 41,064,299 | 89.94% | 33,674,506 | 73.76% | 33,661,236 | 73.73% | 57.08 | 86.47% | 76.42% |
|        | Tumor | 68,786,711 | 61,951,694 | 90.06% | 50,911,504 | 74.01% | 50,884,458 | 73.97% | 86.35 | 88.27% | 78.50% |
| B92    | Blood | 61,870,998 | 55,787,117 | 90.17% | 45,377,176 | 73.34% | 45,357,565 | 73.31% | 76.07 | 87.03% | 77.51% |
|        | Tumor | 42,692,515 | 38,315,084 | 89.75% | 32,878,976 | 77.01% | 32,866,700 | 76.98% | 56.21 | 86.19% | 76.44% |
| B96    | Blood | 73,994,541 | 66,235,741 | 89.51% | 56,228,608 | 75.99% | 56,172,641 | 75.91% | 96.21 | 88.58% | 79.28% |
|        | Tumor | 46,850,444 | 41,905,812 | 89.45% | 36,847,966 | 78.65% | 36,813,122 | 78.58% | 63.49 | 86.32% | 77.03% |

|     |       |             |             |        |             |        |             |        |        |        |        |
|-----|-------|-------------|-------------|--------|-------------|--------|-------------|--------|--------|--------|--------|
| B98 | Blood | 51,499,739  | 46,345,229  | 89.99% | 39,159,321  | 76.04% | 39,127,581  | 75.98% | 66.88  | 86.60% | 77.54% |
|     | Tumor | 42,977,339  | 38,698,554  | 90.04% | 33,765,760  | 78.57% | 33,735,896  | 78.50% | 58.03  | 85.54% | 76.65% |
| B99 | Blood | 52,741,646  | 46,929,846  | 88.98% | 40,334,532  | 76.48% | 40,290,346  | 76.39% | 68.68  | 94.51% | 82.86% |
|     | Tumor | 140,501,992 | 125,737,468 | 89.49% | 102,783,026 | 73.15% | 102,642,730 | 73.05% | 172.77 | 97.28% | 89.18% |
| B9  | Blood | 246,700,460 | 178,393,337 | 72.31% | 94,725,338  | 38.40% | 93,902,419  | 38.06% | 123.71 | 89.05% | 72.82% |
|     | Tumor | 217,170,245 | 154,557,672 | 71.17% | 84,691,864  | 39.00% | 83,964,243  | 38.66% | 112.41 | 88.77% | 73.84% |

---

**Supplementary Table 3. Predicted somatic mutations in 99 TCC patients (shown in separate excel file).**

**Supplementary Table 4. A list of all confirmed somatic mutations detected in 99 TCC patients (shown in separate excel file).**



**Supplementary Table 5. Summary statistics of RNA-Seq data from tumor and normal bladder tissues in 42 TCC patients.**

| <b>Samples</b> | <b>Total Reads</b> | <b>No. of reads mapping to genome</b> | <b>No. of reads mapping to reference genes</b> | <b>No. of Genes covered by uniquely mapping Reads</b> |
|----------------|--------------------|---------------------------------------|------------------------------------------------|-------------------------------------------------------|
| B100-T         | 32,136,512         | 22,220,602                            | 18,684,233                                     | 16,558                                                |
| B101-T         | 45,162,546         | 33,272,540                            | 25,060,095                                     | 17,468                                                |
| B105-0-T       | 44,308,600         | 31,973,993                            | 22,528,568                                     | 16,985                                                |
| B105-1-T       | 53,148,122         | 39,777,976                            | 29,625,914                                     | 17,725                                                |
| B10-T          | 44,607,890         | 34,230,477                            | 18,223,162                                     | 16,800                                                |
| B13-T          | 45,870,072         | 34,722,324                            | 22,044,535                                     | 17,252                                                |
| B15-T          | 45,027,952         | 34,693,177                            | 19,052,404                                     | 16,601                                                |
| B18-T          | 38,866,690         | 28,160,397                            | 16,762,014                                     | 16,511                                                |
| B18-N          | 36,071,124         | 28,025,686                            | 21,547,863                                     | 16,958                                                |
| B22-T          | 39,173,750         | 28,355,183                            | 15,902,416                                     | 16,281                                                |
| B23-T          | 49,819,962         | 37,537,704                            | 25,592,850                                     | 17,707                                                |
| B23-N          | 52,055,046         | 39,674,423                            | 33,390,488                                     | 17,877                                                |
| B25-T          | 36,859,014         | 28,285,844                            | 16,148,275                                     | 17,323                                                |
| B25-N          | 36,951,784         | 28,599,732                            | 22,811,893                                     | 17,285                                                |
| B34-T          | 48,683,090         | 38,255,891                            | 19,501,567                                     | 17,257                                                |
| B34-N          | 42,467,474         | 32,279,423                            | 26,080,368                                     | 17,542                                                |
| B45-T          | 24,280,984         | 14,641,950                            | 8,243,636                                      | 14,283                                                |
| B45-N          | 39,399,802         | 30,403,868                            | 21,724,759                                     | 17,535                                                |
| B52-T          | 40,686,032         | 30,515,127                            | 19,854,983                                     | 17,130                                                |
| B52-N          | 44,922,862         | 34,692,147                            | 28,053,691                                     | 17,752                                                |
| B54-T          | 55,593,718         | 42,851,603                            | 28,770,438                                     | 17,412                                                |
| B54-N          | 29,634,316         | 22,538,776                            | 13,590,875                                     | 16,875                                                |
| B56-T          | 31,822,504         | 23,445,184                            | 13,526,029                                     | 16,101                                                |
| B56-N          | 35,011,204         | 23,671,526                            | 25,362,533                                     | 16,804                                                |
| B57-T          | 35,873,238         | 27,167,046                            | 12,008,138                                     | 16,466                                                |
| B57-N          | 48,422,722         | 34,667,553                            | 30,048,564                                     | 17,578                                                |
| B59-0-T        | 48,706,270         | 39,289,423                            | 17,379,940                                     | 17,030                                                |
| B59-1-T        | 44,833,384         | 34,411,903                            | 22,868,489                                     | 17,119                                                |
| B59-3-T        | 41,810,774         | 30,198,412                            | 26,705,415                                     | 17,836                                                |
| B59-3-N        | 55,341,118         | 40,030,997                            | 32,862,783                                     | 17,867                                                |
| B63-T          | 34,855,462         | 25,687,776                            | 11,649,829                                     | 16,509                                                |
| B63-N          | 33,664,610         | 24,760,675                            | 20,614,369                                     | 17,409                                                |
| B64-T          | 34,429,512         | 25,663,947                            | 10,672,005                                     | 15,886                                                |
| B64-N          | 45,389,434         | 35,628,279                            | 26,035,941                                     | 17,524                                                |
| B65-T          | 79,185,814         | 57,183,218                            | 25,863,508                                     | 17,028                                                |
| B66-0-T        | 31,366,570         | 19,999,152                            | 18,237,446                                     | 16,205                                                |
| B66-T          | 43,573,606         | 31,962,046                            | 22,243,113                                     | 17,185                                                |
| B68-T          | 43,147,208         | 30,350,355                            | 25,624,171                                     | 17,226                                                |
| B68-N          | 36,360,590         | 27,926,889                            | 20,170,644                                     | 17,127                                                |
| B70-T          | 39,003,752         | 27,425,412                            | 23,812,647                                     | 17,126                                                |
| B71-T          | 82,664,934         | 55,033,336                            | 44,716,785                                     | 17,782                                                |
| B71-N          | 38,770,298         | 28,254,367                            | 26,745,534                                     | 17,625                                                |
| B73-T          | 43,343,774         | 32,401,522                            | 22,277,634                                     | 17,226                                                |
| B73-N          | 37,603,818         | 29,667,934                            | 21,127,612                                     | 17,420                                                |
| B74-T          | 32,319,440         | 21,679,017                            | 18,182,326                                     | 17,147                                                |
| B77-T          | 43,852,166         | 32,569,154                            | 25,201,106                                     | 17,517                                                |
| B77-N          | 52,264,120         | 41,156,515                            | 23,187,302                                     | 16,927                                                |

|          |            |            |            |        |
|----------|------------|------------|------------|--------|
| B80-0-T  | 47,040,348 | 32,836,531 | 33,268,884 | 17,205 |
| B80-11-T | 33,583,952 | 24,405,375 | 21,325,969 | 16,783 |
| B80-13-T | 33,536,434 | 25,800,297 | 16,606,281 | 16,552 |
| B80-4-T  | 27,523,710 | 17,826,482 | 16,404,418 | 16,050 |
| B80-7-T  | 41,682,426 | 30,240,334 | 23,777,238 | 17,112 |
| B80-8-T  | 32,783,948 | 23,655,844 | 19,838,997 | 16,503 |
| B85-0-T  | 37,720,790 | 25,715,479 | 25,867,582 | 16,815 |
| B89-12-T | 44,327,176 | 33,269,524 | 23,308,964 | 17,622 |
| B89-4-T  | 41,874,076 | 29,036,204 | 26,338,999 | 16,632 |
| B89-5-T  | 34,398,578 | 26,252,246 | 13,372,857 | 16,496 |
| B9-T     | 43,480,020 | 30,518,379 | 25,788,398 | 17,527 |

---

**Supplementary Table 6. Genes in 99 TCCs that showed significantly higher mutation rates than the background.**

| Gene          | Non-silent somatic changes |                                |                      | Total mutations | N:S ratio | Number (%) of subjects harboring non-silent mutations | P-Value  |
|---------------|----------------------------|--------------------------------|----------------------|-----------------|-----------|-------------------------------------------------------|----------|
|               | Missense                   | Nonsense, splice site or indel | Synonymous mutations |                 |           |                                                       |          |
| <i>UTX</i>    | 5                          | 27                             | 2                    | 34              | 32:2      | 30                                                    | 0.00E+00 |
| <i>TP53</i>   | 15                         | 10                             | 0                    | 25              | -         | 24                                                    | 0.00E+00 |
| <i>ARID1A</i> | 4                          | 16                             | 0                    | 20              | -         | 15                                                    | 0.00E+00 |
| <i>CREBBP</i> | 4                          | 13                             | 1                    | 18              | 17:1      | 15                                                    | 0.00E+00 |
| <i>EP300</i>  | 7                          | 6                              | 0                    | 13              | -         | 13                                                    | 7.51E-14 |
| <i>HRAS</i>   | 13                         | 1                              | 0                    | 14              | -         | 13                                                    | 0.00E+00 |
| <i>RB1</i>    | 3                          | 10                             | 0                    | 13              | -         | 13                                                    | 0.00E+00 |
| <i>PIK3CA</i> | 14                         | 0                              | 1                    | 15              | 14:1      | 12                                                    | 0.00E+00 |
| <i>FGFR3</i>  | 12                         | 1                              | 1                    | 14              | 13:1      | 11                                                    | 0.00E+00 |
| <i>STAG2</i>  | 2                          | 9                              | 0                    | 11              | -         | 11                                                    | 3.83E-14 |
| <i>SYNE1</i>  | 7                          | 1                              | 2                    | 10              | 8:2       | 8                                                     | 1.54E-03 |
| <i>ERCC2</i>  | 6                          | 1                              | 0                    | 7               | -         | 7                                                     | 1.06E-09 |
| <i>KRAS</i>   | 8                          | 0                              | 1                    | 9               | 8:1       | 7                                                     | 1.89E-15 |
| <i>MLL</i>    | 5                          | 2                              | 1                    | 8               | 7:1       | 7                                                     | 5.28E-05 |
| <i>NF1</i>    | 5                          | 3                              | 0                    | 8               | -         | 7                                                     | 5.00E-07 |
| <i>SYNE2</i>  | 6                          | 1                              | 3                    | 10              | 7:3       | 7                                                     | 1.50E-03 |
| <i>ANK3</i>   | 5                          | 1                              | 0                    | 6               | -         | 6                                                     | 8.34E-04 |
| <i>CSMD3</i>  | 6                          | 0                              | 1                    | 7               | 6:1       | 6                                                     | 3.26E-04 |
| <i>ELF3</i>   | 2                          | 4                              | 0                    | 6               | -         | 6                                                     | 6.36E-10 |
| <i>ESPL1</i>  | 5                          | 1                              | 1                    | 7               | 6:1       | 6                                                     | 1.54E-05 |
| <i>LRP2</i>   | 5                          | 1                              | 0                    | 6               | -         | 6                                                     | 1.02E-03 |
| <i>ANK2</i>   | 5                          | 0                              | 0                    | 5               | -         | 5                                                     | 2.91E-03 |
| <i>ATM</i>    | 4                          | 1                              | 0                    | 5               | -         | 5                                                     | 8.28E-04 |
| <i>CHD6</i>   | 4                          | 1                              | 2                    | 7               | 5:2       | 5                                                     | 5.52E-04 |
| <i>ERBB2</i>  | 5                          | 0                              | 2                    | 7               | 5:2       | 5                                                     | 1.55E-05 |
| <i>ERBB3</i>  | 6                          | 0                              | 1                    | 7               | 6:1       | 5                                                     | 1.12E-06 |
| <i>FAT4</i>   | 5                          | 0                              | 0                    | 5               | -         | 5                                                     | 6.78E-03 |
| <i>KALRN</i>  | 5                          | 0                              | 1                    | 6               | 5:1       | 5                                                     | 9.17E-04 |
| <i>LAMA4</i>  | 5                          | 0                              | 1                    | 6               | 5:1       | 5                                                     | 9.84E-05 |
| <i>MLL3</i>   | 2                          | 3                              | 1                    | 6               | 5:1       | 5                                                     | 6.80E-03 |
| <i>NCOR1</i>  | 4                          | 2                              | 0                    | 6               | -         | 5                                                     | 2.78E-05 |
| <i>NFE2L3</i> | 5                          | 2                              | 1                    | 8               | 7:1       | 5                                                     | 2.61E-10 |
| <i>PDZD2</i>  | 4                          | 1                              | 1                    | 6               | 5:1       | 5                                                     | 6.88E-04 |
| <i>PIK3R4</i> | 5                          | 0                              | 0                    | 5               | -         | 5                                                     | 2.31E-05 |
| <i>TRAK1</i>  | 3                          | 2                              | 1                    | 6               | 5:1       | 5                                                     | 6.47E-06 |
| <i>TRRAP</i>  | 5                          | 1                              | 0                    | 6               | -         | 5                                                     | 3.69E-04 |
| <i>TSC1</i>   | 1                          | 4                              | 0                    | 5               | -         | 5                                                     | 9.82E-06 |

N:S, non-silent : silent mutation; -, no synonymous mutation was identified in this gene.

**Supplementary Table 7. *STAG2* mutations detected in discovery (99 tumors) and prevalence (50 tumors) cohorts.**

| Gene Symbol  | Tumor ID | Nucleotide (genomic)*           | Nucleotide (cDNA) <sup>§</sup> | Codon change | Amino acid change | Amino acid (protein) | Mutation Type     |
|--------------|----------|---------------------------------|--------------------------------|--------------|-------------------|----------------------|-------------------|
| <i>STAG2</i> | B105     | g.chrX:123048109C>T             | c.3085C>T                      | CAG=>TAG     | Gln=>Stop         | p.Q1029*             | nonsense          |
| <i>STAG2</i> | B109     | g.chrX:123037893T>C             | c.2564T>C                      | ATT=>ACT     | Ile=>Thr          | p.I855T              | missense          |
| <i>STAG2</i> | B114     | g.chrX:123027705G>A             | -                              | -            | -                 | -                    | spliceSite        |
| <i>STAG2</i> | B18      | g.chrX:123045061C>T             | c.3034C>T                      | CGA=>TGA     | Arg=>Stop         | p.R1012*             | nonsense          |
| <i>STAG2</i> | B35      | g.chrX:123012651G>A             | -                              | -            | -                 | -                    | spliceSite        |
| <i>STAG2</i> | B57      | g.chrX:122999075G>A             | c.306G>A                       | TGG=>TGA     | Trp=>Stop         | p.W102*              | nonsense          |
| <i>STAG2</i> | B80-3    | g.chrX:123024692C>T             | c.1777C>T                      | CAG=>TAG     | Gln=>Stop         | p.Q593*              | nonsense          |
| <i>STAG2</i> | B89-4    | g.chrX:123011737G>T             | c.914G>T                       | CGA=>CTA     | Arg=>Leu          | p.R305L              | missense          |
| <i>STAG2</i> | B110     | g.chrX:123030112_123030112delA  | c.2283_2283delA                | -            | -                 | L761fs               | Frame-shift_indel |
| <i>STAG2</i> | B87      | g.chrX:123006776insA            | c.544insA                      | -            | -                 | L182fs               | Frame-shift_indel |
| <i>STAG2</i> | B89-16   | g.chrX:123024495_123024496delTG | c.1701_1702delTG               | -            | -                 | F567fs               | Frame-shift_indel |
| <i>STAG2</i> | 267      | g.chrX:123006731C>T             | c.499C>T                       | CAG=>TAG     | Gln=>Stop         | p.Q167*              | nonsense          |
| <i>STAG2</i> | 267      | g.chrX:123006861C>G             | c.629C>G                       | TCA=>TGA     | Ser=>Stop         | p.S210*              | nonsense          |
| <i>STAG2</i> | 237      | g.chrX:123030188G>T             | -                              | -            | -                 | -                    | spliceSite        |
| <i>STAG2</i> | 71       | g.chrX:123052177C>T             | c.3349C>T                      | CAG=>TAG     | Gln=>Stop         | p.Q1117*             | nonsense          |
| <i>STAG2</i> | 137      | g.chrX:123037883insTCAT         | c.2554insTCAT                  | -            | -                 | A852fs               | Frame-shift_indel |

#Genomic positions are coordinates in the hg18 UCSC release of the human genome. g., genomic sequence; c., cDNA sequence; p., protein sequence. § Mutated positions indicate the sites in the protein-coding region of the cDNA sequence. \* Stop codon.

**Supplementary Table 8. Methylation status of *STAG2* promoter in 30 tumors and matched normal bladder tissue samples.**

| Sample ID | Number of CpGs successfully sequenced | Number of unmethylated CpGs | Number of methylated CpGs | Methylation rate of CpGs (%) | Methylation rate >10% (T or N) | Log2Ratio (T/N) >1 | P-value     |
|-----------|---------------------------------------|-----------------------------|---------------------------|------------------------------|--------------------------------|--------------------|-------------|
| B23T      | 43                                    | 43                          | 0                         | 0                            |                                |                    |             |
| B23N      | 430                                   | 429                         | 1                         | 0.23                         | No                             | -                  | -           |
| B34T      | 344                                   | 340                         | 4                         | 1.16                         |                                |                    |             |
| B34N      | 430                                   | 429                         | 1                         | 0.23                         | No                             | -                  | -           |
| B45T      | 430                                   | 420                         | 10                        | 2.33                         |                                |                    |             |
| B45N      | 430                                   | 426                         | 4                         | 0.93                         | No                             | -                  | -           |
| B52T      | 516                                   | 494                         | 22                        | 4.26                         |                                |                    |             |
| B52N      | 387                                   | 387                         | 0                         | 0                            | No                             | -                  | -           |
| B54T      | 258                                   | 252                         | 6                         | 2.33                         |                                |                    |             |
| B54N      | 301                                   | 301                         | 0                         | 0                            | No                             | -                  | -           |
| B63T      | 301                                   | 295                         | 6                         | 1.99                         |                                |                    |             |
| B63N      | 430                                   | 427                         | 3                         | 0.7                          | No                             | -                  | -           |
| B73T      | 430                                   | 421                         | 9                         | 2.09                         |                                |                    |             |
| B73N      | 430                                   | 424                         | 6                         | 1.39                         | No                             | -                  | -           |
| B77T      | 430                                   | 372                         | 58                        | 13.49                        |                                |                    |             |
| B77N      | 430                                   | 427                         | 3                         | 0.69                         | Yes                            | 1.291              | 2.75421E-13 |
| B83T      | 430                                   | 317                         | 113                       | 26.27                        |                                |                    |             |
| B83N      | 387                                   | 161                         | 226                       | 58.38                        | Yes                            | No                 | -           |
| B9T       | 430                                   | 427                         | 3                         | 0.7                          |                                |                    |             |
| B9N       | 430                                   | 365                         | 65                        | 15.12                        | No                             | -                  | -           |
| B16T      | 430                                   | 414                         | 16                        | 3.72                         |                                |                    |             |
| B16N      | 430                                   | 424                         | 6                         | 1.4                          | No                             | -                  | -           |
| B80T      | 430                                   | 419                         | 11                        | 2.56                         |                                |                    |             |
| B80N      | 430                                   | 417                         | 13                        | 3.03                         | No                             | -                  | -           |
| B64T      | 430                                   | 420                         | 10                        | 2.34                         |                                |                    |             |
| B64N      | 430                                   | 428                         | 2                         | 0.46                         | No                             | -                  | -           |
| B68T      | 430                                   | 419                         | 11                        | 2.57                         |                                |                    |             |
| B68N      | 344                                   | 343                         | 1                         | 0.29                         | No                             | -                  | -           |
| B71T      | 430                                   | 424                         | 6                         | 1.38                         |                                |                    |             |
| B71N      | 387                                   | 386                         | 1                         | 0.25                         | No                             | -                  | -           |
| B7T       | 387                                   | 297                         | 90                        | 23.25                        |                                |                    |             |
| B7N       | 430                                   | 427                         | 3                         | 0.69                         | Yes                            | 5.074              | 3.80013E-24 |
| B11T      | 430                                   | 280                         | 150                       | 34.77                        |                                |                    |             |
| B11N      | 430                                   | 423                         | 7                         | 1.62                         | Yes                            | 4.424              | 1.57977E-36 |
| B15T      | 430                                   | 406                         | 24                        | 5.59                         |                                |                    |             |
| B15N      | 430                                   | 424                         | 6                         | 1.38                         | No                             | -                  | -           |
| B21T      | 430                                   | 361                         | 69                        | 16.04                        |                                |                    |             |
| B21N      | 430                                   | 424                         | 6                         | 1.39                         | Yes                            | 3.529              | 2.65328E-14 |
| B25T      | 430                                   | 426                         | 4                         | 0.92                         |                                |                    |             |
| B25N      | 344                                   | 299                         | 45                        | 13.07                        | No                             | -                  | -           |
| B31T      | 430                                   | 424                         | 6                         | 1.4                          |                                |                    |             |
| B31N      | 387                                   | 385                         | 2                         | 0.51                         | No                             | -                  | -           |
| B85T      | 387                                   | 227                         | 160                       | 41.28                        |                                |                    |             |
| B85N      | 430                                   | 360                         | 70                        | 16.27                        | Yes                            | 1.343              | 1.80772E-15 |

|              |     |     |     |       |     |       |             |
|--------------|-----|-----|-----|-------|-----|-------|-------------|
| <b>B93T</b>  | 430 | 164 | 266 | 61.86 |     |       |             |
| <b>B93N</b>  | 387 | 225 | 162 | 41.86 | Yes | No    | -           |
| <b>B99T</b>  | 387 | 386 | 1   | 0.26  |     |       |             |
| <b>B99N</b>  | 430 | 408 | 22  | 5.21  | No  | -     | -           |
| <b>B103T</b> | 430 | 387 | 43  | 9.99  |     |       |             |
| <b>B103N</b> | 430 | 427 | 3   | 0.69  | No  | -     | -           |
| <b>B123T</b> | 301 | 213 | 88  | 29.23 |     |       |             |
| <b>B123N</b> | 387 | 363 | 24  | 6.2   | Yes | 2.237 | 4.71074E-16 |
| <b>B27T</b>  | 430 | 420 | 10  | 2.35  |     |       |             |
| <b>B27N</b>  | 387 | 353 | 34  | 8.79  | No  | -     | -           |
| <b>B29T</b>  | 387 | 99  | 288 | 74.4  |     |       |             |
| <b>B29N</b>  | 430 | 388 | 42  | 9.76  | Yes | 2.930 | 6.97232E-79 |
| <b>B37T</b>  | 301 | 117 | 184 | 61.13 |     |       |             |
| <b>B37N</b>  | 430 | 267 | 163 | 37.99 | Yes | No    | -           |
| <b>B49T</b>  | 430 | 425 | 5   | 1.17  |     |       |             |
| <b>B49N</b>  | 430 | 414 | 16  | 3.81  | No  | -     | -           |

---

## Supplementary Table 9. List of significant focal amplifications and deletions in the TCCs.

| Chromosome | Start of region | End of region | Amp/Del       | Score_Max | Score_Min | log2 of copy number ratio (Tumor/Normal) | P value    | FDR         | Gene count | Region_Class | Genes in region                                                                                                                                                                                      | Cancer genes in region |
|------------|-----------------|---------------|---------------|-----------|-----------|------------------------------------------|------------|-------------|------------|--------------|------------------------------------------------------------------------------------------------------------------------------------------------------------------------------------------------------|------------------------|
| chr1       | 200,001         | 600,000       | Amplification | 0.2727    | 0.2104    | 2.0481                                   | 0          | 0           | 3          | exonic       | OR4F18,OR4F29,OR4F3                                                                                                                                                                                  |                        |
| chr1       | 1,200,001       | 1,300,000     | Amplification | 0.1369    | 0.0761    | 1.5999                                   | 1.28E-05   | 0.00379928  | 9          | exonic       | ACAP3,AURKAIP1,CPSF3L,DVL1,GLTPD1,MXR48,PUSL1,SCNN1D,TAS1R3                                                                                                                                          |                        |
| chr1       | 2,200,001       | 2,500,000     | Amplification | 0.1421    | 0.0788    | 1.5991                                   | 7.10E-06   | 0.00212559  | 8          | exonic       | HES5,MORN1,PANK4,PEX10,PLCH2,RER1,SKI,TNFRSF14                                                                                                                                                       | TNFRSF14               |
| chr1       | 3,400,001       | 3,500,000     | Amplification | 0.1156    | 0.0821    | 1.5145                                   | 0.00014973 | 0.0267968   | 1          | exonic       | MEGF6                                                                                                                                                                                                |                        |
| chr1       | 121,100,001     | 141,500,000   | Deletion      | 0.1434    | 0.1194    | 0.6116                                   | 1.75E-06   | 7.32E-05    | 0          | intergenic   | EMBP1(dst=84752),LOC100130000(dst=978653)                                                                                                                                                            |                        |
| chr1       | 121,200,001     | 141,500,000   | Amplification | 0.1819    | 0.1819    | 3.2708                                   | 5.00E-08   | 4.37E-06    | 0          | intergenic   | EMBP1(dst=184792),LOC100130000(dst=978653)                                                                                                                                                           |                        |
| chr1       | 144,100,001     | 144,900,000   | Amplification | 0.1283    | 0.0828    | 1.4669                                   | 3.53E-05   | 0.0078532   | 19         | exonic       | ANKRD34A,ANKRD35,CD160,GPR88A,GPR88C,IFE2,ITGA10,LXN1,NBP11,NBP24,NUDT17,PDZK1,PEX11B,PIAS3,POLR3C,POLR3GL,RBM8A,RNF115,TKXNP                                                                        |                        |
| chr1       | 153,200,001     | 153,500,000   | Amplification | 0.1480    | 0.0758    | 1.4699                                   | 3.48E-06   | 0.000675328 | 23         | exonic       | ADAM15,CKS1B,CLK2,DCST1,DCST2,DPM3,EFNA1,EFNA3,EFNA,FAM189B,FLAD1,GBA,KRTCAP2,LENEP,MTX1,MUC1,PYGO2,SCAMP3,SHC1,SLC50A1,THBS3,TRIM46,ZBTB7B                                                          | MUC1                   |
| chr1       | 159,100,001     | 159,600,000   | Amplification | 0.1784    | 0.0884    | 1.4814                                   | 9.00E-08   | 3.05E-05    | 24         | exonic       | ADAMTS4,APOA3,ARHGAP30,B4GALT3,DEDD,F11R,FCER1G,ITLN1,ITLN2,KLHDC8,MZNDUF,S2,NT1,NR1B,PCP4L1,PFND2,PP2A,PRKRA,SDHC,TOMM40L,TSTD1,UFC1,UFC1,USP21                                                     | SDHC                   |
| chr2       | 9,800,001       | 9,900,000     | Amplification | 0.1033    | 0.0762    | 1.8055                                   | 0.00056964 | 0.00767945  | 0          | intergenic   | YWHAQ(dst=111444),TAF1B(dst=1022)                                                                                                                                                                    |                        |
| chr2       | 127,500,001     | 127,600,000   | Amplification | 0.0951    | 0.0951    | 1.6108                                   | 0.00134903 | 0.0190943   | 1          | exonic       | BN1                                                                                                                                                                                                  |                        |
| chr2       | 213,100,001     | 213,300,000   | Deletion      | 0.1035    | 0.0600    | 0.6139                                   | 0.00047728 | 0.0168163   | 1          | exonic       | ERBB4                                                                                                                                                                                                |                        |
| chr2       | 215,900,001     | 216,300,000   | Deletion      | 0.1003    | 0.0797    | 0.6504                                   | 0.00072431 | 0.0323261   | 2          | exonic       | ATIC,FN1                                                                                                                                                                                             | ATIC                   |
| chr2       | 223,900,001     | 224,700,000   | Deletion      | 0.1276    | 0.0799    | 0.6349                                   | 1.76E-05   | 0.0011334   | 5          | exonic       | AP1S3,MRPL44,SCG2,SERPINE2,WDFY1                                                                                                                                                                     |                        |
| chr2       | 233,100,001     | 234,000,000   | Deletion      | 0.1334    | 0.0608    | 0.6433                                   | 7.45E-06   | 0.00018525  | 14         | exonic       | ATG16L1,C2orf82,CHRN2,CHRN3,DGKD,EFH1,EIF4E,ZGDF2,INPP5D,KCNJ13,NEUZINSEF,SAG,TRG1                                                                                                                   |                        |
| chr2       | 239,600,001     | 239,800,000   | Deletion      | 0.1064    | 0.0633    | 0.6551                                   | 0.00032108 | 0.0101678   | 1          | exonic       | HDAC4                                                                                                                                                                                                |                        |
| chr2       | 242,300,001     | 242,400,000   | Deletion      | 0.1020    | 0.0793    | 0.6574                                   | 0.00057992 | 0.0232881   | 3          | exonic       | D2HGDH,GAL3ST2,ING5                                                                                                                                                                                  |                        |
| chr3       | 12,800,001      | 13,700,000    | Amplification | 0.1422    | 0.0768    | 1.6868                                   | 7.08E-06   | 0.00263966  | 6          | exonic       | CAND2,FBLN2,HDAC11,JOSEC1,NUP210,PL32                                                                                                                                                                |                        |
| chr3       | 16,400,001      | 16,500,000    | Amplification | 0.0870    | 0.0755    | 1.5849                                   | 0.00307768 | 0.0386816   | 1          | exonic       | RFTN1                                                                                                                                                                                                |                        |
| chr3       | 49,800,001      | 50,600,000    | Deletion      | 0.1116    | 0.0968    | 0.6438                                   | 0.00016076 | 0.00207253  | 29         | exonic       | C3orf18,C3orf45,C3orf54,CACNA2D2,CAMKV,CDHR4,CYB5B,DD2,GNAI2,GNAT1,HEMK1,JHYAL1,JHYAL2,JHYAL3,FRD2,KNON1A,MS11,R,NAT6,NPRL2,RASSF1,RBM5,RBM6,SEM A3B,SEMA3F,SLC38A3,TMEM115,TRAIP,TUSC2,UBA7,ZMYND10 |                        |
| chr3       | 52,800,001      | 52,900,000    | Deletion      | 0.1045    | 0.0885    | 0.6276                                   | 0.0004136  | 0.00801666  | 6          | exonic       | ITIH1,ITIH3,ITIH4,MUSTN1,TMEM110,TMEM110-MUSTN1                                                                                                                                                      |                        |
| chr3       | 57,900,001      | 58,000,000    | Deletion      | 0.0913    | 0.0913    | 0.6329                                   | 0.00228393 | 0.0445719   | 1          | exonic       | FLNB                                                                                                                                                                                                 |                        |
| chr4       | 1,700,001       | 1,800,000     | Amplification | 0.1412    | 0.0780    | 1.5853                                   | 7.81E-06   | 0.000285204 | 3          | exonic       | FGFR3,LETM1,TACC3                                                                                                                                                                                    | FGFR3                  |
| chr4       | 2,500,001       | 2,600,000     | Deletion      | 0.0926    | 0.0926    | 0.6500                                   | 0.00193823 | 0.0394009   | 1          | splicing     | FAM193A                                                                                                                                                                                              |                        |
| chr4       | 181,900,001     | 182,400,000   | Deletion      | 0.1082    | 0.0795    | 0.6154                                   | 0.00025539 | 0.00299402  | 1          | ncRNA        | NCRNA00290                                                                                                                                                                                           |                        |
| chr4       | 190,300,001     | 190,600,000   | Deletion      | 0.1019    | 0.0794    | 0.6329                                   | 0.00058222 | 0.0105348   | 0          | intergenic   | LOC401164(dst=539945),HSP90AA4P(dst=31293)                                                                                                                                                           |                        |
| chr5       | 1,100,001       | 1,200,000     | Amplification | 0.1797    | 0.0931    | 1.7196                                   | 7.00E-08   | 4.88E-06    | 1          | exonic       | SLC12A7                                                                                                                                                                                              |                        |
| chr5       | 6,800,001       | 8,200,000     | Amplification | 0.1133    | 0.0778    | 1.8127                                   | 0.00019175 | 0.0169024   | 5          | exonic       | ADCY2,C5orf49,FASTKD3,MTRR,PAPD7                                                                                                                                                                     |                        |
| chr5       | 10,600,001      | 11,200,000    | Amplification | 0.1174    | 0.0851    | 1.7526                                   | 0.00012201 | 0.0105227   | 3          | exonic       | ANKRD33B,CTNND2,DAP                                                                                                                                                                                  |                        |
| chr5       | 14,100,001      | 14,500,000    | Amplification | 0.1208    | 0.0780    | 1.8624                                   | 8.40E-05   | 0.00598915  | 1          | exonic       | TRIO                                                                                                                                                                                                 |                        |
| chr5       | 21,200,001      | 21,400,000    | Amplification | 0.1254    | 0.0799    | 1.7086                                   | 4.93E-05   | 0.00233611  | 0          | intergenic   | CDH18(dst=1175891),GUSBP1(dst=95346)                                                                                                                                                                 |                        |
| chr5       | 36,800,001      | 37,300,000    | Amplification | 0.1548    | 0.0778    | 1.6858                                   | 1.45E-06   | 8.03E-05    | 2          | exonic       | C5orf42,NPBL                                                                                                                                                                                         |                        |
| chr5       | 53,700,001      | 54,000,000    | Deletion      | 0.1102    | 0.0810    | 0.6093                                   | 0.00019487 | 0.00457547  | 2          | exonic       | HSPB3,SNX18                                                                                                                                                                                          |                        |

|      |             |             |               |        |        |        |            |             |    |            |                                                                                                                                                                                                                                                                                           |               |
|------|-------------|-------------|---------------|--------|--------|--------|------------|-------------|----|------------|-------------------------------------------------------------------------------------------------------------------------------------------------------------------------------------------------------------------------------------------------------------------------------------------|---------------|
| chr5 | 88,900,001  | 70,700,000  | Deletion      | 0.1665 | 0.0837 | 0.5919 | 6.00E-08   | 7.04E-06    | 8  | exonic     | GTF2H2,GTF2H2C,GTF2H2D,NAIP,SERF1A,SERF1B,SMN1,SMN2                                                                                                                                                                                                                                       |               |
| chr5 | 79,400,001  | 79,900,000  | Deletion      | 0.1044 | 0.0858 | 0.6140 | 0.00042397 | 0.0124565   | 6  | exonic     | ANKRD348,FAM151B,SERNCS,SPZ1,THBS4,ZFYVE19                                                                                                                                                                                                                                                |               |
| chr5 | 82,600,001  | 82,700,000  | Deletion      | 0.0997 | 0.0793 | 0.6229 | 0.00077572 | 0.0244819   | 1  | exonic     | XRCC4                                                                                                                                                                                                                                                                                     |               |
| chr5 | 97,300,001  | 97,800,000  | Deletion      | 0.0961 | 0.0817 | 0.6144 | 0.00123558 | 0.0417587   | 0  | intergenic | RICK2(dst=755240),RGM1B(dst=332899)                                                                                                                                                                                                                                                       |               |
| chr6 | 20,500,001  | 21,300,000  | Amplification | 0.2078 | 0.1061 | 2.1267 | 0          | 0           | 2  | exonic     | CDKAL1,EF3                                                                                                                                                                                                                                                                                |               |
| chr6 | 58,900,001  | 61,900,000  | Amplification | 0.2288 | 0.2288 | 2.4036 | 0          | 0           | 0  | intergenic | GUSBP4(dst=504318),MTRNR2L9(dst=441967)                                                                                                                                                                                                                                                   |               |
| chr6 | 58,900,001  | 61,900,000  | Deletion      | 0.3003 | 0.3003 | 0.4972 | 0          | 0           | 0  | intergenic | GUSBP4(dst=504318),MTRNR2L9(dst=441967)                                                                                                                                                                                                                                                   |               |
| chr7 | 1,400,001   | 1,500,000   | Deletion      | 0.0872 | 0.0872 | 0.5967 | 0.00379159 | 0.0467039   | 2  | exonic     | INTS1,MICAL2                                                                                                                                                                                                                                                                              |               |
| chr7 | 1,400,001   | 1,500,000   | Amplification | 0.1443 | 0.0836 | 1.5574 | 5.66E-06   | 0.000219346 | 2  | exonic     | INTS1,MICAL2                                                                                                                                                                                                                                                                              |               |
| chr7 | 2,500,001   | 2,700,000   | Amplification | 0.1165 | 0.1088 | 1.6893 | 0.00013506 | 0.00350529  | 4  | exonic     | BRAT1,JQCE,LFNG,TTYH3                                                                                                                                                                                                                                                                     |               |
| chr7 | 61,100,001  | 61,200,000  | Deletion      | 0.1216 | 0.1216 | 0.5897 | 4.05E-05   | 0.000697298 | 0  | intergenic | NONE(dst=NONE),LOC643955(dst=1189105)                                                                                                                                                                                                                                                     |               |
| chr7 | 101,900,001 | 102,100,000 | Amplification | 0.0932 | 0.0923 | 1.5645 | 0.00164798 | 0.0469199   | 8  | exonic     | LRWD1,POLR2J,POLR2J2,POLR2J3,RASA4,SPDYE2,SPDYE2L,LPK3BL                                                                                                                                                                                                                                  |               |
| chr7 | 149,100,001 | 149,200,000 | Amplification | 0.0987 | 0.0987 | 1.5350 | 0.00093549 | 0.0211011   | 2  | exonic     | SSPO,ZNF862                                                                                                                                                                                                                                                                               |               |
| chr8 | 6,600,001   | 8,100,000   | Deletion      | 0.2064 | 0.1068 | 0.6017 | 0          | 0           | 35 | exonic     | AGPAT5,DEFA1,DEFA1B,DEFA3,DEFA4,DEFA5,DEFA6,DEFB1,DEFB10A,DEFB103B,DEFB104A,DEFB104B,DEFB105A,DEFB105B,DEFB106A,DEFB106B,DEFB107A,DEFB107B,DEFB10A,DEFB10B,FAM90A10,FAM90A13,FAM90A14,FAM90A18,FAM90A19,FAM90A20,FAM90A5,FAM90A7,FAM90A8,FAM90A9,LOC100132596,SPAG11A,SPAG11B,XKRF2,NF70G |               |
| chr8 | 27,800,001  | 28,400,000  | Deletion      | 0.1411 | 0.0828 | 0.6185 | 2.45E-06   | 0.00144424  | 6  | exonic     | C8orf80,ELP3,FBXO16,PNOC,SCARA5,ZNF395                                                                                                                                                                                                                                                    |               |
| chr8 | 30,100,001  | 31,000,000  | Deletion      | 0.1287 | 0.0806 | 0.6310 | 1.51E-05   | 0.00228325  | 11 | exonic     | DCTM6,GSR,GTF2E2,LEPROTL1,LOC100507341,MBOAT4,PPP2C8,PUR3,RBM5,TEX15,UBXN8                                                                                                                                                                                                                |               |
| chr8 | 34,400,001  | 34,900,000  | Deletion      | 0.1120 | 0.0811 | 0.6056 | 0.00015212 | 0.00877978  | 0  | intergenic | DUSP26(dst=823020),LINCSD(dst=312517)                                                                                                                                                                                                                                                     |               |
| chr8 | 44,000,001  | 47,000,000  | Amplification | 0.2637 | 0.1364 | 1.6547 | 0          | 0           | 0  | intergenic | POTEA(dst=662516),NCRNA00293(dst=671673)                                                                                                                                                                                                                                                  |               |
| chr8 | 44,000,001  | 47,000,000  | Deletion      | 0.1893 | 0.1893 | 0.5225 | 0          | 0           | 0  | intergenic | POTEA(dst=662516),NCRNA00293(dst=671673)                                                                                                                                                                                                                                                  |               |
| chr8 | 81,700,001  | 83,300,000  | Amplification | 0.1542 | 0.0829 | 1.5157 | 1.59E-06   | 0.0256112   | 12 | exonic     | CHMP4C,FABP12,FABP4,FABP5,FABP9,IMPA1,PAG1,PMP2,SLC10A5,SNX18,ZFAND1,ZNF704                                                                                                                                                                                                               |               |
| chr8 | 98,900,001  | 103,600,000 | Amplification | 0.2126 | 0.1065 | 1.5269 | 0          | 0           | 26 | exonic     | ANKRD46,C8orf47,COX8C,FBXO43,GRHL2,HRSP12,KCNJ2,LAPTMB,MATN2,NCALD,NPAL2,OSR2,PABPC1,POLR2K,POP1,REGZ2,RNF184,RPL30,RRM2B,SNX31,SPAG15,TK3,UBR5,VPS13B,YWHAZ,ZNF706                                                                                                                       | COX8C         |
| chr8 | 105,300,001 | 108,500,000 | Amplification | 0.2005 | 0.1015 | 1.5459 | 0          | 0           | 8  | exonic     | ABRAJANGPT1,DPYS,LRP12,OXR1,RMS2,TM7SF4,ZFP942                                                                                                                                                                                                                                            |               |
| chr8 | 118,500,001 | 120,900,000 | Amplification | 0.1580 | 0.0852 | 1.4714 | 9.30E-07   | 0.00881568  | 9  | exonic     | COLEC10,EMPP2,EXT1,MAL2,MED30,NOV,SMAD12,TRAC,TFRSP11B                                                                                                                                                                                                                                    | EXT1          |
| chr8 | 126,400,001 | 127,000,000 | Amplification | 0.1724 | 0.0911 | 1.5249 | 1.20E-07   | 0.00138312  | 2  | exonic     | NSMCE2,TRIB1                                                                                                                                                                                                                                                                              |               |
| chr8 | 128,100,001 | 130,600,000 | Amplification | 0.1841 | 0.1016 | 1.5265 | 5.00E-08   | 0.00031048  | 2  | exonic     | MYC,POU5F1B                                                                                                                                                                                                                                                                               | MYC           |
| chr8 | 133,600,001 | 134,600,000 | Amplification | 0.1805 | 0.0972 | 1.4987 | 7.00E-08   | 0.00069549  | 8  | exonic     | LRRCS,NDRG1,PHF20L1,SLA,ST3GAL1,TG,TIMEF71,WRSP1                                                                                                                                                                                                                                          | NDRG1         |
| chr8 | 144,400,001 | 144,800,000 | Amplification | 0.2259 | 0.1132 | 1.5401 | 0          | 0           | 14 | exonic     | C8orf73,EEF1D,GLI4,GSDMD,MAFANAPRT1,PHYCR1,RHPN1,TRIGDS,TOP1MT,TSTA3,ZC3H3,ZFP411,ZNF696                                                                                                                                                                                                  |               |
| chr9 | 9,200,001   | 9,900,000   | Deletion      | 0.1697 | 0.0973 | 0.6111 | 5.00E-08   | 0.000625467 | 1  | splicing   | PTRRD                                                                                                                                                                                                                                                                                     |               |
| chr9 | 21,700,001  | 22,700,000  | Deletion      | 0.6461 | 0.3343 | 0.3271 | 0          | 0           | 4  | exonic     | CDKN2A,CDKN2B,DMRT1,MTAP                                                                                                                                                                                                                                                                  | CDKN2A,CDKN2B |
| chr9 | 23,300,001  | 25,600,000  | Deletion      | 0.2259 | 0.1130 | 0.5563 | 0          | 0           | 1  | exonic     | ELAVL2                                                                                                                                                                                                                                                                                    |               |
| chr9 | 36,500,001  | 36,600,000  | Deletion      | 0.1384 | 0.0834 | 0.6391 | 3.48E-06   | 0.0218682   | 1  | exonic     | MELK                                                                                                                                                                                                                                                                                      |               |
| chr9 | 40,900,001  | 41,100,000  | Deletion      | 0.1905 | 0.0961 | 0.5570 | 0          | 0           | 0  | intergenic | ZNF558(dst=117889),FAM75A5(dst=211107)                                                                                                                                                                                                                                                    |               |
| chr9 | 44,900,001  | 45,200,000  | Deletion      | 0.1369 | 0.0810 | 0.5865 | 4.41E-06   | 0.0402509   | 1  | ncRNA      | FAM27C                                                                                                                                                                                                                                                                                    |               |
| chr9 | 45,700,001  | 45,800,000  | Deletion      | 0.1441 | 0.0901 | 0.5704 | 1.61E-06   | 0.0131911   | 0  | intergenic | FAM27A(dst=81722),KGF1P1(dst=823421)                                                                                                                                                                                                                                                      |               |
| chr9 | 67,300,001  | 67,400,000  | Deletion      | 0.1546 | 0.0801 | 0.6263 | 3.50E-07   | 0.00803985  | 1  | ncRNA      | FAM27B                                                                                                                                                                                                                                                                                    |               |
| chr9 | 68,200,001  | 68,300,000  | Deletion      | 0.1434 | 0.0800 | 0.6414 | 1.74E-06   | 0.0146344   | 0  | intergenic | LOC100132552(dst=61809),PGM5P2(dst=70064)                                                                                                                                                                                                                                                 |               |
| chr9 | 69,300,001  | 69,400,000  | Deletion      | 0.1351 | 0.0852 | 0.6435 | 5.71E-06   | 0.0432052   | 0  | intergenic | LOC100133920(dst=345232),FOXDL5(dst=65527)                                                                                                                                                                                                                                                |               |
| chr9 | 118,200,001 | 118,500,000 | Deletion      | 0.1646 | 0.0827 | 0.6157 | 8.00E-08   | 0.00093188  | 2  | exonic     | ASTN2,TRIM32                                                                                                                                                                                                                                                                              |               |
| chr9 | 123,100,001 | 123,600,000 | Deletion      | 0.1407 | 0.0803 | 0.6138 | 2.58E-06   | 0.0164342   | 4  | exonic     | DAB2IP,GSN,STOM,TLL11                                                                                                                                                                                                                                                                     |               |
| chr9 | 126,900,001 | 127,200,000 | Deletion      | 0.1610 | 0.0907 | 0.6080 | 1.70E-07   | 0.00391017  | 5  | exonic     | GAPVD1,HSPA5,PPP6C,RABEPK,SCAI                                                                                                                                                                                                                                                            |               |
| chr9 | 131,800,001 | 131,900,000 | Deletion      | 0.1351 | 0.0829 | 0.6109 | 5.75E-06   | 0.0445611   | 2  | exonic     | FNBP1,GPR107                                                                                                                                                                                                                                                                              | FNBP1         |
| chr9 | 132,700,001 | 133,000,000 | Deletion      | 0.1372 | 0.0877 | 0.6135 | 4.22E-06   | 0.0262327   | 6  | exonic     | ABL1,AIF1L,FBICD1,LAMC3,NUP214,GRFP                                                                                                                                                                                                                                                       | ABL1,NUP214   |
| chr9 | 136,400,001 | 136,500,000 | Amplification | 0.0969 | 0.0969 | 1.6255 | 0.0012129  | 0.0162981   | 1  | exonic     | RXRA                                                                                                                                                                                                                                                                                      |               |
| chr9 | 138,300,001 | 138,600,000 | Deletion      | 0.1752 | 0.0945 | 0.6063 | 2.00E-08   | 0.00023677  | 10 | exonic     | C9orf63,CARD9,DNL2,GPSM1,INPPE,NOTCH1,PMPCA,SODCAG3,SEC18A,SNAPC4                                                                                                                                                                                                                         | NOTCH1        |



|       |             |             |               |        |        |        |            |             |    |            |                                                                                                                                                    |        |
|-------|-------------|-------------|---------------|--------|--------|--------|------------|-------------|----|------------|----------------------------------------------------------------------------------------------------------------------------------------------------|--------|
| chr9  | 138,300,001 | 138,600,000 | Amplification | 0.1007 | 0.0886 | 1.6376 | 0.00075507 | 0.00973439  | 10 | exonic     | C9orf163,CARD9,DNLZ,GPSM1,INPPE,NOTCH1,PMPCA,SODCA3,SEC18A,SNAPC4                                                                                  | NOTCH1 |
| chr10 | 5,500,001   | 5,700,000   | Amplification | 0.1138 | 0.0772 | 1.5360 | 0.00018228 | 0.00320709  | 2  | exonic     | CALML3,CALML5                                                                                                                                      |        |
| chr10 | 11,900,001  | 12,100,000  | Amplification | 0.0903 | 0.0753 | 1.6276 | 0.00222382 | 0.0290549   | 2  | exonic     | C10orf47,LFPF2                                                                                                                                     |        |
| chr10 | 38,800,001  | 38,900,000  | Deletion      | 0.1099 | 0.1099 | 0.6563 | 0.00020278 | 0.0284399   | 0  | intergenic | LOC399744(dist=18914),NONE(dist=NONE)                                                                                                              |        |
| chr10 | 39,200,001  | 41,700,000  | Deletion      | 0.1390 | 0.1390 | 0.6047 | 3.26E-06   | 0.000104345 | 0  | intergenic | LOC399744(dist=18914),LOC441666(dist=447320)                                                                                                       |        |
| chr10 | 104,900,001 | 105,100,000 | Deletion      | 0.1068 | 0.0601 | 0.6383 | 0.00030316 | 0.0402019   | 4  | exonic     | INAL,LOC729020,NTSC2,PCGF6                                                                                                                         |        |
| chr10 | 109,900,001 | 110,100,000 | Deletion      | 0.1052 | 0.0609 | 0.6261 | 0.00037959 | 0.0485748   | 0  | intergenic | SORCS1(dist=85545),XPNPEP1(dist=1514514)                                                                                                           |        |
| chr10 | 118,400,001 | 118,600,000 | Deletion      | 0.1058 | 0.0819 | 0.6331 | 0.00034822 | 0.044568    | 3  | exonic     | C10orf82,END4,HSPA12A                                                                                                                              |        |
| chr10 | 121,000,001 | 121,200,000 | Deletion      | 0.1125 | 0.0603 | 0.6490 | 0.0001426  | 0.00682089  | 1  | exonic     | GRK5                                                                                                                                               |        |
| chr10 | 126,300,001 | 126,400,000 | Deletion      | 0.1100 | 0.0601 | 0.6453 | 0.00019988 | 0.0125515   | 1  | exonic     | FAM53B                                                                                                                                             |        |
| chr10 | 129,700,001 | 129,800,000 | Deletion      | 0.1119 | 0.0605 | 0.6517 | 0.0001538  | 0.00882     | 2  | exonic     | MK67,PTPRE                                                                                                                                         |        |
| chr10 | 132,400,001 | 132,500,000 | Deletion      | 0.1348 | 0.0810 | 0.6345 | 5.93E-06   | 0.00067074  | 0  | intergenic | GLRX3(dist=531365),MIR378C(dist=150841)                                                                                                            |        |
| chr10 | 134,700,001 | 135,000,000 | Deletion      | 0.1332 | 0.0883 | 0.6271 | 7.75E-06   | 0.0015497   | 8  | exonic     | ADAM8,CALY,GPR123,KND1,TUBGCP2,UTL1,VENTX,ZNF511                                                                                                   |        |
| chr11 | 1,800,001   | 2,000,000   | Deletion      | 0.1734 | 0.0684 | 0.6453 | 2.00E-08   | 3.08E-06    | 5  | exonic     | LSP1,MRPL23,SYT8,TNN2,TNNT3                                                                                                                        |        |
| chr11 | 28,700,001  | 30,200,000  | Deletion      | 0.1543 | 0.0604 | 0.6390 | 3.80E-07   | 0.000113409 | 1  | exonic     | KCNA4                                                                                                                                              |        |
| chr11 | 42,700,001  | 43,000,000  | Deletion      | 0.1270 | 0.0798 | 0.6415 | 1.94E-05   | 0.00229161  | 0  | intergenic | LOC100507205(dist=468185),HNRNPKP9(dist=29630)                                                                                                     |        |
| chr11 | 48,700,001  | 48,800,000  | Deletion      | 0.1073 | 0.0837 | 0.6228 | 0.0002873  | 0.0137866   | 0  | intergenic | OR4A47(dist=232151),LOC120824(dist=153626)                                                                                                         |        |
| chr11 | 50,600,001  | 50,900,000  | Deletion      | 0.1019 | 0.0796 | 0.6394 | 0.00058175 | 0.0272734   | 0  | intergenic | LOC54813(dist=263623),ORAA5(dist=367954)                                                                                                           |        |
| chr11 | 51,500,001  | 54,500,000  | Deletion      | 0.1213 | 0.1213 | 0.6101 | 4.20E-05   | 0.00325385  | 0  | intergenic | OR4C46(dist=127214),TRIM48(dist=286234)                                                                                                            |        |
| chr11 | 65,100,001  | 65,200,000  | Amplification | 0.1076 | 0.1076 | 1.6499 | 0.00036224 | 0.0310422   | 6  | exonic     | EHP1,1,KCNK7,MAP3K11,PCNX3,RELA,SPA1                                                                                                               |        |
| chr11 | 66,900,001  | 67,000,000  | Amplification | 0.1137 | 0.1137 | 1.6976 | 0.00018366 | 0.0136201   | 10 | exonic     | CABP4,CARNS1,CCRO1B,GPR152,PPP1C,A,PTPRAP,RAD9A,RPS8K2,TBC1D10C,TMEM134                                                                            |        |
| chr11 | 67,500,001  | 67,800,000  | Amplification | 0.1294 | 0.0924 | 1.6589 | 3.12E-05   | 0.00302829  | 5  | exonic     | ALDH3B1,CHKA,NDUF8,TCIRG1,UNC93B1                                                                                                                  |        |
| chr11 | 68,300,001  | 68,600,000  | Amplification | 0.1472 | 0.1124 | 2.1124 | 3.95E-06   | 0.000188008 | 6  | exonic     | CPT1A,IGHMBP2,MIRGPRD,MIRGPRF,MRPL21,TPCN2                                                                                                         |        |
| chr11 | 68800001    | 69800000    | Amplification | 0.2902 | 0.1577 | 2.4104 | 0          | 0           | 9  | exonic     | ANO1,CCND1,FADD,FGF19,FGF3,FGF4,MYO6,ORAOV1,PPFIA1                                                                                                 | CCND1  |
| chr11 | 70,100,001  | 70,200,000  | Amplification | 0.1110 | 0.0755 | 1.9096 | 0.00024912 | 0.0193804   | 1  | exonic     | SHANK2                                                                                                                                             |        |
| chr11 | 76,500,001  | 76,600,000  | Amplification | 0.1335 | 0.0797 | 1.5652 | 1.93E-05   | 0.00119029  | 2  | exonic     | CAPNS1,MYO7A                                                                                                                                       |        |
| chr12 | 67500001    | 68200000    | Amplification | 0.1195 | 0.0766 | 4.6954 | 9.72E-05   | 0.00202412  | 5  | exonic     | CPM,CPSF6,LYZ,MDM2,YEATS4                                                                                                                          | MDM2   |
| chr12 | 123,400,001 | 123,500,000 | Amplification | 0.0921 | 0.0921 | 1.5863 | 0.00183306 | 0.035737    | 1  | exonic     | NCOR2                                                                                                                                              |        |
| chr12 | 131,600,001 | 131,700,000 | Amplification | 0.1111 | 0.0860 | 1.5232 | 0.00024714 | 0.00484512  | 2  | exonic     | FBRSL1,LOC100507055                                                                                                                                |        |
| chr13 | 45,300,001  | 45,400,000  | Deletion      | 0.0905 | 0.0827 | 0.5803 | 0.00249731 | 0.0335471   | 1  | exonic     | SLAH3                                                                                                                                              |        |
| chr13 | 47300001    | 50600000    | Deletion      | 0.1271 | 0.0600 | 0.5089 | 1.93E-05   | 0.000394704 | 23 | exonic     | ARL11,CAB39L,CDADC1,CYSLTR2,DLU7,EBPL,FNDC3A,ITM2B,KCNRG,KPN3,LPAR6,MDM4,MLNR,NUDT15,PHF11,RB1,RC3TB1,RC3TB2,RSASEB2B,SETDB2,SPRYD7,5,UCL2L,TRIM13 | RB1    |
| chr13 | 112,700,001 | 113,100,000 | Amplification | 0.1021 | 0.0997 | 1.6579 | 0.0006538  | 0.00883379  | 8  | exonic     | DLU4,F10,F7,GRTP1,LAMP1,MCF2L,PCID2,PRO2                                                                                                           |        |
| chr13 | 113,700,001 | 113,900,000 | Amplification | 0.0936 | 0.0933 | 1.6982 | 0.00157974 | 0.0217515   | 1  | exonic     | RASA3                                                                                                                                              |        |
| chr14 | 104,200,001 | 104,300,000 | Amplification | 0.1208 | 0.1208 | 1.7545 | 8.39E-05   | 0.00183107  | 3  | exonic     | ADSSL1,INF2,SIVA1                                                                                                                                  |        |
| chr14 | 104,700,001 | 104,800,000 | Amplification | 0.1092 | 0.1092 | 1.8090 | 0.00030514 | 0.00570223  | 4  | exonic     | BRF1,BTBD6,JAG2,NUDT14                                                                                                                             |        |
| chr15 | 39,900,001  | 40,000,000  | Deletion      | 0.0959 | 0.0959 | 0.6399 | 0.00128835 | 0.0107853   | 6  | exonic     | EHD4,JMJD7,JMJD7-PLA2G4B,MAPKB1,PLA2G4B,SPTBN5                                                                                                     |        |
| chr15 | 39,900,001  | 40,000,000  | Amplification | 0.0824 | 0.0824 | 1.6289 | 0.00490254 | 0.0465958   | 6  | exonic     | EHD4,JMJD7,JMJD7-PLA2G4B,MAPKB1,PLA2G4B,SPTBN5                                                                                                     |        |
| chr16 | 500,001     | 700,000     | Deletion      | 0.1321 | 0.1198 | 0.5678 | 8.89E-06   | 0.000217389 | 16 | exonic     | C16orf11,C16orf13,FAM195A,FBXL16,JMJD8,NHR,RC4,PIGQ,RAB11FIP3,RAB40C,RHB DL1,RHOT2,SOLH,STUB1,WDR34,WDR90,WFIKKN1                                  |        |
| chr16 | 1,000,001   | 1,200,000   | Amplification | 0.1393 | 0.0753 | 1.6278 | 9.72E-06   | 0.000343625 | 3  | exonic     | C10TNF8,CACNA1H,SSR5                                                                                                                               |        |
| chr16 | 1,100,001   | 1,300,000   | Deletion      | 0.1139 | 0.0845 | 0.5970 | 0.00011726 | 0.00318546  | 5  | exonic     | CACNA1H,TPSAB1,TPSB2,TPSD1,TPSG1                                                                                                                   |        |
| chr16 | 3,500,001   | 3,900,000   | Deletion      | 0.1068 | 0.0890 | 0.5499 | 0.00030581 | 0.0143671   | 6  | exonic     | CLUAP1,CREBBP,DNAE1,NLRC3,SLX4,TRAF1                                                                                                               | CREBBP |
| chr16 | 4,700,001   | 4,800,000   | Deletion      | 0.1003 | 0.0815 | 0.6376 | 0.00071731 | 0.0321988   | 6  | exonic     | ANKS3,C16orf71,GLYR1,ROGDI,SEPT12,ZNF500                                                                                                           |        |
| chr16 | 16,300,001  | 16,400,000  | Deletion      | 0.1098 | 0.1098 | 0.5218 | 0.00020418 | 0.00733001  | 7  | ncRNA      | MIR3175-1,MIR3179-2,MIR3179-3,MIR3180-1,MIR3180-2,MIR3180-3,PKNOX1P1                                                                               |        |
| chr16 | 28,200,001  | 28,500,000  | Amplification | 0.1294 | 0.0788 | 1.7154 | 3.11E-05   | 0.00189391  | 7  | exonic     | APC8R,CCDC101,CLN3,EIP3CLIL27,NUPR1,SRK1                                                                                                           |        |
| chr16 | 33,100,001  | 33,200,000  | Deletion      | 0.1085 | 0.1085 | 0.4560 | 0.0002447  | 0.0100238   | 3  | exonic     | LOC85350,TP53TG3,TP53TG3B                                                                                                                          |        |
| chr16 | 87,000,001  | 87,100,000  | Amplification | 0.1347 | 0.0955 | 1.5644 | 1.67E-05   | 0.000607023 | 2  | exonic     | ZFPM1,ZNF469                                                                                                                                       |        |
| chr17 | 12,900,001  | 13,400,000  | Deletion      | 0.1424 | 0.0793 | 0.6356 | 2.04E-06   | 0.00144424  | 1  | exonic     | HS3ST3A1                                                                                                                                           |        |
| chr17 | 18,900,001  | 19,100,000  | Deletion      | 0.1866 | 0.0938 | 0.6206 | 0          | 0           | 1  | exonic     | GRAPL                                                                                                                                              |        |
| chr17 | 21,200,001  | 21,300,000  | Deletion      | 0.1154 | 0.0813 | 0.6217 | 9.54E-05   | 0.00546864  | 2  | exonic     | KCNJ12,KCNJ18                                                                                                                                      |        |
| chr17 | 22,200,001  | 22,300,000  | Deletion      | 0.1907 | 0.1907 | 0.4367 | 0          | 0           | 0  | intergenic | MTRNR2L1(dist=251883),MIR4522(dist=345063)                                                                                                         |        |

|       |             |             |               |        |        |        |            |             |    |            |                                                                                                                                                                                |       |
|-------|-------------|-------------|---------------|--------|--------|--------|------------|-------------|----|------------|--------------------------------------------------------------------------------------------------------------------------------------------------------------------------------|-------|
| chr17 | 22,200,001  | 22,300,000  | Amplification | 0.1858 | 0.1858 | 1.8317 | 2.00E-08   | 3.65E-06    | 0  | intergenic | MTRNR2L1(dst=251883),MIR4522(dst=345063)                                                                                                                                       |       |
| chr17 | 35,000,001  | 35,200,000  | Amplification | 0.1798 | 0.1538 | 2.1730 | 7.00E-08   | 5.84E-06    | 10 | exonic     | C17orf37,ERBB2,GRB7,JKZF3,NEUROD2,P<br>GAP3,PNMT,PPP1R1B,STARD3,TCAP                                                                                                           | ERBB2 |
| chr17 | 55,200,001  | 55,600,000  | Amplification | 0.1350 | 0.0867 | 1.8032 | 1.60E-05   | 0.00402003  | 6  | exonic     | CA4,HEATR6,RNFT1,RP56KB1,TUBD1,VM<br>P1                                                                                                                                        |       |
| chr17 | 56,600,001  | 57,100,000  | Amplification | 0.1630 | 0.0889 | 2.0052 | 4.80E-07   | 0.0001712   | 5  | exonic     | BCAS3,C17orf82,NACA2,TBX2,TBX4                                                                                                                                                 |       |
| chr17 | 71,000,001  | 71,100,000  | Amplification | 0.1228 | 0.0763 | 1.4252 | 6.70E-05   | 0.0160515   | 4  | exonic     | CASKIN2,KIAA0195,LLGL2,TSEN54                                                                                                                                                  |       |
| chr17 | 74,600,001  | 74,700,000  | Amplification | 0.1324 | 0.0766 | 1.4176 | 2.19E-05   | 0.00644872  | 1  | exonic     | RBFOX3                                                                                                                                                                         |       |
| chr17 | 77,000,001  | 77,100,000  | Amplification | 0.1715 | 0.0859 | 1.5020 | 1.20E-07   | 3.29E-05    | 2  | exonic     | ACTG1,BAHCC1                                                                                                                                                                   |       |
| chr17 | 78,600,001  | 78,774,742  | Amplification | 0.1398 | 0.0821 | 1.5355 | 9.23E-06   | 0.00238811  | 2  | exonic     | B3GNTL1,METRNL                                                                                                                                                                 |       |
| chr18 | 75,300,001  | 75,400,000  | Deletion      | 0.0943 | 0.0843 | 0.6157 | 0.00155909 | 0.0128852   | 1  | exonic     | NFATC1                                                                                                                                                                         |       |
| chr18 | 76,100,001  | 76,117,153  | Deletion      | 0.0891 | 0.0891 | 0.6958 | 0.00300632 | 0.0388875   | 1  | exonic     | PARD6G                                                                                                                                                                         |       |
| chr19 | 24,400,001  | 32,400,000  | Deletion      | 0.1013 | 0.1013 | 0.5769 | 0.00063097 | 0.00599025  | 0  | intergenic | LOC100102666(dst=261912),LOC148188(d<br>st=573241)                                                                                                                             |       |
| chr19 | 34,900,001  | 35,000,000  | Amplification | 0.0986 | 0.0986 | 1.7085 | 0.00093705 | 0.0323433   | 1  | exonic     | CCNE1                                                                                                                                                                          | CCNE1 |
| chr19 | 38,400,001  | 38,500,000  | Amplification | 0.0975 | 0.0975 | 1.5270 | 0.00106185 | 0.0446322   | 2  | exonic     | CEBP4,SLC7A10                                                                                                                                                                  | CEBP4 |
| chr19 | 40,900,001  | 41,000,000  | Amplification | 0.1025 | 0.0805 | 1.5079 | 0.00062472 | 0.0154512   | 9  | exonic     | ARHGAP33,C19orf55,HSPB6,IGFLR1,LIN37,<br>MLL4,PRODH2,PSENFEN,UZAF1L4                                                                                                           |       |
| chr19 | 43,200,001  | 43,700,000  | Amplification | 0.1339 | 0.0757 | 1.5491 | 1.85E-05   | 0.000583043 | 14 | exonic     | C19orf33,CATS,PERG,DPF1,FAM96C,GGN,<br>KCNK6,PPP1R14A,PSMD8,RASGRP4,RYR1,<br>SIPA1L3,SPINT2,SPRED3,YIF1B                                                                       |       |
| chr19 | 47,400,001  | 47,600,000  | Amplification | 0.1151 | 0.0814 | 1.4882 | 0.00015804 | 0.00343477  | 11 | exonic     | CIC,CNF1,DEDQ2,ERF1,GSK3A,LIP6,MEGF<br>6,PAPAH1B3,PRR19,TMEM145,ZNF526                                                                                                         | CIC   |
| chr20 | 29,300,001  | 30,300,000  | Amplification | 0.1416 | 0.0791 | 1.4307 | 7.40E-06   | 0.000592246 | 24 | exonic     | BCL2L1,C20orf160,COX4I2,DEFB115,DEFB<br>116,DEFB118,DEFB119,DEFB121,DEFB123,<br>DEFB124,DISP15,FOXO3,IKC1,NM13,D13M<br>YLK2,PDRG1,PLACL2,POFUT1,REM1,TM9<br>SF4,TPX2,TLL3,XKR7 |       |
| chr20 | 31,700,001  | 31,800,000  | Amplification | 0.1167 | 0.0763 | 1.3952 | 0.0001314  | 0.0135026   | 6  | exonic     | C20orf134,C20orf144,E2F1,NECAB3,PXMP4,<br>ZNF341                                                                                                                               |       |
| chr20 | 35,900,001  | 36,000,000  | Amplification | 0.1121 | 0.0756 | 1.4224 | 0.00022012 | 0.0220331   | 2  | exonic     | CTNBL1,VSTM2L                                                                                                                                                                  |       |
| chr20 | 42,200,001  | 42,900,000  | Amplification | 0.1549 | 0.0790 | 1.5951 | 1.43E-06   | 7.93E-05    | 13 | exonic     | ADA,C20orf111,FTM2,GDAP1L1,HNF4A,JP<br>H2,KCNK15,PKG3,R3HDM1,RMS4,SERINC<br>3,TPPAL,WSP2                                                                                       |       |
| chr20 | 48,200,001  | 48,500,000  | Amplification | 0.1211 | 0.0790 | 1.4593 | 8.13E-05   | 0.00815913  | 3  | exonic     | CEBPB,TMEM189,TMEM189-UBE2V1                                                                                                                                                   |       |
| chr20 | 55,400,001  | 55,500,000  | Amplification | 0.1280 | 0.0763 | 1.4531 | 3.70E-05   | 0.00337376  | 1  | exonic     | RBM38                                                                                                                                                                          |       |
| chr20 | 61,500,001  | 61,600,000  | Amplification | 0.1789 | 0.0914 | 1.5778 | 7.00E-08   | 4.88E-06    | 2  | exonic     | EEF1A2,KCNQ2                                                                                                                                                                   |       |
| chr21 | 10,300,001  | 13,300,000  | Deletion      | 0.1367 | 0.1367 | 0.6258 | 4.52E-06   | 0.000122702 | 0  | intergenic | BAGE(dst=179193),ANKRD30BP2(dst=323<br>58)                                                                                                                                     |       |
| chr21 | 10,300,001  | 13,300,000  | Amplification | 0.1305 | 0.0968 | 1.6485 | 2.70E-05   | 0.00075693  | 0  | intergenic | BAGE(dst=179193),ANKRD30BP2(dst=323<br>58)                                                                                                                                     |       |
| chr21 | 44,500,001  | 44,600,000  | Amplification | 0.1263 | 0.0821 | 1.5496 | 4.46E-05   | 0.00132236  | 5  | exonic     | AIRE,C21orf2,DNMT3L,PFKL,TRPM2                                                                                                                                                 |       |
| chr21 | 45,700,001  | 45,800,000  | Amplification | 0.1066 | 0.1066 | 1.5437 | 0.00040253 | 0.0109323   | 2  | exonic     | COL18A1,SLC19A1                                                                                                                                                                |       |
| chr22 | 17,000,001  | 17,100,000  | Amplification | 0.1173 | 0.1173 | 1.6643 | 0.00012391 | 0.0045712   | 1  | exonic     | USP18                                                                                                                                                                          |       |
| chr22 | 18,500,001  | 18,700,000  | Amplification | 0.1295 | 0.0752 | 1.5081 | 3.07E-05   | 0.000988382 | 3  | exonic     | DGCR8L,RTN4R,ZDHHC8                                                                                                                                                            |       |
| chr22 | 20,100,001  | 20,200,000  | Deletion      | 0.0972 | 0.0972 | 0.6363 | 0.00108273 | 0.025184    | 2  | exonic     | HIC2,TMEM191C                                                                                                                                                                  |       |
| chr22 | 20,100,001  | 20,200,000  | Amplification | 0.1043 | 0.0790 | 1.5075 | 0.00051629 | 0.0209543   | 2  | exonic     | HIC2,TMEM191C                                                                                                                                                                  |       |
| chr22 | 41,000,001  | 41,100,000  | Deletion      | 0.0964 | 0.0964 | 0.6384 | 0.00118751 | 0.0337941   | 1  | ncRNA      | LOC388906                                                                                                                                                                      |       |
| chr22 | 44,700,001  | 44,800,000  | Deletion      | 0.1212 | 0.1212 | 0.6104 | 4.28E-05   | 0.0016838   | 1  | exonic     | WNT7B                                                                                                                                                                          |       |
| chr22 | 49,000,001  | 49,100,000  | Amplification | 0.1338 | 0.0784 | 1.5297 | 1.87E-05   | 0.000586747 | 6  | exonic     | FAM116B,HDAC10,MAPK11,MAPK12,PLXN<br>B2,TUBGCP9                                                                                                                                |       |
| chr22 | 49,000,001  | 49,100,000  | Deletion      | 0.1326 | 0.0864 | 0.6250 | 8.32E-06   | 0.000202871 | 6  | exonic     | FAM116B,HDAC10,MAPK11,MAPK12,PLXN<br>B2,TUBGCP9                                                                                                                                |       |
| chrX  | 58,600,001  | 61,600,000  | Deletion      | 0.1275 | 0.1275 | 0.5279 | 1.80E-05   | 0.000372289 | 0  | intergenic | ZXD(dst=946209),SPIN4(dst=883832)                                                                                                                                              |       |
| chrX  | 152,400,001 | 152,700,000 | Amplification | 0.1598 | 0.0821 | 1.5616 | 7.60E-07   | 4.09E-05    | 10 | exonic     | ABCD1,ATP2B3,BCAP31,BGN,DUSP9,FAM<br>58A,PLXNB3,PNCK,SLC6A8,SRPK3                                                                                                              |       |

**Supplementary Table 10. Gene fusion candidates predicted by RNA-Seq in the 42 TCCs.**

| Case/Tumor ID  | Upstream gene | Chromosome of upstream gene | Strand of upstream gene | Genomic breakpoint of upstream gene | Downstream gene | Chromosome of downstream gene | Strand of downstream gene | Genomic breakpoint of downstream gene | Number of paired end reads spanning the breakpoint (Tumor/Normal) | Number of reads split by the breakpoint (Tumor/Normal) |
|----------------|---------------|-----------------------------|-------------------------|-------------------------------------|-----------------|-------------------------------|---------------------------|---------------------------------------|-------------------------------------------------------------------|--------------------------------------------------------|
| B56            | ACTR6         | chr12                       | +                       | 99,122,966                          | MYL6            | chr12                         | +                         | 54,841,438                            | 216/5                                                             | 180/6                                                  |
| B77            | ASXL1         | chr20                       | +                       | 30,420,587                          | DUSP8           | chr11                         | -                         | 1,543,740                             | 9/0                                                               | 9/0                                                    |
| B89-4-CA       | BPIFB1        | chr20                       | +                       | 31,325,121                          | IDO2            | chr8                          | +                         | 39,963,711                            | 6/NA                                                              | 6/NA                                                   |
| B23            | C6orf106      | chr6                        | -                       | 34,772,201                          | RNF144B         | chr6                          | +                         | 18,507,709                            | 7/0                                                               | 5/0                                                    |
| B105-1-CA      | CDKAL1        | chr6                        | +                       | 21,309,484                          | MBOAT1          | chr6                          | -                         | 20,260,979                            | 11/NA                                                             | 12/NA                                                  |
| B65-CA         | CPSF6         | chr12                       | +                       | 67,942,609                          | FUS             | chr16                         | +                         | 31,107,147                            | 9/NA                                                              | 8/NA                                                   |
| <b>B100-CA</b> | FGFR3         | chr4                        | +                       | 1,778,504                           | TACC3           | chr4                          | +                         | 1,700,278                             | 112/NA                                                            | 118/NA                                                 |
| <b>B59</b>     | FGFR3         | chr4                        | +                       | 1,778,459                           | TACC3           | chr4                          | +                         | 1,711,227                             | 446/0                                                             | 411/0                                                  |
| B15-CA         | GPR21         | chr9                        | +                       | 124,837,783                         | ARMC10          | chr7                          | +                         | 102,527,273                           | 7/NA                                                              | 7/NA                                                   |
| B105-0-CA      | LRFN3         | chr19                       | +                       | 41,119,938                          | APIM2           | chr19                         | -                         | 10,548,976                            | 7/NA                                                              | 8/NA                                                   |
| B9-CA          | LSM14A        | chr19                       | +                       | 39,377,386                          | PDCD2L          | chr19                         | +                         | 39,604,264                            | 37/NA                                                             | 71/NA                                                  |
| B65-CA         | MDM1          | chr12                       | -                       | 67,011,154                          | FCF1            | chr14                         | +                         | 74,272,380                            | 65/NA                                                             | 54/NA                                                  |
| B101-CA        | NAPA          | chr19                       | -                       | 52,709,912                          | KCNIP3          | chr2                          | +                         | 95,403,771                            | 13/NA                                                             | 12/NA                                                  |
| B89-4-CA       | NEAT1         | chr11                       | +                       | 64,968,369                          | ARMC10          | chr7                          | +                         | 102,527,277                           | 7/NA                                                              | 6/NA                                                   |
| B65-CA         | NUP107        | chr12                       | +                       | 67,415,391                          | MDM1            | chr12                         | -                         | 67,011,268                            | 164/NA                                                            | 80/NA                                                  |
| B9-CA          | PLEKHA7       | chr11                       | -                       | 16,992,112                          | RPS13           | chr11                         | -                         | 17,055,600                            | 15/NA                                                             | 17/NA                                                  |
| B15-CA         | PTBP1         | chr19                       | +                       | 755,438                             | PALM            | chr19                         | +                         | 677,138                               | 11/NA                                                             | 13/NA                                                  |
| B89-4-CA       | PTGES         | chr9                        | -                       | 131,540,511                         | ARMC10          | chr7                          | +                         | 102,527,271                           | 28/NA                                                             | 8/NA                                                   |
| B9-CA          | RAB2A         | chr8                        | +                       | 61,592,366                          | CLVS1           | chr8                          | +                         | 62,451,718                            | 7/NA                                                              | 8/NA                                                   |
| B56            | RBM19         | chr12                       | -                       | 112,837,158                         | TMPRSS12        | chr12                         | +                         | 49,538,834                            | 5/0                                                               | 5/0                                                    |
| B59            | RBM47         | chr4                        | -                       | 40,241,196                          | C6orf145        | chr6                          | -                         | 3,672,895                             | 10/0                                                              | 12/0                                                   |
| B89-12-CA      | RPL31         | chr2                        | +                       | 100,988,965                         | AFF3            | chr2                          | -                         | 99,710,022                            | 29/NA                                                             | 20/NA                                                  |
| B89-12-CA      | RPSAP58       | chr19                       | +                       | 23,737,776                          | NCALD           | chr8                          | -                         | 102,997,262                           | 8/NA                                                              | 7/NA                                                   |
| B80-8-CA       | SARS          | chr1                        | +                       | 109,568,193                         | GPSM2           | chr1                          | +                         | 109,262,758                           | 8/NA                                                              | 15/NA                                                  |
| B9-CA          | SEC24B        | chr4                        | +                       | 110,574,607                         | CCDC109B        | chr4                          | +                         | 110,823,187                           | 17/NA                                                             | 21/NA                                                  |
| B89-5-CA       | SEMA5A        | chr5                        | -                       | 9,598,696                           | NDUFS6          | chr5                          | +                         | 1,855,435                             | 13/NA                                                             | 18/NA                                                  |
| B9-CA          | STARD3        | chr17                       | +                       | 35,047,010                          | SCFD2           | chr4                          | -                         | 53,481,794                            | 7/NA                                                              | 12/NA                                                  |
| B66-CA         | SUV420H1      | chr11                       | -                       | 67,703,513                          | DPP3            | chr11                         | +                         | 66,019,253                            | 18/NA                                                             | 6/NA                                                   |
| B65-CA         | TRAK1         | chr3                        | +                       | 42,176,969                          | ZNF692          | chr1                          | -                         | 247,119,143                           | 6/NA                                                              | 5/NA                                                   |
| B71            | UCK2          | chr1                        | +                       | 164,063,793                         | DNM3-AS1        | chr1                          | -                         | 170,380,200                           | 246/3                                                             | 352/5                                                  |
| B105-1-CA      | USP12         | chr13                       | -                       | 26,643,729                          | ELF1            | chr13                         | -                         | 40,454,418                            | 13/NA                                                             | 19/NA                                                  |
| B57            | ZNF320        | chr19                       | -                       | 58,073,310                          | APOL1           | chr22                         | +                         | 34,992,919                            | 7/0                                                               | 6/0                                                    |

NA indicates the morphologically normal bladder tissues were not available

**Supplementary Table 11. Pathways that are significantly enriched with genetic alterations in TCC.**

| Pathway name                            | The number of reference genes in the category | Number of genes in the gene set and also in the category | Expected number in the category | Ratio of enrichment | P value from hypergeometric test | FDR      |
|-----------------------------------------|-----------------------------------------------|----------------------------------------------------------|---------------------------------|---------------------|----------------------------------|----------|
| MAPK signaling pathway                  | 269                                           | 31                                                       | 6.05                            | 5.12                | 1.38E-13                         | 1.92E-12 |
| Cell cycle                              | 128                                           | 21                                                       | 2.88                            | 7.29                | 1.29E-12                         | 1.63E-11 |
| ErbB signaling pathway                  | 87                                            | 17                                                       | 1.96                            | 8.69                | 9.61E-12                         | 1.11E-10 |
| ECM-receptor interaction                | 84                                            | 16                                                       | 1.89                            | 8.47                | 5.86E-11                         | 6.01E-10 |
| Calcium signaling pathway               | 178                                           | 21                                                       | 4                               | 5.24                | 7.53E-10                         | 6.16E-09 |
| Regulation of actin cytoskeleton        | 216                                           | 23                                                       | 4.86                            | 4.73                | 9.18E-10                         | 7.09E-09 |
| Insulin signaling pathway               | 137                                           | 18                                                       | 3.08                            | 5.84                | 2.14E-09                         | 1.49E-08 |
| Neurotrophin signaling pathway          | 126                                           | 17                                                       | 2.83                            | 6                   | 3.95E-09                         | 2.61E-08 |
| Long-term potentiation                  | 70                                            | 13                                                       | 1.57                            | 8.26                | 5.09E-09                         | 3.22E-08 |
| Axon guidance                           | 129                                           | 17                                                       | 2.9                             | 5.86                | 5.69E-09                         | 3.41E-08 |
| Notch signaling pathway                 | 47                                            | 11                                                       | 1.06                            | 10.4                | 5.89E-09                         | 3.41E-08 |
| GnRH signaling pathway                  | 101                                           | 15                                                       | 2.27                            | 6.6                 | 8.50E-09                         | 4.73E-08 |
| TGF-beta signaling pathway              | 87                                            | 14                                                       | 1.96                            | 7.15                | 9.19E-09                         | 4.91E-08 |
| Endocytosis                             | 187                                           | 20                                                       | 4.21                            | 4.75                | 1.05E-08                         | 5.41E-08 |
| Purine metabolism                       | 151                                           | 16                                                       | 3.4                             | 4.71                | 3.46E-07                         | 1.50E-06 |
| p53 signaling pathway                   | 69                                            | 11                                                       | 1.55                            | 7.09                | 3.93E-07                         | 1.66E-06 |
| Adherens junction                       | 77                                            | 11                                                       | 1.73                            | 6.35                | 1.22E-06                         | 4.99E-06 |
| Vascular smooth muscle contraction      | 115                                           | 13                                                       | 2.59                            | 5.02                | 2.07E-06                         | 7.99E-06 |
| RNA polymerase                          | 29                                            | 7                                                        | 0.65                            | 10.73               | 2.89E-06                         | 1.08E-05 |
| Ubiquitin mediated proteolysis          | 138                                           | 14                                                       | 3.1                             | 4.51                | 3.10E-06                         | 1.10E-05 |
| Long-term depression                    | 70                                            | 10                                                       | 1.57                            | 6.35                | 3.72E-06                         | 1.29E-05 |
| Phosphatidylinositol signaling system   | 76                                            | 10                                                       | 1.71                            | 5.85                | 7.92E-06                         | 2.62E-05 |
| Wnt signaling pathway                   | 151                                           | 14                                                       | 3.4                             | 4.12                | 8.89E-06                         | 2.87E-05 |
| Oocyte meiosis                          | 114                                           | 12                                                       | 2.56                            | 4.68                | 1.06E-05                         | 3.35E-05 |
| Pyrimidine metabolism                   | 98                                            | 11                                                       | 2.2                             | 4.99                | 1.34E-05                         | 4.14E-05 |
| mTOR signaling pathway                  | 52                                            | 8                                                        | 1.17                            | 6.84                | 2.00E-05                         | 5.91E-05 |
| Chemokine signaling pathway             | 190                                           | 15                                                       | 4.27                            | 3.51                | 2.95E-05                         | 8.20E-05 |
| Gap junction                            | 90                                            | 10                                                       | 2.02                            | 4.94                | 3.58E-05                         | 9.76E-05 |
| VEGF signaling pathway                  | 76                                            | 9                                                        | 1.71                            | 5.26                | 5.27E-05                         | 0.0001   |
| Glycosaminoglycan degradation           | 21                                            | 5                                                        | 0.47                            | 10.58               | 8.60E-05                         | 0.0002   |
| Progesterone-mediated oocyte maturation | 86                                            | 9                                                        | 1.93                            | 4.65                | 0.0001                           | 0.0002   |
| Tight junction                          | 134                                           | 11                                                       | 3.01                            | 3.65                | 0.0002                           | 0.0005   |
| Leukocyte transendothelial migration    | 118                                           | 10                                                       | 2.65                            | 3.77                | 0.0003                           | 0.0007   |
| B cell receptor signaling pathway       | 75                                            | 8                                                        | 1.69                            | 4.74                | 0.0003                           | 0.0007   |
| Lysine degradation                      | 44                                            | 6                                                        | 0.99                            | 6.06                | 0.0004                           | 0.0009   |
| NOD-like receptor signaling pathway     | 62                                            | 7                                                        | 1.39                            | 5.02                | 0.0005                           | 0.0011   |
| PPAR signaling pathway                  | 69                                            | 7                                                        | 1.55                            | 4.51                | 0.0009                           | 0.002    |
| RIG-I-like receptor signaling pathway   | 71                                            | 7                                                        | 1.6                             | 4.38                | 0.0011                           | 0.0024   |
| Basal transcription factors             | 36                                            | 5                                                        | 0.81                            | 6.17                | 0.0012                           | 0.0026   |
| Lysosome                                | 117                                           | 9                                                        | 2.63                            | 3.42                | 0.0014                           | 0.0029   |
| Jak-STAT signaling pathway              | 155                                           | 10                                                       | 3.49                            | 2.87                | 0.0028                           | 0.0056   |

|                                           |     |   |      |      |        |        |
|-------------------------------------------|-----|---|------|------|--------|--------|
| Nucleotide excision repair                | 44  | 5 | 0.99 | 5.05 | 0.003  | 0.0059 |
| T cell receptor signaling pathway         | 108 | 8 | 2.43 | 3.29 | 0.0031 | 0.006  |
| Tyrosine metabolism                       | 46  | 5 | 1.03 | 4.83 | 0.0036 | 0.0069 |
| Apoptosis                                 | 88  | 7 | 1.98 | 3.54 | 0.0037 | 0.007  |
| Natural killer cell mediated cytotoxicity | 137 | 9 | 3.08 | 2.92 | 0.004  | 0.0074 |

---

**Supplementary Table 12A. *STAG2* exons primers for screening of *STAG2* in additional 50 TCCs.**

| <b>STAG2 EXON PRIMER</b> |                                  |
|--------------------------|----------------------------------|
| <b>STAG2-3F</b>          | 5'GCACTGGGGAATTTAACTTTTG3'       |
| <b>STAG2-3R</b>          | 5'CAGAGCCTTGATGAGTGCTG3'         |
| <b>STAG2-4F</b>          | 5'TCTTGTGTGTTTGGTAACGTGC3'       |
| <b>STAG2-4R</b>          | 5'GCTTACCATAACCAATCAGCTCC3'      |
| <b>STAG2-5F</b>          | 5'GGACACCACAAAGAGGCTGT3'         |
| <b>STAG2-5R</b>          | 5'TGCAATTAGAAAAATCAGAGCTACA3'    |
| <b>STAG2-6F</b>          | 5'TTGACTTCCATAGTTTCCACATTC3'     |
| <b>STAG2-6R</b>          | 5'AAAGTGCTAACAAACATCTCTTTAGGTG3' |
| <b>STAG2-7F</b>          | 5'AGTAAAGTGAGTCAGGTAGAAATGGC3'   |
| <b>STAG2-7R</b>          | 5'CATGCCCAGCCTAATGCTTAC3'        |
| <b>STAG2-8F</b>          | 5'GGATTTATTGGAGAAGAAAGGTGAG3'    |
| <b>STAG2-8R</b>          | 5'AATTCGCAGGAGGGATGG3'           |
| <b>STAG2-9F</b>          | 5'CATTGTAGCAGCTGCATCTTTC3'       |
| <b>STAG2-9R</b>          | 5'TGTTGGGCAAATAGTTTCAAATG3'      |
| <b>STAG2-10F</b>         | 5'CCAATCAAATATTTTCAGGTATTAAGGG3' |
| <b>STAG2-10R</b>         | 5'TGACTCAGTGGCACTAATGGAG3'       |
| <b>STAG2-11F</b>         | 5'GTGAGCAAAGGCTGGGATATG3'        |
| <b>STAG2-11R</b>         | 5'GGAGGCTTCCAGAAATGTGTC3'        |
| <b>STAG2-12F</b>         | 5'TCTGAAGGAATGCTATGGTATGAAA3'    |
| <b>STAG2-12R</b>         | 5'TGTCAAGGGTCATAGACACAATTC3'     |
| <b>STAG2-13F</b>         | 5'TTTACCAGTCGGTTCAAGGTTAG3'      |
| <b>STAG2-13R</b>         | 5'TTCTATGGTTCCTTCTTCCTGTG3'      |
| <b>STAG2-14F</b>         | 5'GGACGTTACTAAAAGCACCTGTT3'      |
| <b>STAG2-14R</b>         | 5'CCCAGCCTACATTTCCCTTT3'         |
| <b>STAG2-15F</b>         | 5'TGTGCCATGTTGGATGATATTG3'       |
| <b>STAG2-15R</b>         | 5'GGGTGGCTCTCCATTCTATTC3'        |
| <b>STAG2-16F</b>         | 5'GCAAGCAAATAAGGCAGTTTC3'        |
| <b>STAG2-16R</b>         | 5'ATAAAGAATGTTGACAGCAATTACATC3'  |
| <b>STAG2-17F</b>         | 5'GGCAGATTCTGTTTACAGGCAG3'       |
| <b>STAG2-17R</b>         | 5'TCAAATTTCTCAAATTGCTAATGC3'     |
| <b>STAG2-18F</b>         | 5'ACCATCTGAAGGTAGAGTTGGTTAG3'    |
| <b>STAG2-18R</b>         | 5'AAAGCATTATAATATTCTGTGAGGCA3'   |
| <b>STAG2-19F</b>         | 5'TGGCCCTTCCTCAGTTATTAGC3'       |
| <b>STAG2-19R</b>         | 5'CAAAGGAAGCATCATTACCG3'         |
| <b>STAG2-20F</b>         | 5'CCATGGTGGTATGGTCATGTAG3'       |
| <b>STAG2-20R</b>         | 5'CTGCTAGGGACTATCACCAAGAC3'      |
| <b>STAG2-21F</b>         | 5'CCCAGCCATATTGCCTTAAAT3'        |
| <b>STAG2-21R</b>         | 5'CCCACAACGACAACAACAAT3'         |
| <b>STAG2-22F</b>         | 5'CGTTGTGGGGGCATTTTA3'           |
| <b>STAG2-22R</b>         | 5'GCAAGTTGCCAAAGGATTACA3'        |

|                  |                                  |
|------------------|----------------------------------|
| <b>STAG2-23F</b> | 5'AAATGGAGACATGCCTGAGC3'         |
| <b>STAG2-23R</b> | 5'AACCACAGATTATGCCACCTTC3'       |
| <b>STAG2-24F</b> | 5'TTAAGGCTGCAATTTGGTGAG3'        |
| <b>STAG2-24R</b> | 5'CAAGATATTTCTGCTTTGCTCAAT3'     |
| <b>STAG2-25F</b> | 5'GCCTTATACAAATATAAGCATTTCGTTG3' |
| <b>STAG2-25R</b> | 5'GCTGGAATATATACCTGTGTTTCACG3'   |
| <b>STAG2-26F</b> | 5'TGGAGTGATTCAGTTCCATTTG3'       |
| <b>STAG2-26R</b> | 5'CCTTAAAGAATTCAATGGCAGC3'       |
| <b>STAG2-27F</b> | 5'GGTTTCAGTAACATTCTTTCTGC3'      |
| <b>STAG2-27R</b> | 5'ACTTTGCCCAATTTCAACTGC3'        |
| <b>STAG2-28F</b> | 5'CAGTGCCTCATTTATTGAACACC3'      |
| <b>STAG2-28R</b> | 5'AATTGAGATAGCACTGTAAGTGGTTC3'   |
| <b>STAG2-29F</b> | 5'GCTTGGCAAAGGAAGTAGTGAG3'       |
| <b>STAG2-29R</b> | 5'AATGCAATCCTACAATTCTGTGTG3'     |
| <b>STAG2-30F</b> | 5'ATGCCTATGCTCGCACAATA3'         |
| <b>STAG2-30R</b> | 5'TTTGTAAGCTATTATTGAACACATCTCA3' |
| <b>STAG2-31F</b> | 5'CAGGGACTGCCCCTTACATA3'         |
| <b>STAG2-31R</b> | 5'TTGCCTTGCTTCCTCTTGTT3'         |
| <b>STAG2-32F</b> | 5'TCCAATGCAGACTGAACATCA3'        |
| <b>STAG2-32R</b> | 5'TGCTTTTCTGTTGGAAAGACC3'        |
| <b>STAG2-33F</b> | 5'AGAGAGCCACATACTGCTGCC3'        |
| <b>STAG2-33R</b> | 5'GGATCTACCACCTTCACCAACC3'       |
| <b>STAG2-34F</b> | 5'TGTGTCAGGTACACTTGGAATCAC 3'    |
| <b>STAG2-34R</b> | 5'CCTCCCACTGAAATCCTGC3'          |
| <b>STAG2-35F</b> | 5'TGAGGTAAGTAGCATCTTGATTAGTCC3'  |
| <b>STAG2-35R</b> | 5'CCTCAATGCACTTGATCTTGG3'        |

**Supplementary Table 12B. Bisulfite PCR primers used in STAG2 promoter methylation analysis.**

| <b>Bisulfite PCR primers</b> |                                           |
|------------------------------|-------------------------------------------|
| <i>STAG2</i> F               | 5'-GGGAATTAGGGTTATAGGTTTTTTATAGGGGTGTG-3' |
| <i>STAG2</i> R               | 5'-CTAACTCCAACCCTCCACCCAAC-3'             |

**Supplementary Table 13. Real time quantitative PCR primers for validation of amplifications of *CCND1*, *ERBB2* and *DHFR*, and deletions of *CDKN2A/B*.**

| <b>Real Time PCR Primers</b> |                                   |
|------------------------------|-----------------------------------|
| <i>CCND1</i> F               | 5' CTGCGAGGAACAGAAGTGCG 3'        |
| <i>CCND1</i> R               | 5' GGATGGAGTTGTTCGGTGTAGATG<br>3' |
| <i>CDKN2A/2B</i> F           | 5' GAAGTCTTGGTCCTGATGTCCCC<br>3'  |
| <i>CDKN2A/2B</i> R           | 5' CGGCTCTTCTGCACAACTCAACT<br>3'  |
| <i>DHFR</i> F                | 5' AGGGACCAGGTTGGATTAGGC 3'       |
| <i>DHFR</i> R                | 5' AGGGCAAGGAAGTCTTCACAGC<br>3'   |
| <i>ERBB2</i> F               | 5' CTGCTGGACATTGACGAGACA 3'       |
| <i>ERBB2</i> R               | 5' TTGATGGGCACCTGGGAG 3'          |

**Supplementary Table 14. The detailed information on positions and sequences of RT-PCR and PCR primers in experiment of *FGFR3-TACC3* confirmation in B59**

| <b>Primer</b> | <b>Sequence</b>            | <b>Position (hg18)</b> |
|---------------|----------------------------|------------------------|
| P1 F          | 5' AGAGGCCACCTTCAAGCA 3'   | 1,778,395-1,778,413    |
| P1 R          | 5' TCCTCAGCTCCCGTTCTC 3'   | 1,711,245-1,711,263    |
| P3 F          | 5' GGCTGTTCCCGAATAAGGC 3'  | 1,778,295-1,778,313    |
| P3 R          | 5' CAAGTCAGCAGGCAGGCG 3'   | 1,711,193-1,711,210    |
| P4 F          | 5' CCGCCAACCTGCACACACG 3'  | 1,778,187-1,778,204    |
| P4 R          | 5' AGGAAGTTCAGAAGCAGAAG 3' | 1,712,351-1,712,370    |
